# Supplementary material
Source: bioRxiv or medRxiv preprint supplement (https://medrxiv.org/highwire/filestream/87177/field_highwire_adjunct_files/0/2020.06.23.20138271-1.pdf)

**The overlap of genetic susceptibility to schizophrenia and cardiometabolic disease can be used to identify metabolically different groups of individuals**

#### **Supplemental data**

- Supplemental members of the IMPROVE study group
- Supplemental Tables
- Supplemental Figures

### **Supplemental members of the IMPROVE study group**

- Centro Cardiologico Monzino, IRCCS, Milan Italy: E. Tremoli, D. Baldassarre, M. Amato, B. Frigerio, A. Ravani, D. Sansaro, D. Coggi, F. Veglia, C. Tedesco, N. Capra, A. Bonomi.
- Department of Medical Biotechnology and Translational Medicine, Università di Milano, Milan, Italy: D. Baldassarre.
- Dipartimento di Scienze Farmacologiche e Biomolecolari, Università di Milano, Milan, Italy: Laura Calabresi, C.R. Sirtori.
- Cardiovascular Medicine Unit, Department of Medicine Solna, Karolinska Institutet. Per Eriksson, Angela Silveira, Bruna Gigante.
- Division of Cardiovascular and Nutritional Epidemiology, Institute of Environmental Medicine, Karolinska Institutet. Karin Leander, Federica Laguzzi.
- Cardiovascular Medicine Unit, Department of Medicine Solna, Karolinska Institutet. Anders Hamsten.
- Division of Cardiovascular and Nutritional Epidemiology, Institute of Environmental Medicine, Karolinska Institutet. Ulf de Faire.
- Cardiovascular Genetics, Institute Cardiovascular Science, University College of London, Rayne Building, University Street, London, United Kingdom. Steve E. Humphries, J. Cooper, J. Acharya.
- Foundation for Research in Health Exercise and Nutrition, Kuopio Research Institute of Exercise Medicine, Kuopio, Finland: K. Savonen, K. Huttunen, E. Rauramaa, I.M. Penttila, J. Törrönen.
- Department of Medicine, University Medical Center Groningen, Groningen & Isala Clinics Zwolle, Department of Medicine; the Netherlands: Andries J. Smit, A.I. van Gessel, A.M van Roon, A. Nicolai, D.J. Mulder, G.H. Smeets.
- Sorbonne Université, INSERM UMR1166, cardiovascular prevention unit, AP-HP, Groupe Hôpitalier Pitié-Salpêtrière, Paris, France: Philippe Giral, Anatole Kontush, Alain Carrié, Antonio Gallo.
- Institute of Public Health and Clinical Nutrition, University of Eastern Finland, Kuopio Campus: Sudhir Kurl, J. Karppi, T. Nurmi, K. Nyyssönen, T.P. Tuomainen, J. Tuomainen, J. Kauhanen.
- Internal Medicine, Angiology and Arteriosclerosis Diseases, Department of Medicine, University of Perugia, Perugia, Italy: M. Pirro, M.R. Mannarino, G. Vaudo, V. Bianconi, D. Siepi, G. Lupattelli.

## **Supplemental Tables**

- Supplementary Table 1: IMPROVE clusters based on different MAF filters
- Supplementary Table 2: Demographic characteristics of the UKB2 MH and no MH participants, by cluster
- Supplementary Table 3: Genetic loci associated with SCZ, MDD, BD and present on the illumine CardioMetabo and Immuno chips.

## Supplemental Figures

- Supplemental Figure 1: Results of MDS analysis in IMPROVE, using the loci in common between CMD and SCZ with MAF >1%, where latitude is a) 43 °N, b) 45 °N, c) 48 °N, d) 53 °N, e) 59 °N, f) 62 °N.
- Supplementary Figure 2: Results of MDS analysis in UKB2 using all SCZ-associated loci.

STable1: IMPROVE clusters based on different MAF filters

|         |   | MAF >10% |      |     |
|---------|---|----------|------|-----|
|         |   | 1        | 2    | 3   |
| MAF >1% | 1 | 1160     | 0    | 0   |
|         | 2 | 0        | 1375 | 1   |
|         | 3 | 0        | 0    | 519 |

Supplemental Table 3: SNPs in loci associated with SCZ, MDD or BD available on the CardioMetabo and Immuno chips

| SCZ |            |          | MDD |             |          | BD  |             |           |
|-----|------------|----------|-----|-------------|----------|-----|-------------|-----------|
| Chr | SNP        | BP       | Chr | SNP         | BP       | Chr | SNP         | BP        |
| 1   | rs10910077 | 2390331  | 1   | rs11587140  | 8260834  | 1   | rs11205277  | 149892872 |
| 1   | rs2252865  | 8422676  | 1   | rs11121129  | 8268095  | 1   | rs11205303  | 149906413 |
| 1   | rs10779702 | 8423510  | 1   | rs17032305  | 8270490  | 1   | rs113759410 | 149907259 |
| 1   | rs894875   | 8432136  | 1   | rs11589993  | 8284497  | 1   | rs4926400   | 149931541 |
| 1   | rs6678140  | 8436802  | 1   | rs423909    | 8285186  | 1   | rs10888575  | 150169211 |
| 1   | rs2708633  | 8439625  | 1   | rs11121152  | 8357221  | 1   | rs12086155  | 150189738 |
| 1   | rs3765971  | 8445360  | 1   | rs12711517  | 8394236  | 1   | rs6679147   | 150192450 |
| 1   | rs2784736  | 8460284  | 1   | rs10399665  | 8407287  | 1   | rs6655935   | 150210538 |
| 1   | rs301795   | 8467353  | 1   | rs2252865   | 8422676  | 1   | rs12139286  | 150262455 |
| 1   | rs301789   | 8469337  | 1   | rs10779702  | 8423510  | 1   | rs17648797  | 150338002 |
| 1   | rs1763839  | 8473336  | 1   | rs894875    | 8432136  | 2   | rs4907237   | 97190497  |
| 1   | rs301798   | 8488565  | 1   | rs6678140   | 8436802  | 2   | rs6576973   | 97218367  |
| 1   | rs172531   | 8495590  | 1   | rs2708633   | 8439625  | 2   | rs7599598   | 97351840  |
| 1   | rs301801   | 8495945  | 1   | rs3765971   | 8445360  | 2   | rs12466906  | 97359442  |
| 1   | rs17385721 | 8543081  | 1   | rs2784736   | 8460284  | 2   | rs2872633   | 97366599  |
| 1   | rs10798927 | 30413903 | 1   | rs301795    | 8467353  | 2   | rs3731940   | 97377883  |
| 1   | rs1498243  | 30415026 | 1   | rs301789    | 8469337  | 2   | rs6758151   | 97388884  |
| 1   | rs11583665 | 30419456 | 1   | rs1763839   | 8473336  | 2   | rs6727384   | 97400324  |
| 1   | rs267700   | 30430366 | 1   | rs301798    | 8488565  | 2   | rs2271893   | 97405440  |
| 1   | rs1009080  | 30431560 | 1   | rs172531    | 8495590  | 2   | rs6746896   | 97410949  |
| 1   | rs4949526  | 30432219 | 1   | rs301801    | 8495945  | 2   | rs2314398   | 97413488  |
| 1   | rs6694545  | 30437268 | 1   | rs17385721  | 8543081  | 2   | rs968470    | 97423626  |
| 1   | rs3001723  | 44037685 | 1   | rs10864360  | 8724522  | 2   | rs7586317   | 97447831  |
| 1   | rs11210892 | 44100084 | 1   | rs10864361  | 8726721  | 2   | rs6576984   | 97454705  |
| 1   | rs660899   | 44117006 | 1   | rs2630391   | 72564879 | 2   | rs7608661   | 97459920  |
| 1   | rs6424546  | 73776673 | 1   | rs11209910  | 72565630 | 2   | rs1318597   | 97463095  |
| 1   | rs17568889 | 73847888 | 1   | rs1905978   | 72565800 | 2   | rs7582249   | 97463529  |
| 1   | rs12120482 | 73849893 | 1   | rs17588241  | 72567009 | 2   | rs4907251   | 97484814  |
| 1   | rs10875071 | 97814678 | 1   | rs17588282  | 72567065 | 2   | rs10182965  | 97562551  |
| 1   | rs4950028  | 97821081 | 1   | rs10493493  | 72569309 | 2   | rs7589232   | 97566148  |
| 1   | rs12563828 | 97830721 | 1   | rs2630392   | 72569613 | 2   | rs7592101   | 97579507  |
| 1   | rs4378243  | 98395881 | 1   | rs2821251   | 72569980 | 2   | rs17829596  | 165985503 |
| 1   | rs10875121 | 98417446 | 1   | rs11589787  | 72570425 | 2   | rs10930152  | 166001183 |
| 1   | rs11165934 | 98417967 | 1   | rs1486091   | 72571364 | 2   | rs7586796   | 166014227 |
| 1   | rs9887831  | 98431639 | 1   | rs1352082   | 72571656 | 2   | rs10803795  | 166109764 |
| 1   | rs12067700 | 98436232 | 1   | rs2821249   | 72571841 | 2   | rs7600082   | 166117860 |
| 1   | rs12067567 | 98441888 | 1   | rs78851102  | 72572054 | 2   | rs353112    | 166137083 |
| 1   | rs11165939 | 98443509 | 1   | rs2630393   | 72572724 | 2   | rs1849811   | 166278012 |
| 1   | rs4573558  | 98456907 | 1   | rs113385727 | 72572991 | 2   | rs17249048  | 166368762 |
| 1   | rs1938570  | 98461954 | 1   | rs1486093   | 72573363 | 2   | rs2221999   | 166383350 |
| 1   | rs10747495 | 98470605 | 1   | rs1564970   | 72573798 | 2   | rs10427253  | 166399158 |
| 1   | rs9324387  | 98488030 | 1   | rs56062633  | 72574617 | 2   | rs2581102   | 194399232 |
| 1   | rs2391905  | 98489735 | 1   | rs2821248   | 72575560 | 2   | rs2581113   | 194446558 |
| 1   | rs1938568  | 98491732 | 1   | rs10789333  | 72577056 | 2   | rs1585653   | 194458310 |
| 1   | rs1625579  | 98502934 | 1   | rs2630395   | 72577177 | 2   | rs16835263  | 194479605 |

|   |             |           |   |             |          |   |            |           |
|---|-------------|-----------|---|-------------|----------|---|------------|-----------|
| 1 | rs2660304   | 98512127  | 1 | rs142453386 | 72577736 | 2 | rs4531946  | 194664395 |
| 1 | rs1702292   | 98524960  | 1 | rs34709497  | 72577950 | 2 | rs13418354 | 194675382 |
| 1 | rs1702291   | 98526167  | 1 | rs2821245   | 72578695 | 2 | rs7606858  | 194681933 |
| 1 | rs2660300   | 98528211  | 1 | rs12402629  | 72578709 | 3 | rs7616895  | 36643821  |
| 1 | rs2660299   | 98528452  | 1 | rs2821244   | 72579146 | 3 | rs17035408 | 36687900  |
| 1 | rs1782812   | 98547502  | 1 | rs12124902  | 72579373 | 3 | rs12107591 | 36751198  |
| 1 | rs1198588   | 98552832  | 1 | rs12026323  | 72579734 | 3 | rs9820240  | 36796647  |
| 1 | rs10888575  | 150169211 | 1 | rs1486095   | 72580511 | 3 | rs7620657  | 36800257  |
| 1 | rs12086155  | 150189738 | 1 | rs2630396   | 72580670 | 3 | rs4678902  | 36802741  |
| 1 | rs6679147   | 150192450 | 1 | rs188374711 | 72580896 | 3 | rs17035576 | 36817025  |
| 1 | rs6655935   | 150210538 | 1 | rs76828664  | 72581409 | 3 | rs1876471  | 36819260  |
| 1 | rs6670165   | 177280121 | 1 | rs2630397   | 72581966 | 3 | rs7624701  | 36826151  |
| 1 | rs2761437   | 207923081 | 1 | rs2630399   | 72582554 | 3 | rs1507870  | 36830901  |
| 1 | rs2796268   | 207925192 | 1 | rs77944304  | 72582779 | 3 | rs13072940 | 36842623  |
| 1 | rs2724384   | 207930203 | 1 | rs1385912   | 72583375 | 3 | rs931913   | 36843149  |
| 1 | rs4844390   | 207934849 | 1 | rs61765575  | 72583521 | 3 | rs11707149 | 36850490  |
| 1 | rs17006738  | 207936103 | 1 | rs2630400   | 72583763 | 3 | rs925135   | 36854253  |
| 1 | rs6671947   | 207936491 | 1 | rs1486096   | 72584184 | 3 | rs9834970  | 36856030  |
| 1 | rs11118555  | 207940853 | 1 | rs116419443 | 72584230 | 3 | rs906482   | 36856328  |
| 1 | rs11118580  | 207959070 | 1 | rs7549778   | 72585353 | 3 | rs1553656  | 36859705  |
| 1 | rs12568382  | 207966393 | 1 | rs78590455  | 72585560 | 3 | rs4072458  | 36862680  |
| 1 | rs2294911   | 207988603 | 1 | rs2821241   | 72586952 | 3 | rs4624519  | 36862980  |
| 1 | rs2235768   | 207993339 | 1 | rs7556006   | 72587186 | 3 | rs9917659  | 36864160  |
| 1 | rs2490393   | 243522906 | 1 | rs12128707  | 72588119 | 3 | rs4789     | 36869439  |
| 1 | rs10803138  | 243555219 | 1 | rs114030538 | 72588658 | 3 | rs11129735 | 36870230  |
| 1 | rs7513566   | 243588601 | 1 | rs17588812  | 72588669 | 3 | rs7652637  | 36871507  |
| 1 | rs10927013  | 243589156 | 1 | rs2821239   | 72590193 | 3 | rs12637912 | 36871894  |
| 1 | rs12140431  | 243596284 | 1 | rs2630404   | 72590286 | 3 | rs3732386  | 36871993  |
| 1 | rs2039839   | 243598670 | 1 | rs2630405   | 72590672 | 3 | rs3796186  | 36876154  |
| 1 | rs6703335   | 243608967 | 1 | rs2630406   | 72590865 | 3 | rs9811916  | 36878086  |
| 1 | rs3006925   | 243609927 | 1 | rs72682716  | 72590964 | 3 | rs4678909  | 36878563  |
| 1 | rs3006917   | 243641971 | 1 | rs2821238   | 72591103 | 3 | rs4234258  | 36878970  |
| 1 | rs1121276   | 243710407 | 1 | rs2821237   | 72591526 | 3 | rs9821223  | 36883369  |
| 1 | rs1352162   | 243717682 | 1 | rs116766293 | 72591856 | 3 | rs9882911  | 36885392  |
| 1 | rs10927039  | 243721726 | 1 | rs4649954   | 72593174 | 3 | rs4678910  | 36887973  |
| 1 | rs320308    | 243780198 | 1 | rs12141628  | 72593767 | 3 | rs17807744 | 36894048  |
| 1 | rs4614244   | 244000874 | 1 | rs115554598 | 72594798 | 3 | rs11706780 | 36896235  |
| 2 | rs1460255   | 57978858  | 1 | rs2821236   | 72595125 | 3 | rs11129743 | 36963420  |
| 2 | rs11682175  | 57987593  | 1 | rs12132602  | 72597051 | 3 | rs6806158  | 36966067  |
| 2 | rs1106090   | 58068741  | 1 | rs2821235   | 72599170 | 3 | rs9849555  | 36968309  |
| 2 | rs10167352  | 58099420  | 1 | rs7413319   | 72599191 | 3 | rs4647206  | 37037716  |
| 2 | rs118197020 | 58130326  | 1 | rs72939385  | 72601349 | 3 | rs4647226  | 37043796  |
| 2 | rs2717001   | 58137618  | 1 | rs1385911   | 72601854 | 3 | rs1799977  | 37053568  |
| 2 | rs2717002   | 58142647  | 1 | rs34124399  | 72603500 | 3 | rs6778735  | 52565100  |
| 2 | rs2678880   | 58158283  | 1 | rs1385921   | 72606298 | 3 | rs13066644 | 52565247  |
| 2 | rs2717023   | 58161355  | 1 | rs2630437   | 72606562 | 3 | rs13066389 | 52565317  |
| 2 | rs2717024   | 58161397  | 1 | rs12137663  | 72607638 | 3 | rs7614424  | 52566354  |
| 2 | rs2678889   | 58164223  | 1 | rs79169630  | 72608372 | 3 | rs7636227  | 52566682  |

|   |                |           |   |             |          |   |             |          |
|---|----------------|-----------|---|-------------|----------|---|-------------|----------|
| 2 | rs2717031      | 58166468  | 1 | rs115940302 | 72608554 | 3 | rs12489732  | 52566820 |
| 2 | rs2717040      | 58169494  | 1 | rs80106349  | 72608658 | 3 | rs7614981   | 52566914 |
| 2 | rs1568253      | 58170004  | 1 | rs12139652  | 72609333 | 3 | rs12489828  | 52567014 |
| 2 | rs1518395      | 58208074  | 1 | rs76865614  | 72609647 | 3 | rs28661185  | 52567188 |
| 2 | rs6732310      | 58210239  | 1 | rs57316908  | 72609955 | 3 | rs4687626   | 52569098 |
| 2 | rs2312147      | 58222928  | 1 | rs191755848 | 72611701 | 3 | rs60611300  | 52569949 |
| 2 | rs2056610      | 58334799  | 1 | rs1545933   | 72611715 | 3 | rs76685449  | 52570330 |
| 2 | rs1025756      | 58334925  | 1 | rs114210627 | 72611772 | 3 | rs7638808   | 52572056 |
| 2 | rs848293       | 58382490  | 1 | rs11209921  | 72612371 | 3 | rs6445528   | 52572447 |
| 2 | rs10445895     | 58390538  | 1 | rs11587895  | 72612615 | 3 | rs150774614 | 52572844 |
| 2 | rs17049408     | 58431129  | 1 | rs56256157  | 72612638 | 3 | rs60823713  | 52573101 |
| 2 | rs17049420     | 58449838  | 1 | rs7517923   | 72614077 | 3 | rs74620519  | 52573350 |
| 2 | rs6761301      | 58455672  | 1 | rs11587434  | 72615118 | 3 | rs1133415   | 52575831 |
| 2 | rs17049423     | 58461903  | 1 | rs2821300   | 72618918 | 3 | rs7643568   | 52578474 |
| 2 | rs13411119     | 58478179  | 1 | rs17589316  | 72619339 | 3 | rs6802671   | 52579288 |
| 2 | rs11689535     | 146423803 | 1 | rs2422137   | 72619961 | 3 | rs3199918   | 52581435 |
| 2 | rs6724787      | 149449185 | 1 | rs2821299   | 72621151 | 3 | rs2878628   | 52584715 |
| 2 | rs10183992     | 149452801 | 1 | rs12124523  | 72621463 | 3 | rs2251219   | 52584787 |
| 2 | rs1913807      | 162803308 | 1 | rs76290274  | 72624560 | 3 | rs1961958   | 52585990 |
| 2 | rs4664442      | 162828001 | 1 | rs11209928  | 72627031 | 3 | rs60682984  | 52586125 |
| 2 | rs2909443      | 162846439 | 1 | rs2821296   | 72629795 | 3 | rs78235335  | 52586331 |
| 2 | rs116302758    | 162904013 | 1 | rs77773765  | 72631108 | 3 | rs2336142   | 52588655 |
| 2 | rs13023106     | 185601503 | 1 | rs2901653   | 72631846 | 3 | rs80332599  | 52590568 |
| 2 | Chr2:185309826 | 185601581 | 1 | rs2630426   | 72632796 | 3 | rs6778844   | 52596398 |
| 2 | rs76903200     | 185601641 | 1 | rs2630427   | 72632799 | 3 | rs33964154  | 52596914 |
| 2 | rs10167859     | 185603817 | 1 | rs2630429   | 72633545 | 3 | rs2289249   | 52597664 |
| 2 | rs79761896     | 185604892 | 1 | rs2630430   | 72634140 | 3 | rs13060048  | 52598608 |
| 2 | rs13026742     | 185604982 | 1 | rs1157072   | 72634912 | 3 | rs13063160  | 52602274 |
| 2 | rs13001215     | 185605401 | 1 | rs2630431   | 72634986 | 3 | rs6786043   | 52604861 |
| 2 | rs6434100      | 185606004 | 1 | rs34029663  | 72635339 | 3 | rs10510759  | 52607288 |
| 2 | rs62176236     | 185607418 | 1 | rs12134600  | 72635996 | 3 | rs79658570  | 52608529 |
| 2 | rs34481141     | 185607757 | 1 | rs116255288 | 72636440 | 3 | rs74489188  | 52608672 |
| 2 | rs2170203      | 185609004 | 1 | rs61765613  | 72637154 | 3 | rs77716837  | 52609520 |
| 2 | rs116000373    | 185609452 | 1 | rs2630433   | 72638228 | 3 | rs2028220   | 52610513 |
| 2 | rs1480484      | 185609510 | 1 | rs2821295   | 72639856 | 3 | rs34735556  | 52611554 |
| 2 | rs1480485      | 185609755 | 1 | rs12117225  | 72640353 | 3 | rs11718509  | 52614670 |
| 2 | rs115082372    | 185609871 | 1 | rs79908654  | 72640442 | 3 | rs11720243  | 52618018 |
| 2 | rs62176237     | 185610069 | 1 | rs2630410   | 72641885 | 3 | rs75551918  | 52618197 |
| 2 | rs72901857     | 185612603 | 1 | rs2821293   | 72642650 | 3 | rs7614498   | 52618941 |
| 2 | rs114566971    | 185614749 | 1 | rs61765616  | 72643496 | 3 | rs12629699  | 52619836 |
| 2 | rs13384546     | 185616128 | 1 | rs12036585  | 72644116 | 3 | rs185116496 | 52621825 |
| 2 | rs13417466     | 185618111 | 1 | rs10889943  | 72644212 | 3 | rs3852066   | 52621839 |
| 2 | rs76430972     | 185619139 | 1 | rs12748679  | 72644585 | 3 | rs2590838   | 52622086 |
| 2 | rs191173608    | 185619499 | 1 | rs6699841   | 72645850 | 3 | rs144941471 | 52622568 |
| 2 | rs10190062     | 185621495 | 1 | rs4344270   | 72645960 | 3 | rs35225119  | 52623465 |
| 2 | rs10172363     | 185623051 | 1 | rs10789334  | 72647903 | 3 | rs13065744  | 52623772 |
| 2 | rs16826189     | 185623122 | 1 | rs12726084  | 72649154 | 3 | rs77711437  | 52624509 |
| 2 | rs72901873     | 185625279 | 1 | rs11209935  | 72650254 | 3 | rs2336146   | 52626646 |



|   |             |           |   |             |          |   |             |          |
|---|-------------|-----------|---|-------------|----------|---|-------------|----------|
| 2 | rs10206254  | 185626176 | 1 | rs74824226  | 72650546 | 3 | rs2577831   | 52628056 |
| 2 | rs10206426  | 185626298 | 1 | rs6668604   | 72650925 | 3 | rs2118540   | 52629386 |
| 2 | rs2369595   | 185626426 | 1 | rs78828429  | 72651233 | 3 | rs2164884   | 52629633 |
| 2 | rs77224444  | 185627257 | 1 | rs113630461 | 72652464 | 3 | rs12107484  | 52632093 |
| 2 | rs13396662  | 185627999 | 1 | rs2298152   | 72654730 | 3 | rs62253703  | 52632357 |
| 2 | rs4278895   | 185629633 | 1 | rs2821291   | 72654816 | 3 | rs114597651 | 52634050 |
| 2 | rs6712125   | 185629756 | 1 | rs2298151   | 72655369 | 3 | rs2276824   | 52637486 |
| 2 | rs72901885  | 185630024 | 1 | rs6672863   | 72655636 | 3 | rs34341044  | 52637631 |
| 2 | rs72901889  | 185632346 | 1 | rs2821290   | 72656205 | 3 | rs3774366   | 52641255 |
| 2 | rs6728615   | 185632513 | 1 | rs1342862   | 72657058 | 3 | rs78410573  | 52641568 |
| 2 | rs10177035  | 185633046 | 1 | rs2153929   | 72658214 | 3 | rs71299610  | 52641703 |
| 2 | rs6732176   | 185633109 | 1 | rs34289700  | 72660048 | 3 | rs3774365   | 52642487 |
| 2 | rs72901891  | 185633794 | 1 | rs2821288   | 72661104 | 3 | rs12487591  | 52642936 |
| 2 | rs115682664 | 185633796 | 1 | rs6656980   | 72661288 | 3 | rs3755806   | 52643685 |
| 2 | rs72901893  | 185634241 | 1 | rs34840702  | 72662959 | 3 | rs6803492   | 52649090 |
| 2 | rs10194277  | 185634659 | 1 | rs7518919   | 72663249 | 3 | rs13083798  | 52649748 |
| 2 | rs10174301  | 185635853 | 1 | rs112593979 | 72663293 | 3 | rs10510760  | 52650348 |
| 2 | rs6759491   | 185636177 | 1 | rs12141242  | 72663576 | 3 | rs77810318  | 52650919 |
| 2 | rs62176239  | 185636567 | 1 | rs2821287   | 72663761 | 3 | rs62253734  | 52653645 |
| 2 | rs6716151   | 185636617 | 1 | rs1342874   | 72664938 | 3 | rs60256157  | 52656491 |
| 2 | rs72901901  | 185637164 | 1 | rs35944729  | 72666431 | 3 | rs75246353  | 52656781 |
| 2 | rs17617913  | 185638875 | 1 | rs2821285   | 72667196 | 3 | rs13064064  | 52657002 |
| 2 | rs78011041  | 185639136 | 1 | rs2821284   | 72669322 | 3 | rs61538294  | 52659594 |
| 2 | rs10196799  | 185640728 | 1 | rs9425076   | 72669968 | 3 | rs1561337   | 52659963 |
| 2 | rs116775825 | 185641160 | 1 | rs7349073   | 72670841 | 3 | rs79457385  | 52660127 |
| 2 | rs12693389  | 185641495 | 1 | rs2821283   | 72673061 | 3 | rs184514749 | 52661018 |
| 2 | rs72903709  | 185641564 | 1 | rs2797540   | 72673194 | 3 | rs7622694   | 52663882 |
| 2 | rs10176668  | 185641635 | 1 | rs1858601   | 72674434 | 3 | rs78506463  | 52664168 |
| 2 | rs6434102   | 185642580 | 1 | rs1858600   | 72674489 | 3 | rs78842975  | 52667856 |
| 2 | rs13018902  | 185642880 | 1 | rs74653947  | 72676153 | 3 | rs2083180   | 52668119 |
| 2 | rs17431119  | 185642960 | 1 | rs12725081  | 72682718 | 3 | rs17052357  | 52668638 |
| 2 | rs17431132  | 185644113 | 1 | rs1675356   | 72683226 | 3 | rs13068293  | 52672167 |
| 2 | rs17431153  | 185644845 | 1 | rs61765640  | 72684333 | 3 | rs11130312  | 52675055 |
| 2 | rs13010468  | 185645106 | 1 | rs115533964 | 72686098 | 3 | rs11130313  | 52676190 |
| 2 | rs10497657  | 185645840 | 1 | rs34274959  | 72686292 | 3 | rs13099479  | 52677478 |
| 2 | rs10497658  | 185646020 | 1 | rs1194286   | 72688503 | 3 | rs13085895  | 52678270 |
| 2 | rs13017390  | 185646076 | 1 | rs1194285   | 72689238 | 3 | rs2028216   | 52680823 |
| 2 | rs1987025   | 185647595 | 1 | rs183010826 | 72689886 | 3 | rs2289250   | 52682946 |
| 2 | rs17584494  | 185647985 | 1 | rs1675353   | 72691347 | 3 | rs33967311  | 52683864 |
| 2 | rs72903727  | 185648068 | 1 | rs72682744  | 72692101 | 3 | rs934839    | 52683898 |
| 2 | rs10497659  | 185648256 | 1 | rs12125336  | 72692630 | 3 | rs80214269  | 52688746 |
| 2 | rs116774374 | 185649149 | 1 | rs34940719  | 72693786 | 3 | rs12486847  | 52691112 |
| 2 | rs10497660  | 185649196 | 1 | rs1205484   | 72695547 | 3 | rs2590846   | 52692359 |
| 2 | rs1317210   | 185649555 | 1 | rs78152876  | 72696649 | 3 | rs56665533  | 52692725 |
| 2 | rs1320080   | 185650005 | 1 | rs77516608  | 72696845 | 3 | rs78059582  | 52693216 |
| 2 | rs17431258  | 185650079 | 1 | rs11209938  | 72697178 | 3 | rs6804145   | 52694198 |
| 2 | rs72903735  | 185650668 | 1 | rs985227    | 72697459 | 3 | rs11715796  | 52695650 |
| 2 | rs72903737  | 185651328 | 1 | rs2797543   | 72701100 | 3 | rs7651709   | 52695861 |

|   |             |           |   |             |          |   |              |          |
|---|-------------|-----------|---|-------------|----------|---|--------------|----------|
| 2 | rs10195510  | 185652653 | 1 | rs1194270   | 72702313 | 3 | rs72950432   | 52696352 |
| 2 | rs6716235   | 185655092 | 1 | rs1194269   | 72703860 | 3 | rs11130314   | 52697082 |
| 2 | rs12693391  | 185655189 | 1 | rs1194267   | 72704526 | 3 | rs79993196   | 52697566 |
| 2 | rs4635495   | 185655317 | 1 | rs185945186 | 72705230 | 3 | rs71299613   | 52698805 |
| 2 | rs34327168  | 185656085 | 1 | rs113371150 | 72707049 | 3 | rs1992193    | 52699089 |
| 2 | rs34963004  | 185656366 | 1 | rs1194265   | 72707226 | 3 | rs2577842    | 52700984 |
| 2 | rs34452663  | 185656920 | 1 | rs1026567   | 72708584 | 3 | rs73078833   | 52703691 |
| 2 | rs72903752  | 185659789 | 1 | rs1026566   | 72709042 | 3 | rs12496476   | 52708737 |
| 2 | rs62176259  | 185663735 | 1 | rs72682752  | 72710713 | 3 | rs73078835   | 52709711 |
| 2 | rs4294964   | 185664579 | 1 | rs9425080   | 72711900 | 3 | rs114180403  | 52709810 |
| 2 | rs72903765  | 185664802 | 1 | rs17525406  | 72712003 | 3 | rs180905584  | 52709850 |
| 2 | rs62178060  | 185665080 | 1 | rs2066416   | 72712404 | 3 | rs62255368   | 52710172 |
| 2 | rs72903769  | 185665389 | 1 | rs1194284   | 72712529 | 3 | rs72950437   | 52714400 |
| 2 | rs6751335   | 185669127 | 1 | rs2126077   | 72712607 | 3 | rs78892252   | 52715311 |
| 2 | rs10211213  | 185670083 | 1 | rs1194283   | 72713037 | 3 | rs3733039    | 52719088 |
| 2 | rs13012893  | 185670332 | 1 | rs9424976   | 72718610 | 3 | rs1108842    | 52720080 |
| 2 | rs74961493  | 185670496 | 1 | rs17591264  | 72723236 | 3 | rs111177     | 52721305 |
| 2 | rs13012514  | 185672183 | 1 | rs2000228   | 72723863 | 3 | rs35911561   | 52722562 |
| 2 | rs72903776  | 185672750 | 1 | rs34723450  | 72724409 | 3 | rs1315803266 | 52723309 |
| 2 | rs72903778  | 185673214 | 1 | rs77642121  | 72725232 | 3 | rs6762813    | 52726695 |
| 2 | rs72903783  | 185673390 | 1 | rs9424977   | 72725344 | 3 | rs2289247    | 52727257 |
| 2 | rs72903786  | 185674302 | 1 | rs1620977   | 72729142 | 3 | rs4532127    | 52727736 |
| 2 | rs17509336  | 185677806 | 1 | rs17525824  | 72731621 | 3 | rs6976       | 52728804 |
| 2 | rs17431278  | 185678006 | 1 | rs1841500   | 72732323 | 3 | rs56156188   | 52730699 |
| 2 | rs72903792  | 185679980 | 1 | rs1460947   | 72732482 | 3 | rs139683420  | 52730946 |
| 2 | rs10201360  | 185680799 | 1 | rs1460948   | 72732574 | 3 | rs2164885    | 52731269 |
| 2 | rs13408744  | 185681052 | 1 | rs9424978   | 72732923 | 3 | rs11130317   | 52731483 |
| 2 | rs72903798  | 185681546 | 1 | rs1380995   | 72733841 | 3 | rs13081155   | 52732429 |
| 2 | rs17584522  | 185681730 | 1 | rs116244409 | 72735434 | 3 | rs3075809    | 52733082 |
| 2 | rs13386789  | 185681984 | 1 | rs12137231  | 72735458 | 3 | rs6765687    | 52733106 |
| 2 | rs62174661  | 185687954 | 1 | rs34376163  | 72738699 | 3 | rs8906       | 52739520 |
| 2 | rs35105890  | 185688786 | 1 | rs12737564  | 72739527 | 3 | rs6617       | 52740182 |
| 2 | rs189530005 | 185689599 | 1 | rs12127789  | 72740073 | 3 | rs79633493   | 52741032 |
| 2 | rs4544394   | 185689671 | 1 | rs114308590 | 72740282 | 3 | rs3755798    | 52741160 |
| 2 | rs72905716  | 185690060 | 1 | rs11584542  | 72741382 | 3 | rs34017441   | 52742413 |
| 2 | rs9973631   | 185690911 | 1 | rs11584611  | 72741829 | 3 | rs115738369  | 52743289 |
| 2 | rs72905722  | 185691444 | 1 | rs9425081   | 72742235 | 3 | rs34182518   | 52743854 |
| 2 | rs13424507  | 185691625 | 1 | rs3101340   | 72744144 | 3 | rs13079063   | 52744460 |
| 2 | rs9973668   | 185692497 | 1 | rs34874247  | 72744950 | 3 | rs11235      | 52745087 |
| 2 | rs13028349  | 185693549 | 1 | rs1870676   | 72744996 | 3 | rs145014080  | 52747486 |
| 2 | rs76585359  | 185695954 | 1 | rs34579341  | 72745962 | 3 | rs2878726    | 52748271 |
| 2 | rs16826219  | 185696114 | 1 | rs77709389  | 72746633 | 3 | rs11716747   | 52748857 |
| 2 | rs72905730  | 185696271 | 1 | rs3101341   | 72747844 | 3 | rs35526119   | 52749334 |
| 2 | rs12693395  | 185696607 | 1 | rs76659454  | 72749726 | 3 | rs60770874   | 52750199 |
| 2 | rs116351004 | 185697406 | 1 | rs3128341   | 72749848 | 3 | rs116493126  | 52750325 |
| 2 | rs17509517  | 185700607 | 1 | rs3101338   | 72750353 | 3 | rs7624716    | 52751534 |
| 2 | rs62174663  | 185700770 | 1 | rs34361149  | 72750470 | 3 | rs115745575  | 52753308 |
| 2 | rs72905736  | 185701858 | 1 | rs11209943  | 72750500 | 3 | rs56196917   | 52756045 |

|   |             |           |   |             |          |   |             |          |
|---|-------------|-----------|---|-------------|----------|---|-------------|----------|
| 2 | rs115103722 | 185702685 | 1 | rs3101337   | 72751134 | 3 | rs72960240  | 52759133 |
| 2 | rs7605689   | 185705856 | 1 | rs3101336   | 72751185 | 3 | rs13063138  | 52759254 |
| 2 | rs72905739  | 185706202 | 1 | rs2613499   | 72751552 | 3 | rs13087538  | 52763453 |
| 2 | rs10180597  | 185708432 | 1 | rs2815765   | 72752230 | 3 | rs6769720   | 52764350 |
| 2 | rs7603015   | 185708987 | 1 | rs2613498   | 72752939 | 3 | rs10780035  | 52764624 |
| 2 | rs10187190  | 185710178 | 1 | rs61765650  | 72753112 | 3 | rs73078847  | 52764787 |
| 2 | rs72905751  | 185713166 | 1 | rs2568953   | 72753956 | 3 | rs2268027   | 52766606 |
| 2 | rs72905753  | 185713304 | 1 | rs61765651  | 72754314 | 3 | rs767418    | 52767427 |
| 2 | rs57491014  | 185717491 | 1 | rs2613496   | 72754788 | 3 | rs1231194   | 52769047 |
| 2 | rs7578316   | 185718167 | 1 | rs2568952   | 72755105 | 3 | rs11130323  | 52770277 |
| 2 | rs80268465  | 185719122 | 1 | rs114171655 | 72759564 | 3 | rs56276589  | 52772198 |
| 2 | rs12693396  | 185719174 | 1 | rs2815757   | 72764289 | 3 | rs34184137  | 52774017 |
| 2 | rs75530945  | 185720402 | 1 | rs2568956   | 72764376 | 3 | rs75321479  | 52778210 |
| 2 | rs55941754  | 185720926 | 1 | rs2568957   | 72764430 | 3 | rs2268026   | 52778347 |
| 2 | rs72905773  | 185721156 | 1 | rs78778221  | 72764809 | 3 | rs60058353  | 52778409 |
| 2 | rs13386192  | 185722380 | 1 | rs9425089   | 72765082 | 3 | rs2072390   | 52780509 |
| 2 | rs72905777  | 185722863 | 1 | rs2568958   | 72765116 | 3 | rs6762788   | 52792311 |
| 2 | rs7593307   | 185724193 | 1 | rs9425090   | 72765300 | 3 | rs1029871   | 52797634 |
| 2 | rs12693397  | 185724435 | 1 | rs9424981   | 72766085 | 3 | rs72960281  | 52802871 |
| 2 | rs72905782  | 185724464 | 1 | rs185397415 | 72811839 | 3 | rs13071584  | 52804487 |
| 2 | rs72905784  | 185724642 | 1 | rs11209948  | 72811904 | 3 | rs998909    | 52805093 |
| 2 | rs13396624  | 185725062 | 1 | rs78095791  | 72811957 | 3 | rs11717836  | 52807736 |
| 2 | rs72905785  | 185725119 | 1 | rs2815753   | 72812324 | 3 | rs72960285  | 52807816 |
| 2 | rs72905786  | 185725574 | 1 | rs2815752   | 72812440 | 3 | rs1014969   | 52808341 |
| 2 | rs7585171   | 185725617 | 1 | rs2613494   | 72812657 | 3 | rs3755799   | 52809193 |
| 2 | rs72905792  | 185726138 | 1 | rs2568961   | 72812747 | 3 | rs2019065   | 52809525 |
| 2 | rs72905794  | 185726221 | 1 | rs6682389   | 72813057 | 3 | rs62255400  | 52812231 |
| 2 | rs62200788  | 185727845 | 1 | rs1460943   | 72813129 | 3 | rs75097760  | 52814643 |
| 2 | rs72905797  | 185727861 | 1 | rs1432639   | 72813218 | 3 | rs36012032  | 52814709 |
| 2 | rs7558878   | 185729162 | 1 | rs1460942   | 72813256 | 3 | rs2710323   | 52815905 |
| 2 | rs11890843  | 185729304 | 1 | rs1460940   | 72814617 | 3 | rs187624109 | 52816588 |
| 2 | rs13398732  | 185730587 | 1 | rs2815749   | 72814783 | 3 | rs2710322   | 52817593 |
| 2 | rs17509601  | 185731901 | 1 | rs2815748   | 72816147 | 3 | rs3774354   | 52817675 |
| 2 | rs17509608  | 185732578 | 1 | rs6690399   | 72817099 | 3 | rs3774355   | 52817778 |
| 2 | rs13401381  | 185734749 | 1 | rs17526561  | 72818226 | 3 | rs11715487  | 52818301 |
| 2 | rs7588907   | 185735599 | 1 | rs2012697   | 72819612 | 3 | rs2239551   | 52818579 |
| 2 | rs17509622  | 185735643 | 1 | rs2815747   | 72821126 | 3 | rs2268023   | 52819327 |
| 2 | rs7564941   | 185735813 | 1 | rs12143571  | 72822096 | 3 | rs2535630   | 52819883 |
| 2 | rs10199843  | 185736625 | 1 | rs12117438  | 72822479 | 3 | rs678       | 52820981 |
| 2 | rs6709436   | 185738633 | 1 | rs137935824 | 72822917 | 3 | rs1042779   | 52821011 |
| 2 | rs11902536  | 185738735 | 1 | rs990871    | 72823713 | 3 | rs2286798   | 52821177 |
| 2 | rs1366845   | 185739226 | 1 | rs6687024   | 72824860 | 3 | rs111477914 | 52821666 |
| 2 | rs77689531  | 185741079 | 1 | rs12143898  | 72826172 | 3 | rs68094128  | 52821993 |
| 2 | rs17431603  | 185741744 | 1 | rs78120369  | 72826945 | 3 | rs2239550   | 52822509 |
| 2 | rs115166888 | 185741898 | 1 | rs6660464   | 72826949 | 3 | rs2300149   | 52822921 |
| 2 | rs72907715  | 185742038 | 1 | rs76611872  | 72827037 | 3 | rs2239549   | 52823126 |
| 2 | rs1366843   | 185742271 | 1 | rs76455638  | 72827501 | 3 | rs4687550   | 52823430 |
| 2 | rs1820847   | 185742474 | 1 | rs12139531  | 72827776 | 3 | rs4687551   | 52823448 |

|   |             |           |   |             |          |   |            |           |
|---|-------------|-----------|---|-------------|----------|---|------------|-----------|
| 2 | rs4586602   | 185742794 | 1 | rs115720372 | 72829015 | 3 | rs2270197  | 52824095  |
| 2 | rs72907717  | 185742905 | 1 | rs11581382  | 72829347 | 3 | rs1076425  | 52825462  |
| 2 | rs13411652  | 185743241 | 1 | rs11209950  | 72829680 | 3 | rs1075653  | 52825528  |
| 2 | rs1429427   | 185743953 | 1 | rs72943001  | 72831388 | 3 | rs9324     | 52825585  |
| 2 | rs34233935  | 185744192 | 1 | rs12123328  | 72833201 | 3 | rs7549     | 52825912  |
| 2 | rs10206265  | 185744352 | 1 | rs74820801  | 72833505 | 3 | rs2071506  | 52826276  |
| 2 | rs112869258 | 185745353 | 1 | rs2613505   | 72835410 | 3 | rs746694   | 52826620  |
| 2 | rs112372472 | 185745500 | 1 | rs2613504   | 72835740 | 3 | rs2071507  | 52826707  |
| 2 | rs72907724  | 185748032 | 1 | rs7531118   | 72837239 | 3 | rs2071508  | 52826846  |
| 2 | rs72907728  | 185749875 | 1 | rs11209951  | 72837490 | 3 | rs4687654  | 52827566  |
| 2 | rs34044253  | 185750030 | 1 | rs72684612  | 72837777 | 3 | rs2239699  | 52827915  |
| 2 | rs11899082  | 185754482 | 1 | rs10789336  | 72838406 | 3 | rs9881468  | 52828628  |
| 2 | rs114385979 | 185754801 | 1 | rs1993709   | 72838529 | 3 | rs56009954 | 52829607  |
| 2 | rs150700380 | 185755435 | 1 | rs4322186   | 72838561 | 3 | rs2240921  | 52830764  |
| 2 | rs13429132  | 185756725 | 1 | rs2613503   | 72839774 | 3 | rs2240920  | 52831009  |
| 2 | rs13428955  | 185756744 | 1 | rs79547900  | 72841201 | 3 | rs62255413 | 52831386  |
| 2 | rs12693399  | 185757011 | 1 | rs72684614  | 72842892 | 3 | rs2240919  | 52831701  |
| 2 | rs12693400  | 185758412 | 1 | rs72945111  | 72845176 | 3 | rs2535629  | 52833219  |
| 2 | rs6715910   | 185758901 | 1 | rs72945113  | 72845264 | 3 | rs3617     | 52833805  |
| 2 | rs34700435  | 185758973 | 1 | rs114116549 | 72859448 | 3 | rs9848554  | 52836337  |
| 2 | rs12999259  | 185759675 | 1 | rs114950370 | 72860308 | 3 | rs17331151 | 52844534  |
| 2 | rs113113034 | 185760985 | 1 | rs1460939   | 72861567 | 3 | rs4687657  | 52852538  |
| 2 | rs6718067   | 185761264 | 1 | rs12123766  | 72861847 | 3 | rs2239547  | 52855229  |
| 2 | rs72907741  | 185761731 | 1 | rs7551291   | 72865128 | 3 | rs2276816  | 52860816  |
| 2 | rs7584503   | 185761922 | 1 | rs1599334   | 72866574 | 3 | rs2276817  | 52860936  |
| 2 | rs116715697 | 185762217 | 1 | rs78086129  | 72867555 | 3 | rs4687554  | 52864135  |
| 2 | rs6722425   | 185762587 | 1 | rs115781967 | 72871716 | 3 | rs13083728 | 52868445  |
| 2 | rs6710286   | 185762811 | 1 | rs76827956  | 72872889 | 3 | rs1573815  | 52870132  |
| 2 | rs3931790   | 185763376 | 1 | rs1838662   | 72874257 | 3 | rs1139106  | 52871101  |
| 2 | rs7562384   | 185763445 | 1 | rs12406365  | 72874258 | 3 | rs3733047  | 52871929  |
| 2 | rs72907747  | 185765063 | 1 | rs12139940  | 72875061 | 3 | rs6445539  | 52874296  |
| 2 | rs1344707   | 185766001 | 1 | rs10789338  | 72875201 | 3 | rs11720228 | 52877270  |
| 2 | rs7603001   | 185766816 | 1 | rs11209961  | 72875646 | 3 | rs13080929 | 52885112  |
| 2 | rs7590852   | 185766912 | 1 | rs290703    | 72876286 | 3 | rs3796352  | 52913279  |
| 2 | rs12693401  | 185767283 | 1 | rs290702    | 72876346 | 3 | rs3733034  | 52952433  |
| 2 | rs72907756  | 185767291 | 1 | rs115771589 | 72877798 | 3 | rs10510761 | 52965255  |
| 2 | rs1366840   | 185767854 | 1 | rs17092655  | 72877899 | 3 | rs11710394 | 53015839  |
| 2 | rs10931155  | 185768559 | 1 | rs72684636  | 72878664 | 3 | rs2581824  | 53022408  |
| 2 | rs72907759  | 185769129 | 1 | rs17092663  | 72879614 | 3 | rs2255107  | 53060637  |
| 2 | rs72907760  | 185769130 | 1 | rs115781252 | 72880148 | 3 | rs9847710  | 53062661  |
| 2 | rs10497661  | 185769199 | 1 | rs17092672  | 72880428 | 3 | rs2581806  | 53063360  |
| 2 | rs77076543  | 185769746 | 1 | rs7532281   | 72882343 | 3 | rs697962   | 107618914 |
| 2 | rs10497662  | 185769921 | 1 | rs115335794 | 72882463 | 3 | rs709514   | 107620896 |
| 2 | rs1835172   | 185770241 | 1 | rs11209963  | 72883303 | 3 | rs4855779  | 107646728 |
| 2 | rs4666994   | 185771745 | 1 | rs76696481  | 72884606 | 3 | rs9845309  | 107708956 |
| 2 | rs4666995   | 185771790 | 1 | rs10789339  | 72884712 | 3 | rs1344877  | 107737386 |
| 2 | rs115515236 | 185772643 | 1 | rs11209964  | 72885087 | 3 | rs6790456  | 107739094 |
| 2 | rs72907766  | 185772976 | 1 | rs11209964  | 72885098 | 3 | rs7622560  | 107744023 |

|   |             |           |   |             |          |   |            |           |
|---|-------------|-----------|---|-------------|----------|---|------------|-----------|
| 2 | rs66970879  | 185773132 | 1 | rs2590942   | 72885281 | 3 | rs11712272 | 107747672 |
| 2 | rs66726164  | 185773141 | 1 | rs7549534   | 72885969 | 3 | rs7635063  | 107818777 |
| 2 | rs66473204  | 185773243 | 1 | rs6673910   | 72886559 | 3 | rs7640424  | 107820063 |
| 2 | rs17431742  | 185773401 | 1 | rs112265677 | 72887660 | 3 | rs17828045 | 107821546 |
| 2 | rs1114248   | 185774139 | 1 | rs116152102 | 72896151 | 3 | rs6795280  | 107876232 |
| 2 | rs78773484  | 185777032 | 1 | rs79499349  | 72896317 | 3 | rs12632400 | 107941614 |
| 2 | rs72893066  | 185778156 | 1 | rs72945146  | 72896381 | 3 | rs12493468 | 108012420 |
| 2 | rs725617    | 185778262 | 1 | rs2422221   | 72896654 | 4 | rs1523562  | 162088541 |
| 2 | rs1344706   | 185778428 | 1 | rs980243    | 72897106 | 4 | rs2872188  | 162107994 |
| 2 | rs13009002  | 185778602 | 1 | rs112590630 | 72897477 | 4 | rs13110266 | 162129844 |
| 2 | rs72893068  | 185778772 | 1 | rs77981679  | 72897673 | 4 | rs6536580  | 162134859 |
| 2 | rs115456739 | 185779904 | 1 | rs12143162  | 72897687 | 4 | rs1444285  | 162163105 |
| 2 | rs4666998   | 185780221 | 1 | rs1445582   | 72897985 | 4 | rs7700001  | 162200085 |
| 2 | rs13423388  | 185780225 | 1 | rs76195116  | 72898425 | 4 | rs9308024  | 162207646 |
| 2 | rs72893071  | 185781197 | 1 | rs782257    | 72899059 | 4 | rs12510294 | 162234287 |
| 2 | rs62198463  | 185781300 | 1 | rs113837642 | 72899299 | 4 | rs976972   | 162244482 |
| 2 | rs73043287  | 185782186 | 1 | rs1445581   | 72899359 | 4 | rs7689446  | 162263362 |
| 2 | rs1583048   | 185783141 | 1 | rs12404629  | 72899477 | 4 | rs2314143  | 162282165 |
| 2 | rs1366839   | 185783666 | 1 | rs74909863  | 72900414 | 4 | rs12505871 | 162369349 |
| 2 | rs1366838   | 185783896 | 1 | rs992956    | 72901141 | 4 | rs12512161 | 162371431 |
| 2 | rs115151279 | 185784128 | 1 | rs114086144 | 72901383 | 4 | rs17041096 | 162383466 |
| 2 | rs17662626  | 193984621 | 1 | rs12133881  | 72906742 | 4 | rs4373120  | 162411391 |
| 2 | rs6738721   | 198182334 | 1 | rs2121056   | 72906786 | 4 | rs4518198  | 162426629 |
| 2 | rs6434926   | 198185078 | 1 | rs782239    | 72908137 | 4 | rs16999330 | 162460563 |
| 2 | rs3097385   | 198199297 | 1 | rs111616364 | 72908144 | 4 | rs4501178  | 162477082 |
| 2 | rs3849361   | 198288826 | 1 | rs112397929 | 72908616 | 4 | rs10517746 | 162521710 |
| 2 | rs3731570   | 198317783 | 1 | rs7534013   | 72909011 | 5 | rs1505088  | 7360543   |
| 2 | rs17731449  | 198465840 | 1 | rs4649956   | 72909435 | 5 | rs12514566 | 7391462   |
| 2 | rs2045245   | 198485341 | 1 | rs12026130  | 72910098 | 5 | rs13153439 | 7398546   |
| 2 | rs13000656  | 198522126 | 1 | rs10889955  | 72910182 | 5 | rs7733194  | 7441829   |
| 2 | rs10497807  | 198585087 | 1 | rs782252    | 72911829 | 5 | rs17228455 | 7458019   |
| 2 | rs13012441  | 198603121 | 1 | rs12119736  | 72912656 | 5 | rs7712809  | 7459043   |
| 2 | rs13425988  | 198622378 | 1 | rs7535539   | 72913499 | 5 | rs17229159 | 7475407   |
| 2 | rs700648    | 198622636 | 1 | rs7547113   | 72913603 | 5 | rs10462842 | 7517897   |
| 2 | rs700651    | 198631714 | 1 | rs111760100 | 72915131 | 5 | rs2173701  | 7540884   |
| 2 | rs4550664   | 198691405 | 1 | rs112914908 | 72915699 | 5 | rs7720767  | 7546394   |
| 2 | rs700680    | 198707950 | 1 | rs113421220 | 72915720 | 5 | rs7700862  | 7646404   |
| 2 | rs700688    | 198723833 | 1 | rs782246    | 72915804 | 5 | rs2973322  | 7652518   |
| 2 | rs4850812   | 198743655 | 1 | rs782245    | 72915844 | 5 | rs877886   | 7659279   |
| 2 | rs1464211   | 198798630 | 1 | rs782243    | 72916538 | 5 | rs1428526  | 7689267   |
| 2 | rs1518367   | 198807015 | 1 | rs782242    | 72916574 | 5 | rs4235587  | 7734493   |
| 2 | rs2166517   | 200190213 | 1 | rs78931181  | 72916577 | 5 | rs1460970  | 7794738   |
| 2 | rs1348812   | 200236425 | 1 | rs12759396  | 72921381 | 5 | rs6864771  | 7797291   |
| 2 | rs16831510  | 200305460 | 1 | rs75365549  | 72921464 | 5 | rs16879141 | 7801371   |
| 2 | rs17590956  | 200720420 | 1 | rs77328742  | 72923408 | 5 | rs13162758 | 7801608   |
| 2 | rs17529746  | 200726221 | 1 | rs782221    | 72924057 | 5 | rs3756636  | 80546499  |
| 2 | rs769950    | 200730028 | 1 | rs78568434  | 72924558 | 5 | rs1039326  | 80609768  |
| 2 | rs281783    | 200751582 | 1 | rs4650138   | 72924689 | 5 | rs6885028  | 80612085  |

|   |             |           |   |             |          |   |             |          |
|---|-------------|-----------|---|-------------|----------|---|-------------|----------|
| 2 | rs1124639   | 200775744 | 1 | rs782219    | 72924810 | 5 | rs10056565  | 80619046 |
| 2 | rs10498163  | 225434445 | 1 | rs6698502   | 72925024 | 5 | rs6881927   | 80629372 |
| 2 | rs12052869  | 233591551 | 1 | rs782218    | 72925397 | 5 | rs6452399   | 80631511 |
| 2 | rs8192539   | 233632766 | 1 | rs61771778  | 72926855 | 5 | rs10371     | 80631642 |
| 2 | rs7593642   | 233682722 | 1 | rs1838658   | 72928467 | 5 | rs6885431   | 80633196 |
| 2 | rs6751801   | 233697200 | 1 | rs79334904  | 72930595 | 5 | rs4235653   | 80637529 |
| 2 | rs778341    | 233728801 | 1 | rs7534853   | 72934011 | 5 | rs7735423   | 80644174 |
| 2 | rs2675968   | 233736244 | 1 | rs6692258   | 72934320 | 5 | rs10942262  | 80675496 |
| 2 | rs778370    | 233743363 | 1 | rs10889956  | 72936345 | 5 | rs12187063  | 80871602 |
| 2 | rs709937    | 233744021 | 1 | rs1822981   | 72936795 | 5 | rs7720445   | 80901915 |
| 2 | rs2675954   | 233750627 | 1 | rs1822980   | 72936801 | 5 | rs447574    | 80937152 |
| 3 | rs17620999  | 2561556   | 1 | rs949773    | 72937078 | 6 | rs10942953  | 72269473 |
| 3 | rs11128821  | 17330693  | 1 | rs1807758   | 72937523 | 6 | rs2087092   | 72269581 |
| 3 | rs283932    | 17364413  | 1 | rs7530496   | 72937842 | 6 | rs72651689  | 72269625 |
| 3 | rs17200795  | 17402592  | 1 | rs10889957  | 72938027 | 6 | rs80295642  | 72270151 |
| 3 | rs12496758  | 17644775  | 1 | rs10493498  | 72938249 | 6 | rs61160900  | 72270782 |
| 3 | rs7620425   | 17848474  | 1 | rs1418621   | 72938679 | 6 | rs10455238  | 72271845 |
| 3 | rs11707149  | 36850490  | 1 | rs7536869   | 72939855 | 6 | rs72651700  | 72273244 |
| 3 | rs925135    | 36854253  | 1 | rs10789340  | 72940273 | 6 | rs72651701  | 72273258 |
| 3 | rs9834970   | 36856030  | 1 | rs61771792  | 72940536 | 6 | rs28822989  | 72273801 |
| 3 | rs906482    | 36856328  | 1 | rs80022132  | 72941784 | 6 | rs12216174  | 72274288 |
| 3 | rs1553656   | 36859705  | 1 | rs74089203  | 72941970 | 6 | rs72653105  | 72274711 |
| 3 | rs4072458   | 36862680  | 1 | rs112552181 | 72942362 | 6 | rs116067179 | 72274843 |
| 3 | rs4624519   | 36862980  | 1 | rs80214517  | 72942781 | 6 | rs79206107  | 72274870 |
| 3 | rs9917659   | 36864160  | 1 | rs12408088  | 72942878 | 6 | rs60965402  | 72275033 |
| 3 | rs4789      | 36869439  | 1 | rs79197341  | 72944025 | 6 | rs75117691  | 72275124 |
| 3 | rs11129735  | 36870230  | 1 | rs7550173   | 72944617 | 6 | rs59637520  | 72275466 |
| 3 | rs7652637   | 36871507  | 1 | rs11209972  | 72944714 | 6 | rs2101382   | 72275927 |
| 3 | rs12637912  | 36871894  | 1 | rs12033462  | 72947342 | 6 | rs72653112  | 72276608 |
| 3 | rs3732386   | 36871993  | 1 | rs75129760  | 72947691 | 6 | rs1855431   | 72278314 |
| 3 | rs3796186   | 36876154  | 1 | rs1031188   | 72948540 | 6 | rs78851178  | 72278433 |
| 3 | rs9811916   | 36878086  | 1 | rs17092792  | 72948800 | 6 | rs11963624  | 72278541 |
| 3 | rs4678909   | 36878563  | 1 | rs75324010  | 72949049 | 6 | rs76683562  | 72278990 |
| 3 | rs4234258   | 36878970  | 1 | rs707444    | 72949290 | 6 | rs9358960   | 72279021 |
| 3 | rs9821223   | 36883369  | 1 | rs78506678  | 72949727 | 6 | rs77354299  | 72279402 |
| 3 | rs9882911   | 36885392  | 1 | rs4649957   | 72949748 | 6 | rs72653118  | 72279846 |
| 3 | rs4678910   | 36887973  | 1 | rs1822979   | 72951344 | 6 | rs4707922   | 72281932 |
| 3 | rs17807744  | 36894048  | 1 | rs17097721  | 72951777 | 6 | rs16881513  | 72282786 |
| 3 | rs11706780  | 36896235  | 1 | rs78765738  | 72952053 | 6 | rs9342853   | 72282925 |
| 3 | rs41292372  | 52541937  | 1 | rs17092800  | 72952117 | 6 | rs9351828   | 72286607 |
| 3 | rs1010554   | 52542919  | 1 | rs782208    | 72953022 | 6 | rs6914250   | 72286838 |
| 3 | rs9835659   | 52544470  | 1 | rs782207    | 72953251 | 6 | rs72653119  | 72287771 |
| 3 | rs115217609 | 52545370  | 1 | rs76179389  | 72953323 | 6 | rs16881519  | 72288333 |
| 3 | rs7644763   | 52546487  | 1 | rs74546891  | 72953435 | 6 | rs80241482  | 72289367 |
| 3 | rs2015971   | 52546820  | 1 | rs813004    | 72954611 | 6 | rs6927647   | 72289651 |
| 3 | rs740903    | 52548818  | 1 | rs2218500   | 72954641 | 6 | rs1486596   | 72290080 |
| 3 | rs41292858  | 52548873  | 1 | rs6692386   | 72954883 | 6 | rs12210828  | 72290462 |
| 3 | rs79979130  | 52551010  | 1 | rs4545290   | 72955823 | 6 | rs75793671  | 72290713 |

|   |             |          |   |             |           |   |             |          |
|---|-------------|----------|---|-------------|-----------|---|-------------|----------|
| 3 | rs66824127  | 52551265 | 1 | rs10493499  | 72955990  | 6 | rs9446417   | 72291479 |
| 3 | rs67409736  | 52551284 | 1 | rs812462    | 72956037  | 6 | rs9446418   | 72291534 |
| 3 | rs56960576  | 52553167 | 1 | rs782205    | 72956078  | 6 | rs12214683  | 72292465 |
| 3 | rs186689880 | 52553628 | 1 | rs61771794  | 72956259  | 6 | rs60181928  | 72292687 |
| 3 | rs191127022 | 52553629 | 1 | rs61771795  | 72956912  | 6 | rs1032166   | 72293273 |
| 3 | rs13081028  | 52555316 | 1 | rs61771798  | 72958702  | 6 | rs12528750  | 72293746 |
| 3 | rs9853056   | 52555957 | 1 | rs72684685  | 72958905  | 6 | rs12529063  | 72293855 |
| 3 | rs35325270  | 52556369 | 1 | rs782233    | 72984094  | 6 | rs6925362   | 72294350 |
| 3 | rs4434138   | 52556890 | 1 | rs17543217  | 72994090  | 6 | rs62404288  | 72295061 |
| 3 | rs4234633   | 52557038 | 1 | rs782262    | 73009278  | 6 | rs12183351  | 72295183 |
| 3 | rs13303     | 52558008 | 1 | rs12142193  | 73025079  | 6 | rs78814809  | 72295211 |
| 3 | rs13621     | 52558133 | 1 | rs4130885   | 73575075  | 6 | rs73750712  | 72296032 |
| 3 | rs142803792 | 52558768 | 1 | rs6424546   | 73776673  | 6 | rs76018244  | 72297198 |
| 3 | rs34005367  | 52558904 | 1 | rs17568889  | 73847888  | 6 | rs72925179  | 72298195 |
| 3 | rs11709284  | 52559705 | 1 | rs12120482  | 73849893  | 6 | rs12193019  | 72300534 |
| 3 | rs4475032   | 52560021 | 1 | rs6424689   | 80556027  | 6 | rs9341328   | 72301665 |
| 3 | rs187437419 | 52560073 | 1 | rs11162919  | 80556815  | 6 | rs11756168  | 72303001 |
| 3 | rs192930569 | 52560074 | 1 | rs4483362   | 80624295  | 6 | rs9351832   | 72303339 |
| 3 | rs11711421  | 52561779 | 1 | rs4335329   | 80633312  | 6 | rs1486605   | 72303559 |
| 3 | rs35920544  | 52563199 | 1 | rs6424696   | 80641631  | 6 | rs12193188  | 72303915 |
| 3 | rs35371456  | 52563462 | 1 | rs12568437  | 80681855  | 6 | rs9293845   | 72304241 |
| 3 | rs4687624   | 52563572 | 1 | rs1687845   | 80682411  | 6 | rs9342854   | 72304672 |
| 3 | rs4687625   | 52563718 | 1 | rs1416467   | 80758728  | 6 | rs1486606   | 72305075 |
| 3 | rs6778735   | 52565100 | 1 | rs951258    | 80836881  | 6 | rs1486607   | 72305129 |
| 3 | rs13066644  | 52565247 | 1 | rs1781762   | 80838458  | 6 | rs7775155   | 72305735 |
| 3 | rs13066389  | 52565317 | 1 | rs2997195   | 80838880  | 6 | rs9342855   | 72306160 |
| 3 | rs7614424   | 52566354 | 1 | rs184812    | 80970978  | 6 | rs1156409   | 72306468 |
| 3 | rs7636227   | 52566682 | 1 | rs356287    | 80977963  | 6 | rs9360468   | 72306718 |
| 3 | rs12489732  | 52566820 | 1 | rs7520257   | 90600817  | 6 | rs72938847  | 72307811 |
| 3 | rs7614981   | 52566914 | 1 | rs4269759   | 90601373  | 6 | rs67041987  | 72308014 |
| 3 | rs12489828  | 52567014 | 1 | rs6428576   | 90607718  | 6 | rs139792318 | 72308871 |
| 3 | rs28661185  | 52567188 | 1 | rs7526266   | 90625368  | 6 | rs56680683  | 72309435 |
| 3 | rs4687626   | 52569098 | 1 | rs17463487  | 90625731  | 6 | rs9358965   | 72312071 |
| 3 | rs60611300  | 52569949 | 1 | rs10922788  | 90640333  | 6 | rs9360472   | 72313523 |
| 3 | rs76685449  | 52570330 | 1 | rs6428581   | 90656996  | 6 | rs9442685   | 72313929 |
| 3 | rs7638808   | 52572056 | 1 | rs4415546   | 90658051  | 6 | rs9341329   | 72314189 |
| 3 | rs6445528   | 52572447 | 1 | rs12410130  | 90686440  | 6 | rs6908161   | 72315834 |
| 3 | rs150774614 | 52572844 | 1 | rs6428583   | 90693880  | 6 | rs12663567  | 72316008 |
| 3 | rs60823713  | 52573101 | 1 | rs12117300  | 90740316  | 6 | rs4707928   | 72316230 |
| 3 | rs74620519  | 52573350 | 1 | rs12743329  | 90757360  | 6 | rs9342857   | 72316549 |
| 3 | rs1133415   | 52575831 | 1 | rs12736146  | 90762510  | 6 | rs9351834   | 72317048 |
| 3 | rs7643568   | 52578474 | 1 | rs12747733  | 90766521  | 6 | rs3920742   | 72317266 |
| 3 | rs6802671   | 52579288 | 1 | rs12407088  | 90776860  | 6 | rs75614833  | 72318428 |
| 3 | rs3199918   | 52581435 | 1 | rs12754978  | 90814006  | 6 | rs9293846   | 72319044 |
| 3 | rs2878628   | 52584715 | 1 | rs12734840  | 90944431  | 6 | rs12211666  | 72319079 |
| 3 | rs2251219   | 52584787 | 1 | rs17131081  | 91009841  | 6 | rs75791845  | 72319269 |
| 3 | rs1961958   | 52585990 | 1 | rs3886600   | 197504855 | 6 | rs16881625  | 72319359 |
| 3 | rs60682984  | 52586125 | 1 | rs115834485 | 197505460 | 6 | rs982254    | 72319782 |

|   |             |          |   |             |           |   |             |          |
|---|-------------|----------|---|-------------|-----------|---|-------------|----------|
| 3 | rs78235335  | 52586331 | 1 | rs4026513   | 197505890 | 6 | rs2881952   | 72320145 |
| 3 | rs2336142   | 52588655 | 1 | rs10494757  | 197507411 | 6 | rs6453557   | 72320187 |
| 3 | rs80332599  | 52590568 | 1 | rs4915550   | 197508265 | 6 | rs34273564  | 72321017 |
| 3 | rs6778844   | 52596398 | 1 | rs12094881  | 197508544 | 6 | rs720742    | 72321902 |
| 3 | rs33964154  | 52596914 | 1 | rs4915551   | 197508901 | 6 | rs720741    | 72321961 |
| 3 | rs2289249   | 52597664 | 1 | rs17621768  | 197509624 | 6 | rs9360475   | 72323643 |
| 3 | rs13060048  | 52598608 | 1 | rs12118913  | 197512404 | 6 | rs982564    | 72323850 |
| 3 | rs13063160  | 52602274 | 1 | rs4915552   | 197512778 | 6 | rs982565    | 72323926 |
| 3 | rs6786043   | 52604861 | 1 | rs10754224  | 197512789 | 6 | rs16881643  | 72324280 |
| 3 | rs10510759  | 52607288 | 1 | rs116135944 | 197512851 | 6 | rs1486613   | 72326511 |
| 3 | rs79658570  | 52608529 | 1 | rs79558293  | 197512914 | 6 | rs9342860   | 72327032 |
| 3 | rs74489188  | 52608672 | 1 | rs4303099   | 197515715 | 6 | rs9351837   | 72327545 |
| 3 | rs77716837  | 52609520 | 1 | rs10922249  | 197515981 | 6 | rs10942956  | 72327755 |
| 3 | rs2028220   | 52610513 | 1 | rs12118513  | 197517086 | 6 | rs12197344  | 72327809 |
| 3 | rs34735556  | 52611554 | 1 | rs10801614  | 197520273 | 6 | rs9293847   | 72327933 |
| 3 | rs11718509  | 52614670 | 1 | rs6677361   | 197521877 | 6 | rs6906594   | 72328062 |
| 3 | rs11720243  | 52618018 | 1 | rs6688993   | 197522671 | 6 | rs13195852  | 72328482 |
| 3 | rs75551918  | 52618197 | 1 | rs12028758  | 197522958 | 6 | rs6453558   | 72329609 |
| 3 | rs7614498   | 52618941 | 1 | rs16841715  | 197527261 | 6 | rs829273    | 72329791 |
| 3 | rs12629699  | 52619836 | 1 | rs10922253  | 197527615 | 6 | rs1889276   | 72330088 |
| 3 | rs185116496 | 52621825 | 1 | rs10494758  | 197528149 | 6 | rs1889277   | 72330196 |
| 3 | rs3852066   | 52621839 | 1 | rs6682689   | 197528329 | 6 | rs12212596  | 72330417 |
| 3 | rs2590838   | 52622086 | 1 | rs6691173   | 197528488 | 6 | rs12212719  | 72330453 |
| 3 | rs144941471 | 52622568 | 1 | rs12563879  | 197528805 | 6 | rs829276    | 72331044 |
| 3 | rs35225119  | 52623465 | 1 | rs2111931   | 197529218 | 6 | rs17550741  | 72331861 |
| 3 | rs13065744  | 52623772 | 1 | rs12731480  | 197529264 | 6 | rs272240    | 72333143 |
| 3 | rs77711437  | 52624509 | 1 | rs12125739  | 197529577 | 6 | rs12374601  | 72333794 |
| 3 | rs2336146   | 52626646 | 1 | rs34261593  | 197530702 | 6 | rs272234    | 72335658 |
| 3 | rs2577831   | 52628056 | 1 | rs74461411  | 197531697 | 6 | rs10485019  | 72336534 |
| 3 | rs2118540   | 52629386 | 1 | rs6689216   | 197536225 | 6 | rs10942957  | 72337017 |
| 3 | rs2164884   | 52629633 | 1 | rs4026508   | 197536424 | 6 | rs118081514 | 72337310 |
| 3 | rs12107484  | 52632093 | 1 | rs10922255  | 197537029 | 6 | rs9442688   | 72339566 |
| 3 | rs62253703  | 52632357 | 1 | rs10922256  | 197545307 | 6 | rs10455241  | 72341858 |
| 3 | rs114597651 | 52634050 | 1 | rs10922257  | 197545720 | 6 | rs166621    | 72342533 |
| 3 | rs2276824   | 52637486 | 1 | rs1998711   | 197546093 | 6 | rs9446428   | 72343558 |
| 3 | rs34341044  | 52637631 | 1 | rs2016722   | 197546459 | 6 | rs1575208   | 72346472 |
| 3 | rs3774366   | 52641255 | 1 | rs6428410   | 197546891 | 6 | rs59328205  | 72347297 |
| 3 | rs78410573  | 52641568 | 1 | rs10737692  | 197548933 | 6 | rs272206    | 72348344 |
| 3 | rs71299610  | 52641703 | 1 | rs4915554   | 197549551 | 6 | rs1321831   | 72349268 |
| 3 | rs3774365   | 52642487 | 1 | rs10922259  | 197549777 | 6 | rs13210716  | 72349628 |
| 3 | rs12487591  | 52642936 | 1 | rs193149367 | 197551514 | 6 | rs16881676  | 72349689 |
| 3 | rs3755806   | 52643685 | 1 | rs2884629   | 197552034 | 6 | rs16881677  | 72350814 |
| 3 | rs6803492   | 52649090 | 1 | rs113633618 | 197552813 | 6 | rs9351839   | 72351169 |
| 3 | rs13083798  | 52649748 | 1 | rs2193733   | 197554134 | 6 | rs717519    | 72351393 |
| 3 | rs10510760  | 52650348 | 1 | rs78636848  | 197554302 | 6 | rs35525158  | 72352061 |
| 3 | rs77810318  | 52650919 | 1 | rs72742683  | 197554943 | 6 | rs6912835   | 72352079 |
| 3 | rs62253734  | 52653645 | 1 | rs10922260  | 197555404 | 6 | rs112249916 | 72355142 |
| 3 | rs60256157  | 52656491 | 1 | rs16841765  | 197555761 | 6 | rs272212    | 72355435 |



|   |              |          |   |             |           |   |             |          |
|---|--------------|----------|---|-------------|-----------|---|-------------|----------|
| 3 | rs75246353   | 52656781 | 1 | rs11583319  | 197555860 | 6 | rs80112601  | 72356119 |
| 3 | rs13064064   | 52657002 | 1 | rs10922261  | 197557272 | 6 | rs9442689   | 72356347 |
| 3 | rs61538294   | 52659594 | 1 | rs2193734   | 197557552 | 6 | rs272211    | 72356738 |
| 3 | rs1561337    | 52659963 | 1 | rs75007359  | 197559290 | 6 | rs9446432   | 72356760 |
| 3 | rs79457385   | 52660127 | 1 | rs6702421   | 197559324 | 6 | rs12194008  | 72359600 |
| 3 | rs184514749  | 52661018 | 1 | rs10922263  | 197559836 | 6 | rs72940808  | 72361341 |
| 3 | rs7622694    | 52663882 | 1 | rs78259147  | 197560252 | 6 | rs13190763  | 72362565 |
| 3 | rs78506463   | 52664168 | 1 | rs17622452  | 197560485 | 6 | rs9351841   | 72363324 |
| 3 | rs78842975   | 52667856 | 1 | rs2111934   | 197560962 | 6 | rs117855045 | 72363381 |
| 3 | rs2083180    | 52668119 | 1 | rs8179369   | 197561407 | 6 | rs7743293   | 72363620 |
| 3 | rs17052357   | 52668638 | 1 | rs35939830  | 197561510 | 6 | rs80149900  | 72364273 |
| 3 | rs13068293   | 52672167 | 1 | rs12141028  | 197562511 | 6 | rs272213    | 72365557 |
| 3 | rs11130312   | 52675055 | 1 | rs6667685   | 197563333 | 6 | rs16881689  | 72366341 |
| 3 | rs11130313   | 52676190 | 1 | rs4274099   | 197563701 | 6 | rs9342864   | 72366851 |
| 3 | rs13099479   | 52677478 | 1 | rs12747786  | 197565832 | 6 | rs9293848   | 72367279 |
| 3 | rs13085895   | 52678270 | 1 | rs10922264  | 197566414 | 6 | rs76029558  | 72369567 |
| 3 | rs2028216    | 52680823 | 1 | rs16841794  | 197568270 | 6 | rs9442690   | 72369851 |
| 3 | rs2289250    | 52682946 | 1 | rs6428411   | 197569657 | 6 | rs117502260 | 72371452 |
| 3 | rs33967311   | 52683864 | 1 | rs6428412   | 197570018 | 6 | rs2200526   | 72372492 |
| 3 | rs934839     | 52683898 | 1 | rs114138649 | 197570517 | 6 | rs2200527   | 72372493 |
| 3 | rs80214269   | 52688746 | 1 | rs12144001  | 197570844 | 6 | rs189590254 | 72373070 |
| 3 | rs12486847   | 52691112 | 1 | rs7544969   | 197571246 | 6 | rs11755205  | 72373830 |
| 3 | rs2590846    | 52692359 | 1 | rs1833464   | 197571577 | 6 | rs272226    | 72375097 |
| 3 | rs56665533   | 52692725 | 1 | rs7531581   | 197571885 | 6 | rs1547046   | 72375154 |
| 3 | rs78059582   | 52693216 | 1 | rs12142712  | 197572672 | 6 | rs2200528   | 72375836 |
| 3 | rs6804145    | 52694198 | 1 | rs115942017 | 197573021 | 6 | rs9341336   | 72376785 |
| 3 | rs11715796   | 52695650 | 1 | rs17564924  | 197574134 | 6 | rs9350422   | 72376933 |
| 3 | rs7651709    | 52695861 | 1 | rs972405    | 197574174 | 6 | rs75519891  | 72377018 |
| 3 | rs72950432   | 52696352 | 1 | rs116759938 | 197574231 | 6 | rs12173946  | 72377779 |
| 3 | rs11130314   | 52697082 | 1 | rs116567755 | 197577447 | 6 | rs9351843   | 72378029 |
| 3 | rs79993196   | 52697566 | 1 | rs7548454   | 197578795 | 6 | rs272229    | 72378469 |
| 3 | rs71299613   | 52698805 | 1 | rs79627522  | 197578878 | 6 | rs74787814  | 72378588 |
| 3 | rs1992193    | 52699089 | 1 | rs112883537 | 197579127 | 6 | rs10942960  | 72379124 |
| 3 | rs2577842    | 52700984 | 1 | rs1362939   | 197580084 | 6 | rs9442691   | 72379528 |
| 3 | rs73078833   | 52703691 | 1 | rs12116508  | 197580452 | 6 | rs77081319  | 72381439 |
| 3 | rs12496476   | 52708737 | 1 | rs10922266  | 197582447 | 6 | rs73525252  | 72381632 |
| 3 | rs73078835   | 52709711 | 1 | rs4915557   | 197582601 | 6 | rs2840983   | 72382345 |
| 3 | rs114180403  | 52709810 | 1 | rs11799915  | 197582780 | 6 | rs74541915  | 72382501 |
| 3 | rs180905584  | 52709850 | 1 | rs4915558   | 197582809 | 6 | rs10223675  | 72382998 |
| 3 | rs62255368   | 52710172 | 1 | rs1969      | 197583281 | 6 | rs10455242  | 72383139 |
| 3 | rs72950437   | 52714400 | 1 | rs3814321   | 197583843 | 6 | rs78139980  | 72384426 |
| 3 | rs78892252   | 52715311 | 1 | rs12744898  | 197584553 | 6 | rs117534741 | 72384541 |
| 3 | rs3733039    | 52719088 | 1 | rs34780947  | 197585077 | 6 | rs6918162   | 72384595 |
| 3 | rs1108842    | 52720080 | 1 | rs2111930   | 197586232 | 6 | rs4706488   | 72385311 |
| 3 | rs11177      | 52721305 | 1 | rs12022672  | 197588006 | 6 | rs9442693   | 72386001 |
| 3 | rs35911561   | 52722562 | 1 | rs76017973  | 197589075 | 6 | rs272244    | 72386156 |
| 3 | rs1315803266 | 52723309 | 1 | rs4282851   | 197590190 | 6 | rs2054810   | 72386408 |
| 3 | rs6762813    | 52726695 | 1 | rs10801620  | 197591406 | 6 | rs79775242  | 72386598 |

|   |             |          |   |             |           |   |             |          |
|---|-------------|----------|---|-------------|-----------|---|-------------|----------|
| 3 | rs2289247   | 52727257 | 1 | rs114114064 | 197591828 | 6 | rs62407661  | 72386761 |
| 3 | rs4532127   | 52727736 | 1 | rs12133885  | 197592568 | 6 | rs10455243  | 72389035 |
| 3 | rs6976      | 52728804 | 1 | rs61829341  | 197599552 | 6 | rs9442694   | 72391018 |
| 3 | rs56156188  | 52730699 | 1 | rs12127378  | 197601092 | 6 | rs16881710  | 72391525 |
| 3 | rs139683420 | 52730946 | 1 | rs12041661  | 197601668 | 6 | rs175360    | 72392227 |
| 3 | rs2164885   | 52731269 | 1 | rs17565558  | 197604346 | 6 | rs1552418   | 72392503 |
| 3 | rs11130317  | 52731483 | 1 | rs10442656  | 197606708 | 6 | rs74956132  | 72392699 |
| 3 | rs13081155  | 52732429 | 1 | rs114282645 | 197607459 | 6 | rs79385039  | 72392941 |
| 3 | rs3075809   | 52733082 | 1 | rs6682968   | 197608612 | 6 | rs9442695   | 72395398 |
| 3 | rs6765687   | 52733106 | 1 | rs16841842  | 197611682 | 6 | rs1321834   | 72397798 |
| 3 | rs8906      | 52739520 | 1 | rs11331300  | 197612110 | 6 | rs1358853   | 72398900 |
| 3 | rs6617      | 52740182 | 1 | rs10922269  | 197612247 | 6 | rs6453563   | 72400667 |
| 3 | rs79633493  | 52741032 | 1 | rs2477070   | 197612759 | 6 | rs9342867   | 72401653 |
| 3 | rs3755798   | 52741160 | 1 | rs1747826   | 197612994 | 6 | rs2754043   | 72401810 |
| 3 | rs34017441  | 52742413 | 1 | rs6688289   | 197615058 | 6 | rs78227980  | 72402864 |
| 3 | rs115738369 | 52743289 | 1 | rs1775448   | 197615130 | 6 | rs2754044   | 72403927 |
| 3 | rs34182518  | 52743854 | 1 | rs114848122 | 197615193 | 6 | rs6908543   | 72404002 |
| 3 | rs13079063  | 52744460 | 1 | rs1747827   | 197615391 | 6 | rs11754467  | 72404171 |
| 3 | rs11235     | 52745087 | 1 | rs34496840  | 197615669 | 6 | rs6909301   | 72404212 |
| 3 | rs145014080 | 52747486 | 1 | rs10494761  | 197617436 | 6 | rs55730421  | 72404585 |
| 3 | rs2878726   | 52748271 | 1 | rs115195008 | 197618445 | 6 | rs2840980   | 72404963 |
| 3 | rs11716747  | 52748857 | 1 | rs2488390   | 197619068 | 6 | rs78464929  | 72405000 |
| 3 | rs35526119  | 52749334 | 1 | rs16841851  | 197621237 | 6 | rs1321835   | 72405583 |
| 3 | rs60770874  | 52750199 | 1 | rs2477073   | 197622528 | 6 | rs35506119  | 72406224 |
| 3 | rs116493126 | 52750325 | 1 | rs12746503  | 197625313 | 6 | rs4707930   | 72406319 |
| 3 | rs7624716   | 52751534 | 1 | rs2253257   | 197626708 | 6 | rs57810898  | 72408659 |
| 3 | rs115745575 | 52753308 | 1 | rs2477074   | 197626823 | 6 | rs4415130   | 72408820 |
| 3 | rs56196917  | 52756045 | 1 | rs1775453   | 197629342 | 6 | rs10942965  | 72409662 |
| 3 | rs72960240  | 52759133 | 1 | rs2488389   | 197631141 | 6 | rs66666960  | 72412463 |
| 3 | rs13063138  | 52759254 | 1 | rs79599941  | 197631657 | 6 | rs2754047   | 72413070 |
| 3 | rs13087538  | 52763453 | 1 | rs1775470   | 197632910 | 6 | rs79864653  | 72413517 |
| 3 | rs6769720   | 52764350 | 1 | rs1775451   | 197635605 | 6 | rs12526311  | 72413544 |
| 3 | rs10780035  | 52764624 | 1 | rs12117045  | 197638716 | 6 | rs2754049   | 72414808 |
| 3 | rs73078847  | 52764787 | 1 | rs2488409   | 197644581 | 6 | rs2145546   | 72415931 |
| 3 | rs2268027   | 52766606 | 1 | rs9633354   | 197644773 | 6 | rs9360484   | 72415949 |
| 3 | rs767418    | 52767427 | 1 | rs36077246  | 197645403 | 6 | rs2754050   | 72416458 |
| 3 | rs1231194   | 52769047 | 1 | rs2224873   | 197645449 | 6 | rs12528636  | 72418076 |
| 3 | rs11130323  | 52770277 | 1 | rs12751508  | 197646544 | 6 | rs73527251  | 72418122 |
| 3 | rs56276589  | 52772198 | 1 | rs10801621  | 197649941 | 6 | rs2754051   | 72418574 |
| 3 | rs34184137  | 52774017 | 1 | rs2488410   | 197650505 | 6 | rs71558905  | 72419055 |
| 3 | rs75321479  | 52778210 | 1 | rs1775450   | 197652602 | 6 | rs9446449   | 72420588 |
| 3 | rs2268026   | 52778347 | 1 | rs1747811   | 197653036 | 6 | rs927276    | 72421550 |
| 3 | rs60058353  | 52778409 | 1 | rs78823478  | 197653854 | 6 | rs75887902  | 72422228 |
| 3 | rs2072390   | 52780509 | 1 | rs2488411   | 197658799 | 6 | rs149667650 | 72422422 |
| 3 | rs6762788   | 52792311 | 1 | rs6691216   | 197659263 | 6 | rs911364    | 72422458 |
| 3 | rs1029871   | 52797634 | 1 | rs1891497   | 197659555 | 6 | rs1204325   | 72422694 |
| 3 | rs72960281  | 52802871 | 1 | rs2477076   | 197660143 | 6 | rs1204326   | 72422775 |
| 3 | rs13071584  | 52804487 | 1 | rs78290672  | 197661907 | 6 | rs911363    | 72423098 |

|   |             |          |   |             |           |   |             |           |
|---|-------------|----------|---|-------------|-----------|---|-------------|-----------|
| 3 | rs998909    | 52805093 | 1 | rs151183648 | 197662801 | 6 | rs12055765  | 72423935  |
| 3 | rs11717836  | 52807736 | 1 | rs115075685 | 197663354 | 6 | rs66707419  | 72425163  |
| 3 | rs72960285  | 52807816 | 1 | rs2358774   | 197664395 | 6 | rs1204328   | 72427371  |
| 3 | rs1014969   | 52808341 | 1 | rs114979698 | 197665307 | 6 | rs1547683   | 72428824  |
| 3 | rs3755799   | 52809193 | 1 | rs12131588  | 197666111 | 6 | rs1547684   | 72428869  |
| 3 | rs2019065   | 52809525 | 1 | rs2477077   | 197671115 | 6 | rs80232328  | 72430245  |
| 3 | rs62255400  | 52812231 | 1 | rs16841894  | 197671853 | 6 | rs829463    | 72430502  |
| 3 | rs75097760  | 52814643 | 1 | rs114780135 | 197674188 | 6 | rs9358971   | 72430922  |
| 3 | rs36012032  | 52814709 | 1 | rs12354257  | 197674344 | 6 | rs829464    | 72430997  |
| 3 | rs2710323   | 52815905 | 1 | rs80088735  | 197675371 | 6 | rs829465    | 72431453  |
| 3 | rs187624109 | 52816588 | 1 | rs1573099   | 197683590 | 6 | rs75470097  | 72431884  |
| 3 | rs2710322   | 52817593 | 1 | rs61829344  | 197683734 | 6 | rs829466    | 72431919  |
| 3 | rs3774354   | 52817675 | 1 | rs1573098   | 197683807 | 6 | rs60502272  | 72435788  |
| 3 | rs3774355   | 52817778 | 1 | rs1621898   | 197684499 | 6 | rs9442699   | 72436075  |
| 3 | rs11715487  | 52818301 | 1 | rs1775457   | 197685151 | 6 | rs116852172 | 72436273  |
| 3 | rs2239551   | 52818579 | 1 | rs28709435  | 197685827 | 6 | rs9293851   | 72437006  |
| 3 | rs2268023   | 52819327 | 1 | rs115549264 | 197687255 | 6 | rs829470    | 72437128  |
| 3 | rs2535630   | 52819883 | 1 | rs2488386   | 197688956 | 6 | rs829472    | 72437718  |
| 3 | rs678       | 52820981 | 1 | rs12092948  | 197689967 | 6 | rs62407672  | 72439008  |
| 3 | rs1042779   | 52821011 | 1 | rs115193323 | 197692691 | 6 | rs11965010  | 72440089  |
| 3 | rs2286798   | 52821177 | 1 | rs2147300   | 197693127 | 6 | rs9342868   | 72440800  |
| 3 | rs111477914 | 52821666 | 1 | rs12031377  | 197693266 | 6 | rs829473    | 72440951  |
| 3 | rs68094128  | 52821993 | 1 | rs1573100   | 197693782 | 6 | rs1328704   | 72453473  |
| 3 | rs2239550   | 52822509 | 1 | rs2488387   | 197694037 | 6 | rs6915754   | 72456632  |
| 3 | rs2300149   | 52822921 | 1 | rs115893483 | 197695451 | 6 | rs10942983  | 72548959  |
| 3 | rs2239549   | 52823126 | 1 | rs116252612 | 197697093 | 6 | rs7771873   | 72562041  |
| 3 | rs4687550   | 52823430 | 1 | rs10754228  | 197697626 | 6 | rs1147521   | 72586024  |
| 3 | rs4687551   | 52823448 | 1 | rs1747815   | 197698103 | 6 | rs2040055   | 72603664  |
| 3 | rs2270197   | 52824095 | 1 | rs1747814   | 197699699 | 6 | rs1111356   | 72647508  |
| 3 | rs1076425   | 52825462 | 1 | rs2488397   | 197701279 | 6 | rs9358986   | 72649870  |
| 3 | rs1075653   | 52825528 | 1 | rs2488398   | 197701376 | 6 | rs519470    | 72727772  |
| 3 | rs9324      | 52825585 | 1 | rs6428416   | 197701669 | 6 | rs557365    | 72729528  |
| 3 | rs7549      | 52825912 | 1 | rs16841904  | 197701992 | 6 | rs17757107  | 98472940  |
| 3 | rs2071506   | 52826276 | 1 | rs2488400   | 197702225 | 6 | rs4839936   | 98489654  |
| 3 | rs7466694   | 52826620 | 1 | rs2488401   | 197702401 | 6 | rs13194250  | 98494218  |
| 3 | rs2071507   | 52826707 | 1 | rs16841912  | 197702476 | 6 | rs901630    | 98539519  |
| 3 | rs2071508   | 52826846 | 1 | rs17641481  | 197703895 | 6 | rs11964122  | 98546394  |
| 3 | rs4687654   | 52827566 | 1 | rs17641524  | 197704717 | 6 | rs9375195   | 98562720  |
| 3 | rs2239699   | 52827915 | 1 | rs1747818   | 197708342 | 6 | rs4144176   | 98699052  |
| 3 | rs9881468   | 52828628 | 1 | rs74541273  | 197708877 | 6 | rs6932108   | 98713992  |
| 3 | rs56009954  | 52829607 | 1 | rs76312929  | 197709961 | 6 | rs12205572  | 166779464 |
| 3 | rs2240921   | 52830764 | 1 | rs12066841  | 197710246 | 6 | rs11557064  | 166780349 |
| 3 | rs2240920   | 52831009 | 1 | rs1747817   | 197711492 | 6 | rs1546854   | 166796433 |
| 3 | rs62255413  | 52831386 | 1 | rs79279254  | 197717327 | 6 | rs9348131   | 166850798 |
| 3 | rs2240919   | 52831701 | 1 | rs115710466 | 197719607 | 6 | rs2281053   | 166860996 |
| 3 | rs2535629   | 52833219 | 1 | rs2488393   | 197722240 | 6 | rs6932660   | 166862431 |
| 3 | rs3617      | 52833805 | 1 | rs75581554  | 197724011 | 6 | rs9355581   | 166865273 |
| 3 | rs9848554   | 52836337 | 1 | rs10922273  | 197725373 | 6 | rs4710051   | 166865675 |

|   |            |           |   |             |           |   |            |           |
|---|------------|-----------|---|-------------|-----------|---|------------|-----------|
| 3 | rs17331151 | 52844534  | 1 | rs1775454   | 197727298 | 6 | rs12208871 | 166873823 |
| 3 | rs4687657  | 52852538  | 1 | rs114356669 | 197727327 | 6 | rs3817792  | 166876628 |
| 3 | rs2239547  | 52855229  | 1 | rs77590973  | 197727599 | 6 | rs6905447  | 166878799 |
| 3 | rs2276816  | 52860816  | 1 | rs1998598   | 197727642 | 6 | rs9348138  | 166882847 |
| 3 | rs2276817  | 52860936  | 1 | rs61829349  | 197729197 | 6 | rs9459678  | 166883981 |
| 3 | rs4687554  | 52864135  | 1 | rs114849732 | 197730112 | 6 | rs6926393  | 166884211 |
| 3 | rs13083728 | 52868445  | 1 | rs17641842  | 197730559 | 6 | rs743977   | 166936612 |
| 3 | rs1573815  | 52870132  | 1 | rs17567921  | 197730729 | 6 | rs11755127 | 166952981 |
| 3 | rs1139106  | 52871101  | 1 | rs1775456   | 197733055 | 6 | rs3799619  | 166976374 |
| 3 | rs3733047  | 52871929  | 1 | rs1342696   | 197733453 | 6 | rs4710072  | 166998662 |
| 3 | rs6445539  | 52874296  | 1 | rs1539413   | 197733942 | 6 | rs12528284 | 167013993 |
| 3 | rs11720228 | 52877270  | 1 | rs115602286 | 197734118 | 6 | rs3799570  | 167030620 |
| 3 | rs13080929 | 52885112  | 1 | rs7516481   | 197734899 | 6 | rs4145432  | 167043542 |
| 3 | rs13059603 | 63827381  | 1 | rs2488394   | 197735497 | 6 | rs9356500  | 167056898 |
| 3 | rs17069612 | 63977676  | 1 | rs6661330   | 197735597 | 6 | rs12213805 | 167107649 |
| 3 | rs9848926  | 135816302 | 1 | rs1924517   | 197738325 | 6 | rs7770200  | 167151463 |
| 3 | rs10512987 | 135823077 | 1 | rs1924518   | 197738327 | 6 | rs9295368  | 167166933 |
| 3 | rs10935177 | 135851077 | 1 | rs2488395   | 197738780 | 6 | rs661325   | 167181032 |
| 3 | rs1393786  | 135854035 | 1 | rs1775444   | 197740690 | 6 | rs2178806  | 167218762 |
| 3 | rs17198295 | 135856318 | 1 | rs4915561   | 197740938 | 6 | rs6902718  | 167232907 |
| 3 | rs6786582  | 135898984 | 1 | rs2488396   | 197742171 | 7 | rs2189634  | 11626988  |
| 3 | rs645040   | 135926622 | 1 | rs6685897   | 197742948 | 7 | rs2526105  | 11657211  |
| 3 | rs687339   | 135932359 | 1 | rs78424313  | 197743274 | 7 | rs10499416 | 11735354  |
| 3 | rs9844666  | 135974216 | 1 | rs1539414   | 197743506 | 7 | rs2883585  | 11740020  |
| 3 | rs1153877  | 136004925 | 1 | rs12135210  | 197745243 | 7 | rs9785045  | 11742920  |
| 3 | rs1279840  | 136006576 | 1 | rs1775447   | 197746486 | 7 | rs12671899 | 11779082  |
| 3 | rs9848883  | 136008432 | 1 | rs12081207  | 197746565 | 7 | rs10499405 | 11791774  |
| 3 | rs556788   | 136027549 | 1 | rs1747812   | 197746925 | 7 | rs1526518  | 11809623  |
| 3 | rs9853387  | 136038988 | 1 | rs1775446   | 197746995 | 7 | rs4721012  | 11825210  |
| 3 | rs667920   | 136069472 | 1 | rs6675292   | 197747067 | 7 | rs6947930  | 11855636  |
| 3 | rs9860801  | 136088038 | 1 | rs1342694   | 197749868 | 7 | rs2355102  | 11857720  |
| 3 | rs9880211  | 136107549 | 1 | rs1775469   | 197753074 | 7 | rs1961842  | 11932891  |
| 3 | rs6768743  | 136205007 | 1 | rs1747825   | 197753136 | 7 | rs17165338 | 11938060  |
| 3 | rs9858105  | 136219264 | 1 | rs1775468   | 197754064 | 7 | rs4275121  | 11955266  |
| 3 | rs9880099  | 136255776 | 1 | rs1775467   | 197754947 | 7 | rs6963121  | 11959035  |
| 3 | rs7621025  | 136272246 | 1 | rs1775466   | 197754967 | 7 | rs10224784 | 11964376  |
| 3 | rs12635723 | 136300732 | 1 | rs1747823   | 197755646 | 7 | rs10254316 | 11964570  |
| 3 | rs12630999 | 136300927 | 1 | rs76250973  | 197756099 | 7 | rs10228842 | 11965352  |
| 3 | rs13071220 | 136314119 | 1 | rs1747822   | 197756223 | 7 | rs17577569 | 12007154  |
| 3 | rs9820513  | 136346292 | 1 | rs1747821   | 197756433 | 7 | rs6959385  | 12031826  |
| 3 | rs4038586  | 136363291 | 1 | rs1747820   | 197756464 | 7 | rs2192735  | 12033933  |
| 3 | rs6789152  | 136401351 | 1 | rs2497863   | 197756577 | 7 | rs10280298 | 12049985  |
| 3 | rs13072691 | 136425600 | 1 | rs1627999   | 197757072 | 7 | rs11982169 | 12051898  |
| 3 | rs13075615 | 136505832 | 1 | rs111899896 | 197757144 | 7 | rs2966619  | 12052059  |
| 3 | rs6439664  | 136537074 | 1 | rs1622740   | 197757736 | 7 | rs17165507 | 12053458  |
| 3 | rs1052620  | 136574521 | 1 | rs3900909   | 197757846 | 7 | rs11977758 | 12065305  |
| 3 | rs13086336 | 180620256 | 1 | rs1747828   | 197758154 | 7 | rs2908738  | 12065405  |
| 3 | rs1805579  | 180630565 | 1 | rs1775462   | 197758223 | 7 | rs17581371 | 12090560  |

|   |             |           |   |             |           |    |            |           |
|---|-------------|-----------|---|-------------|-----------|----|------------|-----------|
| 3 | rs1805584   | 180632030 | 1 | rs1775461   | 197758388 | 7  | rs17581713 | 12105982  |
| 3 | rs1805564   | 180633485 | 1 | rs1775460   | 197758439 | 7  | rs4721023  | 12112471  |
| 3 | rs1805567   | 180639252 | 1 | rs1775459   | 197758569 | 7  | rs10257135 | 104893565 |
| 3 | rs1805571   | 180646631 | 1 | rs1775458   | 197758574 | 7  | rs2079341  | 104904235 |
| 3 | rs1805572   | 180647263 | 1 | rs2649557   | 197758895 | 7  | rs12155351 | 104943302 |
| 3 | rs1805589   | 180647410 | 1 | rs2488402   | 197759335 | 7  | rs4730087  | 105090115 |
| 3 | rs1805604   | 180673936 | 1 | rs77849192  | 197766026 | 7  | rs4493843  | 105094283 |
| 3 | rs2601      | 180700150 | 1 | rs1578719   | 197766564 | 7  | rs13437626 | 105096661 |
| 3 | rs9810292   | 180714307 | 1 | rs116788502 | 197766632 | 7  | rs61741425 | 105148593 |
| 3 | rs10470517  | 180726056 | 1 | rs71633808  | 197767035 | 7  | rs10271614 | 105208492 |
| 3 | rs10049181  | 180736253 | 1 | rs12749423  | 197767682 | 7  | rs17280048 | 105277366 |
| 3 | rs12635178  | 180797921 | 1 | rs34451672  | 197767842 | 7  | rs17345800 | 105277793 |
| 3 | rs13072358  | 180873415 | 1 | rs55873039  | 197767978 | 7  | rs17280230 | 105288867 |
| 3 | rs1878874   | 181035370 | 1 | rs12564235  | 197768095 | 7  | rs562221   | 105291444 |
| 3 | rs6782970   | 181101544 | 1 | rs12733235  | 197768282 | 7  | rs10487888 | 140499107 |
| 3 | rs4854914   | 181122223 | 1 | rs1499593   | 197768507 | 7  | rs9640168  | 140532269 |
| 3 | rs4855026   | 181126962 | 1 | rs12740849  | 197769821 | 7  | rs9648716  | 140612163 |
| 3 | rs1871355   | 181146051 | 1 | rs6658157   | 197775931 | 7  | rs11762469 | 140614212 |
| 3 | rs9839993   | 181153038 | 1 | rs4915564   | 197777147 | 7  | rs4726135  | 140668619 |
| 3 | rs1351235   | 181166485 | 1 | rs12125742  | 197780744 | 7  | rs38723    | 140695812 |
| 3 | rs4855028   | 181168159 | 1 | rs112562413 | 197780795 | 7  | rs11764061 | 140754785 |
| 3 | rs7373337   | 181183727 | 1 | rs12123169  | 197780966 | 7  | rs722219   | 140788213 |
| 3 | rs13061117  | 181186466 | 1 | rs12134279  | 197781198 | 7  | rs11762357 | 140801429 |
| 3 | rs7611361   | 181195182 | 1 | rs116332466 | 197782332 | 7  | rs1860752  | 140804805 |
| 3 | rs1479176   | 181201428 | 1 | rs4915566   | 197782736 | 7  | rs2018320  | 140810892 |
| 4 | rs364553    | 103149704 | 1 | rs7538522   | 197782984 | 7  | rs10246772 | 140914741 |
| 4 | rs62322251  | 103149809 | 1 | rs7526770   | 197783075 | 10 | rs10761461 | 61883364  |
| 4 | rs55980430  | 103151238 | 1 | rs4915567   | 197784249 | 10 | rs12761450 | 61885892  |
| 4 | rs17032185  | 103151453 | 1 | rs2358488   | 197784342 | 10 | rs12355908 | 61937004  |
| 4 | rs463661    | 103151556 | 1 | rs12121863  | 197785420 | 10 | rs16914591 | 61946060  |
| 4 | rs460610    | 103154130 | 1 | rs6428417   | 197787719 | 10 | rs4245586  | 61950427  |
| 4 | rs406749    | 103154313 | 1 | rs12125942  | 197788562 | 10 | rs74156431 | 61952950  |
| 4 | rs456734    | 103154686 | 1 | rs10922294  | 197790943 | 10 | rs74156432 | 61953034  |
| 4 | rs35166705  | 103156923 | 1 | rs16841984  | 197793482 | 10 | rs73263129 | 61954035  |
| 4 | rs55866413  | 103156971 | 1 | rs6704186   | 197793687 | 10 | rs4310561  | 61954476  |
| 4 | rs113361187 | 103160829 | 1 | rs75622950  | 197793998 | 10 | rs10994248 | 61954581  |
| 4 | rs10433893  | 103160885 | 1 | rs6667560   | 197794699 | 10 | rs10509127 | 61954702  |
| 4 | rs60245306  | 103163926 | 1 | rs4915569   | 197795018 | 10 | rs4948256  | 61956912  |
| 4 | rs458779    | 103163959 | 1 | rs35162839  | 197806129 | 10 | rs6479698  | 61956999  |
| 4 | rs459331    | 103167316 | 1 | rs1010128   | 197806474 | 10 | rs10821699 | 61957168  |
| 4 | rs56385550  | 103167394 | 1 | rs17642632  | 197808778 | 10 | rs3897459  | 61957641  |
| 4 | rs49178     | 103167613 | 1 | rs10737695  | 197810094 | 10 | rs78173462 | 61958545  |
| 4 | rs457490    | 103168050 | 1 | rs12118454  | 197810649 | 10 | rs12266845 | 61958620  |
| 4 | rs76407418  | 103168210 | 1 | rs904576    | 197810847 | 10 | rs16914616 | 61958983  |
| 4 | rs181765414 | 103168356 | 1 | rs6678151   | 197811282 | 10 | rs10821700 | 61959061  |
| 4 | rs11736058  | 103168673 | 1 | rs10922298  | 197811566 | 10 | rs16914619 | 61960135  |
| 4 | rs28718345  | 103169827 | 1 | rs10922299  | 197812165 | 10 | rs77392577 | 61960201  |
| 4 | rs657521    | 103170824 | 1 | rs12120352  | 197812259 | 10 | rs7081073  | 61960705  |

|   |             |           |   |             |           |    |             |          |
|---|-------------|-----------|---|-------------|-----------|----|-------------|----------|
| 4 | rs75671166  | 103172184 | 1 | rs6692930   | 197812669 | 10 | rs10821701  | 61961162 |
| 4 | rs465144    | 103172201 | 1 | rs2221134   | 197812732 | 10 | rs10994250  | 61961795 |
| 4 | rs62327889  | 103172826 | 1 | rs12408939  | 197812823 | 10 | rs78025156  | 61962177 |
| 4 | rs460026    | 103173058 | 1 | rs2201956   | 197812879 | 10 | rs7078609   | 61963063 |
| 4 | rs463373    | 103173173 | 1 | rs12026183  | 197813032 | 10 | rs2393623   | 61963427 |
| 4 | rs444943    | 103173564 | 1 | rs12141007  | 197813558 | 10 | rs6479700   | 61963759 |
| 4 | rs13126885  | 103173749 | 1 | rs12740041  | 197814607 | 10 | rs10821702  | 61964409 |
| 4 | rs72924805  | 103173900 | 1 | rs34478776  | 197814623 | 10 | rs7923097   | 61964546 |
| 4 | rs190178    | 103174015 | 1 | rs10922300  | 197814685 | 10 | rs10994253  | 61964752 |
| 4 | rs151370    | 103174491 | 1 | rs10801625  | 197814759 | 10 | rs7895510   | 61964948 |
| 4 | rs17032286  | 103174653 | 1 | rs12403425  | 197814823 | 10 | rs10740014  | 61965009 |
| 4 | rs192068    | 103174819 | 1 | rs10922301  | 197815016 | 10 | rs10733760  | 61965078 |
| 4 | rs149268    | 103175292 | 1 | rs10922302  | 197815091 | 10 | rs10732408  | 61965188 |
| 4 | rs62327912  | 103176039 | 1 | rs6428419   | 197815963 | 10 | rs12358993  | 61965215 |
| 4 | rs17823175  | 103176308 | 1 | rs10922303  | 197816696 | 10 | rs12411380  | 61965316 |
| 4 | rs58379650  | 103176740 | 1 | rs114156678 | 197816763 | 10 | rs2297979   | 61965625 |
| 4 | rs2298752   | 103177071 | 1 | rs12043482  | 197817740 | 10 | rs17805636  | 61966368 |
| 4 | rs17032321  | 103177480 | 1 | rs1004479   | 197817880 | 10 | rs4948257   | 61966441 |
| 4 | rs115980427 | 103179168 | 1 | rs1553172   | 197818233 | 10 | rs117118083 | 61966630 |
| 4 | rs4476601   | 103179173 | 1 | rs10922304  | 197820945 | 10 | rs4948398   | 61966755 |
| 4 | rs170871    | 103180149 | 1 | rs1039288   | 197821607 | 10 | rs10761465  | 61969227 |
| 4 | rs189215    | 103180875 | 1 | rs10922305  | 197821769 | 10 | rs10740015  | 61969445 |
| 4 | rs17032357  | 103182616 | 1 | rs1039287   | 197821871 | 10 | rs1954134   | 61969598 |
| 4 | rs4698843   | 103182636 | 1 | rs12145078  | 197822977 | 10 | rs10761466  | 61969768 |
| 4 | rs17032332  | 103182661 | 1 | rs12145083  | 197822994 | 10 | rs75489412  | 61970546 |
| 4 | rs151390    | 103183510 | 1 | rs6688420   | 197823052 | 10 | rs7074185   | 61971486 |
| 4 | rs9705      | 103183531 | 1 | rs10801626  | 197823154 | 10 | rs75918166  | 61971911 |
| 4 | rs151392    | 103183935 | 1 | rs10922306  | 197823360 | 10 | rs7903287   | 61972114 |
| 4 | rs151393    | 103184089 | 1 | rs4915250   | 197826253 | 10 | rs75831230  | 61972855 |
| 4 | rs56072709  | 103186222 | 1 | rs6704237   | 197826258 | 10 | rs11819367  | 61973497 |
| 4 | rs151395    | 103186708 | 1 | rs4915251   | 197826672 | 10 | rs10821703  | 61973814 |
| 4 | rs151396    | 103186782 | 1 | rs4915572   | 197826746 | 10 | rs1417381   | 61981219 |
| 4 | rs62327916  | 103187146 | 1 | rs115545114 | 197827855 | 10 | rs117337450 | 61981287 |
| 4 | rs56215225  | 103187430 | 1 | rs116582102 | 197828609 | 10 | rs10994257  | 61982048 |
| 4 | rs151399    | 103187562 | 1 | rs10922307  | 197829619 | 10 | rs74922600  | 61982657 |
| 4 | rs151400    | 103187612 | 1 | rs10922308  | 197829620 | 10 | rs4133130   | 61984097 |
| 4 | rs116767419 | 103188478 | 1 | rs10922309  | 197829803 | 10 | rs10994259  | 61984604 |
| 4 | rs13107325  | 103188709 | 1 | rs10922311  | 197829948 | 10 | rs16914633  | 61985276 |
| 4 | rs17823966  | 103189036 | 1 | rs16842055  | 197830009 | 10 | rs3927694   | 61985628 |
| 4 | rs13114343  | 103189416 | 1 | rs2047540   | 197830485 | 10 | rs6479705   | 61988375 |
| 4 | rs10489124  | 103189437 | 1 | rs2047541   | 197830838 | 10 | rs10821704  | 61988660 |
| 4 | rs80176743  | 103189686 | 1 | rs12062450  | 197832662 | 10 | rs10740017  | 61989105 |
| 4 | rs17225702  | 103189902 | 1 | rs72744964  | 197832749 | 10 | rs10761469  | 61989593 |
| 4 | rs151401    | 103190128 | 1 | rs10922312  | 197834773 | 10 | rs10994265  | 61991066 |
| 4 | rs17032400  | 103190229 | 1 | rs10922313  | 197836347 | 10 | rs10821705  | 61991969 |
| 4 | rs151402    | 103190486 | 1 | rs10922314  | 197837100 | 10 | rs7903787   | 61993554 |
| 4 | rs4699006   | 103190828 | 1 | rs72744965  | 197837567 | 10 | rs7908312   | 61997885 |
| 4 | rs113926309 | 103191137 | 1 | rs1499601   | 197838452 | 10 | rs10821707  | 61997956 |

|   |             |           |   |             |           |    |             |          |
|---|-------------|-----------|---|-------------|-----------|----|-------------|----------|
| 4 | rs151403    | 103191447 | 1 | rs116785330 | 197839402 | 10 | rs1340654   | 61998060 |
| 4 | rs111057652 | 103192243 | 1 | rs1499602   | 197843204 | 10 | rs4369348   | 61999321 |
| 4 | rs10049581  | 103192893 | 1 | rs75850339  | 197844253 | 10 | rs34117040  | 61999333 |
| 4 | rs11723499  | 170378624 | 1 | rs10801629  | 197844367 | 10 | rs76109618  | 62001552 |
| 4 | rs13120831  | 170562598 | 1 | rs74137403  | 197846588 | 10 | rs140226558 | 62001875 |
| 4 | rs17627781  | 170564316 | 1 | rs76411361  | 197855964 | 10 | rs7908011   | 62003389 |
| 5 | rs10462087  | 45295280  | 1 | rs10801632  | 197856163 | 10 | rs12253367  | 62003462 |
| 5 | rs34635     | 60513501  | 1 | rs115713347 | 197856593 | 10 | rs7901677   | 62005201 |
| 5 | rs159362    | 60522452  | 1 | rs7541116   | 197856736 | 10 | rs78272901  | 62006214 |
| 5 | rs6870703   | 60571540  | 1 | rs74137408  | 197857845 | 10 | rs16914644  | 62006261 |
| 5 | rs13154581  | 60594520  | 1 | rs10922323  | 197862321 | 10 | rs7086638   | 62007342 |
| 5 | rs7717082   | 60769411  | 1 | rs10754235  | 197862598 | 10 | rs7073041   | 62008145 |
| 5 | rs13186194  | 60795485  | 1 | rs61829103  | 197862946 | 10 | rs6479706   | 62008708 |
| 5 | rs6878927   | 60796291  | 1 | rs9662705   | 197863414 | 10 | rs10994278  | 62009219 |
| 5 | rs11747755  | 60833841  | 1 | rs12071207  | 197865112 | 10 | rs10994279  | 62009405 |
| 5 | rs771439    | 88590947  | 1 | rs12086740  | 197865879 | 10 | rs72820470  | 62009435 |
| 5 | rs16867545  | 88623737  | 1 | rs16842085  | 197866243 | 10 | rs16914651  | 62009518 |
| 5 | rs379717    | 88640130  | 1 | rs12138550  | 197866357 | 10 | rs76667912  | 62009709 |
| 5 | rs17507679  | 88644971  | 1 | rs10922324  | 197867405 | 10 | rs35162716  | 62010413 |
| 5 | rs7736534   | 88726337  | 1 | rs10922326  | 197867662 | 10 | rs12767186  | 62010523 |
| 5 | rs9293514   | 88736275  | 1 | rs2062479   | 197868281 | 10 | rs35098882  | 62010755 |
| 5 | rs16867571  | 88743219  | 1 | rs10922327  | 197870378 | 10 | rs72820475  | 62011936 |
| 5 | rs6892330   | 88746405  | 1 | rs111778590 | 197870705 | 10 | rs117653366 | 62012619 |
| 5 | rs4618461   | 88774328  | 1 | rs4565750   | 197871493 | 10 | rs17806245  | 62013067 |
| 5 | rs10514308  | 88780868  | 1 | rs4539165   | 197872019 | 10 | rs16914658  | 62013157 |
| 5 | rs12652212  | 88808594  | 1 | rs72744974  | 197874385 | 10 | rs72820477  | 62013222 |
| 5 | rs1015976   | 109036234 | 1 | rs2270763   | 197874949 | 10 | rs10821708  | 62013424 |
| 5 | rs1370959   | 109039180 | 1 | rs188118779 | 197876393 | 10 | rs35749260  | 62013597 |
| 5 | rs2301010   | 109132461 | 1 | rs4915574   | 197876757 | 10 | rs10994284  | 62014015 |
| 5 | rs11242417  | 137599334 | 1 | rs4147201   | 197877103 | 10 | rs12413212  | 62014315 |
| 5 | rs7726580   | 137608666 | 1 | rs78582470  | 197877332 | 10 | rs12413208  | 62014417 |
| 5 | rs7716275   | 137631073 | 1 | rs10754236  | 197877488 | 10 | rs16914660  | 62014629 |
| 5 | rs10072318  | 137646221 | 1 | rs116514830 | 197877817 | 10 | rs10994285  | 62015007 |
| 5 | rs7715815   | 137660982 | 1 | rs12087257  | 197878701 | 10 | rs10761470  | 62015637 |
| 5 | rs3756765   | 137673004 | 1 | rs78202414  | 197879787 | 10 | rs2018783   | 62015782 |
| 5 | rs3734168   | 137685690 | 1 | rs12567149  | 197880072 | 10 | rs12358938  | 62015926 |
| 5 | rs757647    | 137707315 | 1 | rs11588265  | 197880773 | 10 | rs74344109  | 62016156 |
| 5 | rs4835784   | 137730794 | 1 | rs114974650 | 197881257 | 10 | rs7090893   | 62016923 |
| 5 | rs11956240  | 137840293 | 1 | rs41269901  | 197882114 | 10 | rs16914663  | 62017320 |
| 5 | rs3849046   | 137851192 | 1 | rs1109965   | 197882690 | 10 | rs6479707   | 62018535 |
| 5 | rs256002    | 137895218 | 1 | rs111694034 | 197883809 | 10 | rs7093272   | 62019175 |
| 5 | rs7443140   | 137924729 | 1 | rs79476113  | 197885014 | 10 | rs12413099  | 62019322 |
| 5 | rs7732337   | 137931814 | 1 | rs74922488  | 197885301 | 10 | rs16914668  | 62019749 |
| 5 | rs10900855  | 137937537 | 1 | rs4147202   | 197885543 | 10 | rs1026533   | 62020287 |
| 5 | rs11745933  | 137940165 | 1 | rs41299601  | 197887584 | 10 | rs16914670  | 62020728 |
| 5 | rs11746692  | 137946355 | 1 | rs10494762  | 197887838 | 10 | rs72820489  | 62021146 |
| 5 | rs753280    | 140024042 | 1 | rs112701297 | 197887940 | 10 | rs16914671  | 62021593 |
| 5 | rs778591    | 140025484 | 1 | rs17582664  | 197887985 | 10 | rs41283532  | 62021781 |

|   |            |           |   |             |           |    |             |          |
|---|------------|-----------|---|-------------|-----------|----|-------------|----------|
| 5 | rs2286394  | 140048544 | 1 | rs116019611 | 197888308 | 10 | rs72820490  | 62022121 |
| 5 | rs11954514 | 140056775 | 1 | rs76202560  | 197888309 | 10 | rs16914674  | 62022298 |
| 5 | rs702396   | 140068108 | 1 | rs80079233  | 197888698 | 10 | rs16914677  | 62023034 |
| 5 | rs801167   | 140081423 | 1 | rs12142428  | 197890160 | 10 | rs79524330  | 62024566 |
| 5 | rs2878996  | 140120733 | 1 | rs12122995  | 197890422 | 10 | rs190109826 | 62024899 |
| 5 | rs2563269  | 140136468 | 1 | rs13376365  | 197890802 | 10 | rs72820491  | 62026557 |
| 5 | rs3733708  | 140181734 | 1 | rs12029707  | 197892252 | 10 | rs17232638  | 62026812 |
| 5 | rs3822346  | 140187322 | 1 | rs72744986  | 197892334 | 10 | rs10761471  | 62026984 |
| 5 | rs7702336  | 152137936 | 1 | rs34100116  | 197892551 | 10 | rs16914683  | 62027535 |
| 5 | rs11952081 | 152184299 | 1 | rs78107421  | 197892713 | 10 | rs16914687  | 62027606 |
| 5 | rs6866034  | 152198322 | 1 | rs113221369 | 197892886 | 10 | rs35305500  | 62027683 |
| 5 | rs12659802 | 152274478 | 1 | rs6699938   | 197893152 | 10 | rs12412493  | 62027914 |
| 5 | rs11745863 | 152276092 | 1 | rs11577674  | 197894455 | 10 | rs35175163  | 62028179 |
| 5 | rs4314462  | 152310798 | 1 | rs16829946  | 197895717 | 10 | rs1459731   | 62028797 |
| 5 | rs17489682 | 152312444 | 1 | rs12046958  | 197896728 | 10 | rs16914693  | 62029008 |
| 5 | rs17492381 | 152449415 | 1 | rs4915134   | 197897189 | 10 | rs71495632  | 62029439 |
| 5 | rs12658628 | 152485398 | 1 | rs12750987  | 197897263 | 10 | rs71495633  | 62029934 |
| 5 | rs17578068 | 152489022 | 1 | rs12568860  | 197897332 | 10 | rs72820495  | 62030396 |
| 5 | rs17501123 | 152518117 | 1 | rs10801633  | 197897496 | 10 | rs7894698   | 62030725 |
| 5 | rs13176510 | 152548490 | 1 | rs34095703  | 197897646 | 10 | rs79920459  | 62031981 |
| 5 | rs12152961 | 152566888 | 1 | rs116396834 | 197897715 | 10 | rs117232551 | 62032613 |
| 5 | rs2615160  | 152589262 | 1 | rs146091153 | 197898072 | 10 | rs116945347 | 62033377 |
| 5 | rs35058195 | 152660612 | 1 | rs10801634  | 197900589 | 10 | rs1380453   | 62034355 |
| 5 | rs12522290 | 152797656 | 1 | rs80337194  | 197901727 | 10 | rs72820501  | 62034492 |
| 5 | rs17629195 | 153676502 | 1 | rs77192411  | 197902045 | 10 | rs1380452   | 62034497 |
| 5 | rs6890923  | 153688205 | 1 | rs6667492   | 197902814 | 10 | rs72820502  | 62034855 |
| 6 | rs13210258 | 28308671  | 1 | rs1499598   | 197903352 | 10 | rs72822204  | 62035182 |
| 6 | rs9468344  | 28309569  | 1 | rs74927474  | 197904639 | 10 | rs10740018  | 62035369 |
| 6 | rs6912584  | 28309590  | 1 | rs7511852   | 197905132 | 10 | rs7901951   | 62035501 |
| 6 | rs12180820 | 28316478  | 1 | rs2062482   | 197906223 | 10 | rs7917111   | 62035619 |
| 6 | rs1474589  | 28321544  | 1 | rs10754237  | 197906399 | 10 | rs17807007  | 62036121 |
| 6 | rs213237   | 28323938  | 1 | rs6660393   | 197906821 | 10 | rs7098008   | 62036600 |
| 6 | rs6921919  | 28325201  | 1 | rs12065018  | 197907201 | 10 | rs7068507   | 62037175 |
| 6 | rs6922111  | 28325308  | 1 | rs6428425   | 197907335 | 10 | rs7068443   | 62037334 |
| 6 | rs213230   | 28330264  | 1 | rs34780702  | 197907554 | 10 | rs12783491  | 62037607 |
| 6 | rs213228   | 28331252  | 1 | rs76727189  | 197909395 | 10 | rs17807133  | 62038941 |
| 6 | rs12661831 | 28337769  | 1 | rs16842147  | 197910120 | 10 | rs72822210  | 62039015 |
| 6 | rs7773051  | 28340316  | 1 | rs16842152  | 197910338 | 10 | rs7910984   | 62039577 |
| 6 | rs7774981  | 28346910  | 1 | rs114920504 | 197910455 | 10 | rs1380451   | 62039654 |
| 6 | rs1052215  | 28348158  | 1 | rs16842154  | 197910646 | 10 | rs7911285   | 62039787 |
| 6 | rs2531825  | 28349264  | 1 | rs4915135   | 197910815 | 10 | rs7900123   | 62040133 |
| 6 | rs13213152 | 28349698  | 1 | rs4915136   | 197910860 | 10 | rs6479709   | 62040457 |
| 6 | rs3734563  | 28349725  | 1 | rs17644335  | 197912090 | 10 | rs6479710   | 62040531 |
| 6 | rs3799499  | 28354250  | 1 | rs10922332  | 197912200 | 10 | rs17233373  | 62040699 |
| 6 | rs7764722  | 28354533  | 1 | rs6671069   | 197913101 | 10 | rs922118    | 62041129 |
| 6 | rs9461458  | 28355875  | 1 | rs75638927  | 197913574 | 10 | rs922117    | 62041296 |
| 6 | rs1361385  | 28358320  | 1 | rs78941389  | 197913768 | 10 | rs11592290  | 62041348 |
| 6 | rs2232434  | 28358893  | 1 | rs111868108 | 197914177 | 10 | rs922116    | 62041469 |



|   |            |          |   |             |           |    |             |          |
|---|------------|----------|---|-------------|-----------|----|-------------|----------|
| 6 | rs2041230  | 28365515 | 1 | rs4915255   | 197914298 | 10 | rs10821709  | 62041591 |
| 6 | rs2232423  | 28366151 | 1 | rs73083840  | 197915230 | 10 | rs10821710  | 62041683 |
| 6 | rs2232422  | 28366262 | 1 | rs12727777  | 197915297 | 10 | rs11815139  | 62041733 |
| 6 | rs4357130  | 28367683 | 1 | rs78222204  | 197915363 | 10 | rs12413770  | 62041860 |
| 6 | rs2232419  | 28367768 | 1 | rs17644490  | 197916347 | 10 | rs12780624  | 62042160 |
| 6 | rs9468370  | 28368940 | 1 | rs75850678  | 197916391 | 10 | rs12781705  | 62042207 |
| 6 | rs13196606 | 28370078 | 1 | rs61829143  | 197916580 | 10 | rs10994292  | 62042321 |
| 6 | rs6907950  | 28370246 | 1 | rs115726423 | 197916864 | 10 | rs12782314  | 62042464 |
| 6 | rs6908137  | 28370393 | 1 | rs17644551  | 197918402 | 10 | rs12781443  | 62042627 |
| 6 | rs4254981  | 28371402 | 1 | rs10922333  | 197918487 | 10 | rs12782806  | 62042711 |
| 6 | rs1124131  | 28380248 | 1 | rs10754238  | 197919593 | 10 | rs12769536  | 62044194 |
| 6 | rs6899389  | 28381140 | 1 | rs1909507   | 197919693 | 10 | rs12770090  | 62044341 |
| 6 | rs1558205  | 28382262 | 1 | rs116245320 | 197920994 | 10 | rs7076645   | 62044411 |
| 6 | rs6922169  | 28382932 | 1 | rs115328872 | 197921246 | 10 | rs72822218  | 62044526 |
| 6 | rs10484540 | 28387443 | 1 | rs2047539   | 197922395 | 10 | rs68143724  | 62044939 |
| 6 | rs16894091 | 28390137 | 1 | rs10922335  | 197924313 | 10 | rs71495634  | 62045287 |
| 6 | rs16894095 | 28390230 | 1 | rs17583875  | 197924770 | 10 | rs1856828   | 62045474 |
| 6 | rs1015690  | 28390526 | 1 | rs10922337  | 197925320 | 10 | rs10994293  | 62045698 |
| 6 | rs3800328  | 28390843 | 1 | rs35355724  | 197925416 | 10 | rs35044728  | 62045776 |
| 6 | rs2859365  | 28391465 | 1 | rs35202895  | 197925500 | 10 | rs75728162  | 62045878 |
| 6 | rs1339898  | 28395506 | 1 | rs10922338  | 197926219 | 10 | rs10821711  | 62045932 |
| 6 | rs7740351  | 28399412 | 1 | rs116259466 | 197926427 | 10 | rs75817524  | 62046071 |
| 6 | rs16894106 | 28400339 | 1 | rs4319370   | 197927281 | 10 | rs56228657  | 62046696 |
| 6 | rs7766356  | 28400538 | 1 | rs2358777   | 197927351 | 10 | rs12765897  | 62046981 |
| 6 | rs11752919 | 28403603 | 1 | rs77638754  | 197927517 | 10 | rs898330    | 62047141 |
| 6 | rs719370   | 28404353 | 1 | rs2088651   | 197927580 | 10 | rs898329    | 62047282 |
| 6 | rs6917130  | 28406821 | 1 | rs73067246  | 197927922 | 10 | rs2893831   | 62047414 |
| 6 | rs916403   | 28408258 | 1 | rs61262489  | 197928019 | 10 | rs898328    | 62047594 |
| 6 | rs2531803  | 28411220 | 1 | rs78639059  | 197928107 | 10 | rs71495635  | 62048169 |
| 6 | rs13190937 | 28411244 | 1 | rs76367837  | 197928113 | 10 | rs7095717   | 62048219 |
| 6 | rs2531804  | 28411303 | 1 | rs79951598  | 197928250 | 10 | rs10821712  | 62048404 |
| 6 | rs6902687  | 28413491 | 1 | rs871874    | 197928523 | 10 | rs10509128  | 62051027 |
| 6 | rs13215804 | 28415572 | 1 | rs2173568   | 197928569 | 10 | rs74395695  | 62051471 |
| 6 | rs6939966  | 28415885 | 1 | rs871873    | 197928693 | 10 | rs34874762  | 62052396 |
| 6 | rs11755387 | 28416034 | 1 | rs549890    | 197929497 | 10 | rs79191744  | 62053005 |
| 6 | rs6903535  | 28417222 | 1 | rs80241185  | 197931243 | 10 | rs34397303  | 62053692 |
| 6 | rs2531809  | 28421368 | 1 | rs10922339  | 197932391 | 10 | rs34246330  | 62054315 |
| 6 | rs2859369  | 28421567 | 1 | rs72745000  | 197932974 | 10 | rs1890951   | 62054706 |
| 6 | rs1041926  | 28426296 | 1 | rs72745001  | 197933628 | 10 | rs7917654   | 62054746 |
| 6 | rs2859374  | 28428145 | 1 | rs12131587  | 197935734 | 10 | rs10821713  | 62055781 |
| 6 | rs9468379  | 28431184 | 1 | rs11583952  | 197935915 | 10 | rs7074145   | 62057445 |
| 6 | rs2531815  | 28436060 | 1 | rs413713    | 197937674 | 10 | rs17233871  | 62058055 |
| 6 | rs12663002 | 28441634 | 1 | rs1233789   | 197938330 | 10 | rs117318553 | 62058259 |
| 6 | rs16894128 | 28444165 | 1 | rs545711    | 197939323 | 10 | rs1542462   | 62058396 |
| 6 | rs1029328  | 28447915 | 1 | rs2497866   | 197942485 | 10 | rs11814450  | 62059268 |
| 6 | rs1015811  | 28448086 | 2 | rs820950    | 57738723  | 10 | rs10994296  | 62060128 |
| 6 | rs7770236  | 28450437 | 2 | rs17809900  | 57781156  | 10 | rs10761473  | 62060382 |
| 6 | rs2859355  | 28461221 | 2 | rs10204095  | 57799040  | 10 | rs79186648  | 62061798 |

|   |            |          |   |             |           |    |             |          |
|---|------------|----------|---|-------------|-----------|----|-------------|----------|
| 6 | rs2859356  | 28465355 | 2 | rs1527620   | 57803775  | 10 | rs35412732  | 62061910 |
| 6 | rs12661782 | 28466442 | 2 | rs12621120  | 57806497  | 10 | rs35628300  | 62062235 |
| 6 | rs2071966  | 28473325 | 2 | rs17049010  | 57849676  | 10 | rs143228825 | 62062601 |
| 6 | rs722788   | 28483150 | 2 | rs2612313   | 57872702  | 10 | rs10740022  | 62062686 |
| 6 | rs406113   | 28483482 | 2 | rs10199564  | 57897886  | 10 | rs12770309  | 62063636 |
| 6 | rs11757000 | 28484869 | 2 | rs10496076  | 57942987  | 10 | rs34517433  | 62063862 |
| 6 | rs2078035  | 28488034 | 2 | rs17228035  | 57943078  | 10 | rs79665096  | 62064522 |
| 6 | rs11757235 | 28489279 | 2 | rs1460255   | 57978858  | 10 | rs12217983  | 62064858 |
| 6 | rs445870   | 28494327 | 2 | rs11682175  | 57987593  | 10 | rs10821714  | 62065131 |
| 6 | rs2064424  | 28495962 | 2 | rs1106090   | 58068741  | 10 | rs118182049 | 62065307 |
| 6 | rs380879   | 28500449 | 2 | rs10167352  | 58099420  | 10 | rs10443926  | 62065993 |
| 6 | rs448450   | 28501006 | 2 | rs118197020 | 58130326  | 10 | rs77696714  | 62066817 |
| 6 | rs451774   | 28502550 | 2 | rs2717001   | 58137618  | 10 | rs997238    | 62067448 |
| 6 | rs13215054 | 28502794 | 2 | rs2717002   | 58142647  | 10 | rs10761476  | 62068818 |
| 6 | rs392230   | 28504639 | 2 | rs2678880   | 58158283  | 10 | rs1551685   | 62069346 |
| 6 | rs2394102  | 28512017 | 2 | rs2717023   | 58161355  | 10 | rs9645495   | 62070650 |
| 6 | rs393414   | 28521316 | 2 | rs2717024   | 58161397  | 10 | rs9299440   | 62070695 |
| 6 | rs6456825  | 28522695 | 2 | rs2678889   | 58164223  | 10 | rs10821716  | 62070753 |
| 6 | rs414745   | 28526655 | 2 | rs2717031   | 58166468  | 10 | rs9645496   | 62070777 |
| 6 | rs12110753 | 28529994 | 2 | rs2717040   | 58169494  | 10 | rs10509129  | 62071041 |
| 6 | rs4711174  | 28532960 | 2 | rs1568253   | 58170004  | 10 | rs10821717  | 62072030 |
| 6 | rs418092   | 28533946 | 2 | rs1518395   | 58208074  | 10 | rs117579984 | 62072102 |
| 6 | rs450630   | 28542424 | 2 | rs6732310   | 58210239  | 10 | rs71495636  | 62072491 |
| 6 | rs370520   | 28542520 | 2 | rs2312147   | 58222928  | 10 | rs10761477  | 62072704 |
| 6 | rs17336532 | 28543264 | 2 | rs11692441  | 156950640 | 10 | rs10761480  | 62072740 |
| 6 | rs16901848 | 28546952 | 2 | rs2001859   | 156973115 | 10 | rs1471246   | 62074139 |
| 6 | rs7738979  | 28557312 | 2 | rs1519805   | 156981694 | 10 | rs1471247   | 62074280 |
| 6 | rs6901724  | 28565827 | 2 | rs2049582   | 157030835 | 10 | rs7087252   | 62074676 |
| 6 | rs418914   | 28568528 | 2 | rs2037341   | 157032115 | 10 | rs78254522  | 62074720 |
| 6 | rs442439   | 28573006 | 2 | rs16840135  | 157126321 | 10 | rs187202361 | 62075176 |
| 6 | rs911178   | 28574415 | 2 | rs707124    | 157133013 | 10 | rs10821718  | 62075547 |
| 6 | rs9501180  | 28579471 | 2 | rs298247    | 157233542 | 10 | rs7079856   | 62075859 |
| 6 | rs16894171 | 28602272 | 2 | rs298259    | 157324825 | 10 | rs34098396  | 62075983 |
| 6 | rs7743296  | 28614610 | 2 | rs297581    | 157352418 | 10 | rs74807157  | 62076002 |
| 6 | rs9295775  | 28627469 | 3 | rs3852012   | 44045981  | 10 | rs10761481  | 62076836 |
| 6 | rs13194504 | 28630691 | 3 | rs2372580   | 44049945  | 10 | rs1340652   | 62078203 |
| 6 | rs7767008  | 28630793 | 3 | rs11718455  | 44056898  | 10 | rs1340653   | 62078300 |
| 6 | rs4713175  | 28635592 | 3 | rs17076342  | 44079629  | 10 | rs7090125   | 62078350 |
| 6 | rs16894191 | 28641689 | 3 | rs9871447   | 44079944  | 10 | rs61847721  | 62079905 |
| 6 | rs3864294  | 28641957 | 3 | rs9311350   | 44132988  | 10 | rs7899737   | 62080698 |
| 6 | rs9393921  | 28645170 | 3 | rs6800118   | 44141157  | 10 | rs10821723  | 62082737 |
| 6 | rs16894197 | 28648271 | 3 | rs6796191   | 44167389  | 10 | rs1350632   | 62082738 |
| 6 | rs9885928  | 28650353 | 3 | rs7626631   | 44197258  | 10 | rs11593403  | 62083210 |
| 6 | rs1319075  | 28662521 | 3 | rs1488637   | 44332176  | 10 | rs34314912  | 62083421 |
| 6 | rs7382112  | 28665109 | 3 | rs9819635   | 44425991  | 10 | rs1459730   | 62084405 |
| 6 | rs12111360 | 28667448 | 3 | rs9855152   | 44458730  | 10 | rs10761482  | 62085337 |
| 6 | rs6939576  | 28669315 | 3 | rs9857883   | 157887272 | 10 | rs78776747  | 62086339 |
| 6 | rs6908726  | 28671343 | 3 | rs2693540   | 158001555 | 10 | rs75448159  | 62086401 |

|   |            |          |   |            |           |    |             |          |
|---|------------|----------|---|------------|-----------|----|-------------|----------|
| 6 | rs1107160  | 28671422 | 3 | rs1210359  | 158007807 | 10 | rs10740023  | 62088266 |
| 6 | rs1107159  | 28671723 | 3 | rs827168   | 158018849 | 10 | rs149355724 | 62091722 |
| 6 | rs9368570  | 28676193 | 3 | rs12107103 | 158126282 | 10 | rs12217173  | 62091912 |
| 6 | rs1539584  | 28679945 | 3 | rs4680433  | 158136848 | 10 | rs7911934   | 62092090 |
| 6 | rs9366725  | 28685981 | 3 | rs1714509  | 158252958 | 10 | rs12219340  | 62092193 |
| 6 | rs6909960  | 28688921 | 3 | rs7613824  | 158286152 | 10 | rs4612751   | 62092917 |
| 6 | rs9468413  | 28689672 | 3 | rs6804230  | 158314188 | 10 | rs117907293 | 62093601 |
| 6 | rs1954407  | 28695149 | 3 | rs1845138  | 158343907 | 10 | rs7093702   | 62093709 |
| 6 | rs9393929  | 28696063 | 4 | rs7658646  | 41820275  | 10 | rs991405    | 62094202 |
| 6 | rs2893973  | 28697086 | 4 | rs6840961  | 41827875  | 10 | rs2199209   | 62094738 |
| 6 | rs7755641  | 28699369 | 4 | rs6447115  | 41841212  | 10 | rs2199210   | 62094752 |
| 6 | rs6456834  | 28700352 | 4 | rs6447117  | 41846084  | 10 | rs2219533   | 62094914 |
| 6 | rs7766599  | 28703432 | 4 | rs7655001  | 41882915  | 10 | rs2219534   | 62094925 |
| 6 | rs880638   | 28706912 | 4 | rs17445354 | 41964337  | 10 | rs972404    | 62095851 |
| 6 | rs13211284 | 73157730 | 4 | rs6447132  | 42134066  | 10 | rs78038591  | 62096784 |
| 6 | rs2781571  | 73170429 | 4 | rs7667105  | 42147852  | 10 | rs1380459   | 62097331 |
| 6 | rs11756746 | 84286477 | 4 | rs10034294 | 42187640  | 10 | rs10994306  | 62097576 |
| 6 | rs9362001  | 84322084 | 4 | rs6852533  | 42195808  | 10 | rs990685    | 62098149 |
| 7 | rs7788921  | 1915282  | 4 | rs6857570  | 42208939  | 10 | rs10761483  | 62098398 |
| 7 | rs10275045 | 1920826  | 4 | rs9999533  | 42211367  | 10 | rs10761484  | 62098458 |
| 7 | rs10278591 | 1921362  | 4 | rs7697417  | 42215425  | 10 | rs56156031  | 62098699 |
| 7 | rs10267593 | 1937261  | 4 | rs7696007  | 42287348  | 10 | rs56303906  | 62098775 |
| 7 | rs6952727  | 1947958  | 5 | rs17419291 | 87780432  | 10 | rs10994308  | 62098952 |
| 7 | rs12537914 | 1948359  | 5 | rs16903182 | 87786580  | 10 | rs10821727  | 62099113 |
| 7 | rs4721184  | 1950784  | 5 | rs16903184 | 87787332  | 10 | rs10821729  | 62099173 |
| 7 | rs4332037  | 1950809  | 5 | rs16903232 | 87831734  | 10 | rs10821730  | 62099271 |
| 7 | rs11772205 | 1951236  | 5 | rs992623   | 87840688  | 10 | rs10821731  | 62099554 |
| 7 | rs2056480  | 1954301  | 5 | rs10078467 | 87877474  | 10 | rs10821732  | 62099814 |
| 7 | rs4721190  | 1954732  | 5 | rs1501672  | 87963761  | 10 | rs1903203   | 62100164 |
| 7 | rs10268609 | 1962163  | 5 | rs661311   | 88034867  | 10 | rs117577974 | 62100612 |
| 7 | rs12699477 | 1968953  | 5 | rs3729703  | 88047617  | 10 | rs10740024  | 62100840 |
| 7 | rs2280550  | 1976556  | 5 | rs622803   | 88069593  | 10 | rs74775577  | 62101179 |
| 7 | rs10237340 | 1987092  | 5 | rs674747   | 88079010  | 10 | rs79644767  | 62101236 |
| 7 | rs1113737  | 1993078  | 5 | rs244755   | 88095785  | 10 | rs4442496   | 62101371 |
| 7 | rs11773627 | 2002733  | 5 | rs304151   | 88125853  | 10 | rs4600155   | 62101381 |
| 7 | rs12666575 | 2004421  | 5 | rs11951031 | 88138731  | 10 | rs4245587   | 62101589 |
| 7 | rs3996329  | 2018871  | 5 | rs7721449  | 103692385 | 10 | rs4245588   | 62101746 |
| 7 | rs4721295  | 2036669  | 5 | rs1583953  | 103750804 | 10 | rs1473404   | 62102316 |
| 7 | rs1107592  | 2041432  | 5 | rs1442112  | 103788551 | 10 | rs2169081   | 62102389 |
| 7 | rs7785626  | 2103005  | 5 | rs2028527  | 103789492 | 10 | rs10761485  | 62102660 |
| 7 | rs6461115  | 2103668  | 5 | rs6881764  | 103810310 | 10 | rs2061487   | 62102842 |
| 7 | rs3800879  | 2120378  | 5 | rs4703034  | 103812072 | 10 | rs2061488   | 62103166 |
| 7 | rs1558462  | 2121196  | 5 | rs10077445 | 103820340 | 10 | rs2061489   | 62103196 |
| 7 | rs10224497 | 2149967  | 5 | rs10064760 | 103900475 | 10 | rs4456215   | 62103249 |
| 7 | rs10239050 | 2158390  | 5 | rs768905   | 103909664 | 10 | rs10821733  | 62103405 |
| 7 | rs3800913  | 2163237  | 5 | rs1363103  | 103917837 | 10 | rs10821734  | 62103412 |
| 7 | rs3800917  | 2167939  | 5 | rs326236   | 103969568 | 10 | rs2061490   | 62103662 |
| 7 | rs3778991  | 2172455  | 5 | rs33819    | 103980038 | 10 | rs2061491   | 62103675 |

|   |            |           |   |            |           |    |             |          |
|---|------------|-----------|---|------------|-----------|----|-------------|----------|
| 7 | rs3778994  | 2175855   | 5 | rs40465    | 103981726 | 10 | rs2061492   | 62104016 |
| 7 | rs4721441  | 2184060   | 5 | rs6596581  | 103983318 | 10 | rs10761486  | 62104303 |
| 7 | rs3779003  | 2184902   | 5 | rs325523   | 104045386 | 10 | rs10761487  | 62104309 |
| 7 | rs3800924  | 2188249   | 5 | rs1370192  | 104069562 | 10 | rs5009084   | 62104413 |
| 7 | rs2529038  | 24620682  | 5 | rs60271    | 104078233 | 10 | rs4520549   | 62104516 |
| 7 | rs2711091  | 24622086  | 5 | rs17431165 | 104131657 | 10 | rs4406773   | 62104574 |
| 7 | rs2711130  | 24646774  | 5 | rs7701167  | 104152321 | 10 | rs4290174   | 62104583 |
| 7 | rs6943306  | 24701995  | 5 | rs12188289 | 104154736 | 10 | rs4620673   | 62104704 |
| 7 | rs1053962  | 24703298  | 5 | rs10079325 | 104157752 | 10 | rs4291629   | 62104758 |
| 7 | rs2721777  | 24735746  | 5 | rs6881692  | 124002868 | 10 | rs4582919   | 62104776 |
| 7 | rs2074142  | 24742585  | 5 | rs12656846 | 124027136 | 10 | rs4615975   | 62104917 |
| 7 | rs10269819 | 24761117  | 5 | rs12513661 | 124038251 | 10 | rs4488150   | 62104918 |
| 7 | rs2721794  | 24766507  | 5 | rs11739274 | 124097421 | 10 | rs10821735  | 62104980 |
| 7 | rs2521760  | 24767483  | 5 | rs4435859  | 124127720 | 10 | rs55749838  | 62105048 |
| 7 | rs886234   | 24769231  | 5 | rs6882715  | 124129139 | 10 | rs10821736  | 62105053 |
| 7 | rs2237318  | 24769278  | 5 | rs17152077 | 124157377 | 10 | rs10994309  | 62105197 |
| 7 | rs2237322  | 24770740  | 5 | rs13166453 | 124186673 | 10 | rs2061484   | 62105498 |
| 7 | rs2521766  | 24772686  | 5 | rs7716491  | 124237873 | 10 | rs114427798 | 62105627 |
| 7 | rs2237326  | 24797764  | 5 | rs17254960 | 124284253 | 10 | rs2061486   | 62105916 |
| 7 | rs1468185  | 24818656  | 5 | rs7707774  | 124288960 | 10 | rs10761488  | 62105992 |
| 7 | rs2237565  | 86455536  | 5 | rs4240384  | 124291402 | 10 | rs10994310  | 62106169 |
| 7 | rs9655780  | 104667334 | 5 | rs6875187  | 124302354 | 10 | rs7096250   | 62106319 |
| 7 | rs10268866 | 104676522 | 5 | rs6864049  | 124330522 | 10 | rs7096426   | 62106545 |
| 7 | rs74959149 | 104752798 | 5 | rs9327345  | 124339414 | 10 | rs7097138   | 62106755 |
| 7 | rs1142     | 104756326 | 5 | rs12519279 | 124352162 | 10 | rs113566024 | 62106814 |
| 7 | rs1144     | 104756355 | 5 | rs7711673  | 124389912 | 10 | rs78930856  | 62106879 |
| 7 | rs10257135 | 104893565 | 5 | rs11741674 | 124443316 | 10 | rs7084499   | 62106882 |
| 7 | rs2079341  | 104904235 | 5 | rs17515224 | 124458899 | 10 | rs7084803   | 62107101 |
| 7 | rs12155351 | 104943302 | 5 | rs1550362  | 124480197 | 10 | rs7100985   | 62107166 |
| 7 | rs7783665  | 110039196 | 5 | rs1550363  | 124480529 | 10 | rs7085259   | 62107418 |
| 7 | rs4730430  | 110047964 | 5 | rs2963114  | 164314792 | 10 | rs4948402   | 62107452 |
| 7 | rs37713    | 110876320 | 5 | rs2962865  | 164321412 | 10 | rs4948403   | 62107662 |
| 7 | rs2109298  | 110899634 | 5 | rs17070336 | 164333983 | 10 | rs1380458   | 62107690 |
| 7 | rs11973097 | 110925758 | 5 | rs4438895  | 164458965 | 10 | rs10821737  | 62107802 |
| 7 | rs37642    | 110977344 | 5 | rs12233994 | 164522107 | 10 | rs117704797 | 62108032 |
| 7 | rs17443228 | 110986897 | 5 | rs4535473  | 164561899 | 10 | rs3919830   | 62108205 |
| 7 | rs37667    | 111022481 | 5 | rs13178865 | 164637211 | 10 | rs10994311  | 62108380 |
| 7 | rs4730488  | 111166165 | 5 | rs1347153  | 164675241 | 10 | rs4948405   | 62108419 |
| 7 | rs320714   | 137058206 | 5 | rs10076744 | 164682302 | 10 | rs10761489  | 62108604 |
| 7 | rs2278101  | 137080712 | 5 | rs1432992  | 164749340 | 10 | rs10761490  | 62108666 |
| 8 | rs10503253 | 4180844   | 5 | rs7356565  | 164755174 | 10 | rs10761491  | 62108718 |
| 8 | rs1504753  | 4181761   | 5 | rs10045813 | 164762427 | 10 | rs10761492  | 62108901 |
| 8 | rs10503255 | 4185116   | 5 | rs6555745  | 166851301 | 10 | rs10761489  | 62108992 |
| 8 | rs10866968 | 4188511   | 5 | rs6887290  | 166866356 | 10 | rs77914050  | 62109199 |
| 8 | rs1875897  | 4188891   | 5 | rs1030668  | 166876427 | 10 | rs10733763  | 62109280 |
| 8 | rs10104209 | 4189745   | 5 | rs1864975  | 166887628 | 10 | rs10821738  | 62109449 |
| 8 | rs10091134 | 4190222   | 5 | rs1025482  | 166893257 | 10 | rs10821739  | 62109643 |
| 8 | rs10105113 | 4190489   | 5 | rs6886928  | 166984125 | 10 | rs80244005  | 62109808 |

|   |             |          |   |             |           |    |             |          |
|---|-------------|----------|---|-------------|-----------|----|-------------|----------|
| 8 | rs10107472  | 4190874  | 5 | rs2243779   | 167084904 | 10 | rs7089563   | 62109898 |
| 8 | rs10108725  | 4191202  | 5 | rs4432913   | 167098323 | 10 | rs7073512   | 62109926 |
| 8 | rs1316801   | 27429228 | 5 | rs10072896  | 167169068 | 10 | rs4948406   | 62110146 |
| 8 | rs10101705  | 60746801 | 5 | rs13436693  | 167170953 | 10 | rs4948407   | 62110199 |
| 8 | rs6471835   | 60746997 | 5 | rs1862875   | 167182055 | 10 | rs4948408   | 62110213 |
| 8 | rs17322350  | 60747478 | 5 | rs10516038  | 167189612 | 10 | rs78075604  | 62110349 |
| 8 | rs16925436  | 60839349 | 5 | rs1364370   | 167196549 | 10 | rs719095    | 62110949 |
| 8 | rs17343814  | 60855552 | 5 | rs918795    | 167219451 | 10 | rs1417380   | 62111286 |
| 8 | rs7843474   | 60870371 | 6 | rs7767714   | 30488033  | 10 | rs117614337 | 62112052 |
| 8 | rs12677791  | 89342944 | 6 | rs7768140   | 30488203  | 10 | rs111318357 | 62112452 |
| 8 | rs80039465  | 89343849 | 6 | rs2534826   | 30495417  | 10 | rs10740026  | 62112842 |
| 8 | rs10504845  | 89345187 | 6 | rs2534825   | 30495743  | 10 | rs12412727  | 62113656 |
| 8 | rs4395935   | 89348420 | 6 | rs3094024   | 30495860  | 10 | rs10821740  | 62113686 |
| 8 | rs35175011  | 89352411 | 6 | rs2534824   | 30496160  | 10 | rs10761493  | 62113852 |
| 8 | rs73275292  | 89365808 | 6 | rs2534823   | 30496816  | 10 | rs79161527  | 62115295 |
| 8 | rs60298754  | 89373041 | 6 | rs2516649   | 30496882  | 10 | rs61846510  | 62115417 |
| 8 | rs17730333  | 89376304 | 6 | rs2524226   | 30497490  | 10 | rs10821741  | 62115503 |
| 8 | rs73277117  | 89381207 | 6 | rs2534816   | 30498864  | 10 | rs4948409   | 62115820 |
| 8 | rs117758893 | 89382014 | 6 | rs2534815   | 30499127  | 10 | rs4948411   | 62115986 |
| 8 | rs1504801   | 89383727 | 6 | rs61123281  | 30499599  | 10 | rs4948410   | 62116047 |
| 8 | rs76034445  | 89388604 | 6 | rs1362119   | 30499732  | 10 | rs4948411   | 62116075 |
| 8 | rs73277199  | 89395808 | 6 | rs111960990 | 30501110  | 10 | rs117787386 | 62116838 |
| 8 | rs1012116   | 89397267 | 6 | rs115484417 | 30501334  | 10 | rs61846511  | 62117557 |
| 8 | rs4369037   | 89397431 | 6 | rs78000963  | 30502802  | 10 | rs78880049  | 62117588 |
| 8 | rs80287386  | 89416077 | 6 | rs2516644   | 30503945  | 10 | rs2393625   | 62119206 |
| 8 | rs188295362 | 89416196 | 6 | rs62407243  | 30505000  | 10 | rs116946203 | 62120764 |
| 8 | rs79676922  | 89438949 | 6 | rs2524224   | 30505948  | 10 | rs61846514  | 62121036 |
| 8 | rs117646114 | 89475140 | 6 | rs1468079   | 30506383  | 10 | rs10509130  | 62121112 |
| 8 | rs13280546  | 89477936 | 6 | rs3130117   | 30508956  | 10 | rs7083624   | 62121239 |
| 8 | rs821109    | 89499611 | 6 | rs2524222   | 30511170  | 10 | rs7083556   | 62121387 |
| 8 | rs58139040  | 89506295 | 6 | rs1058318   | 30512163  | 10 | rs7087958   | 62121891 |
| 8 | rs716881    | 89516441 | 6 | rs12192673  | 30512505  | 10 | rs78309756  | 62122460 |
| 8 | rs7826357   | 89542166 | 6 | rs17195411  | 30512603  | 10 | rs10994312  | 62122704 |
| 8 | rs6990990   | 89548722 | 6 | rs3815101   | 30514810  | 10 | rs10994313  | 62122781 |
| 8 | rs16884251  | 89555353 | 6 | rs3130247   | 30515043  | 10 | rs117443225 | 62122837 |
| 8 | rs16884273  | 89558684 | 6 | rs2844715   | 30516353  | 10 | rs12411733  | 62123046 |
| 8 | rs35385383  | 89566464 | 6 | rs2516640   | 30516458  | 10 | rs7916917   | 62123334 |
| 8 | rs1352318   | 89566903 | 6 | rs2844714   | 30518619  | 10 | rs61846516  | 62123438 |
| 8 | rs7819913   | 89568393 | 6 | rs2844713   | 30519258  | 10 | rs7917112   | 62123665 |
| 8 | rs1580508   | 89570460 | 6 | rs115134085 | 30519619  | 10 | rs7906868   | 62124745 |
| 8 | rs7814164   | 89573045 | 6 | rs2074505   | 30521137  | 10 | rs7894561   | 62125620 |
| 8 | rs13263450  | 89574375 | 6 | rs2516647   | 30526845  | 10 | rs77560928  | 62125814 |
| 8 | rs10504857  | 89582625 | 6 | rs114055010 | 30527296  | 10 | rs71495639  | 62126881 |
| 8 | rs7838490   | 89585048 | 6 | rs3888778   | 30529622  | 10 | rs79359809  | 62127811 |
| 8 | rs4484741   | 89605536 | 6 | rs3888777   | 30529816  | 10 | rs79663415  | 62127823 |
| 8 | rs9969514   | 89605999 | 6 | rs17189092  | 30529873  | 10 | rs10821744  | 62127894 |
| 8 | rs4269585   | 89608690 | 6 | rs2074504   | 30530245  | 10 | rs1981251   | 62127927 |
| 8 | rs4534168   | 89609651 | 6 | rs2074503   | 30530496  | 10 | rs74563482  | 62128085 |

|    |            |           |   |               |          |    |             |          |
|----|------------|-----------|---|---------------|----------|----|-------------|----------|
| 8  | rs13272330 | 89615855  | 6 | rs114423170   | 30531413 | 10 | rs76446094  | 62128096 |
| 8  | rs6990941  | 89644431  | 6 | rs9262113     | 30532278 | 10 | rs75362238  | 62128472 |
| 8  | rs12334864 | 89646080  | 6 | rs3130240     | 30536071 | 10 | rs34939353  | 62128506 |
| 8  | rs11995369 | 89649177  | 6 | rs3130041     | 30536133 | 10 | rs77938911  | 62128671 |
| 8  | rs13257525 | 89677161  | 6 | rs3130242     | 30537339 | 10 | rs78743852  | 62128831 |
| 8  | rs16886095 | 89713000  | 6 | rs3132613     | 30537606 | 10 | rs79131601  | 62129592 |
| 8  | rs7833665  | 89721771  | 6 | rs3130243     | 30537853 | 10 | rs10994319  | 62130265 |
| 8  | rs7829812  | 89722274  | 6 | rs28360036    | 30538821 | 10 | rs3851251   | 62130429 |
| 8  | rs13262894 | 111532085 | 6 | rs4148247     | 30539205 | 10 | rs1824405   | 62130662 |
| 8  | rs13274273 | 111572122 | 6 | rs3132612     | 30539438 | 10 | rs7072841   | 62131838 |
| 8  | rs10098073 | 143309504 | 6 | rs2269710     | 30539952 | 10 | rs77917688  | 62131991 |
| 9  | rs1319017  | 84736303  | 6 | rs2269709     | 30540890 | 10 | rs80215809  | 62132010 |
| 9  | rs4442221  | 84750462  | 6 | rs1264451     | 30541237 | 10 | rs1459728   | 62132129 |
| 9  | rs4877686  | 84765612  | 6 | rs6927603     | 30541696 | 10 | rs1380455   | 62132820 |
| 10 | rs1570939  | 18685891  | 6 | rs3132611     | 30541852 | 10 | rs74707031  | 62132830 |
| 10 | rs7909027  | 18695892  | 6 | Chr6:30652032 | 30544053 | 10 | rs1380454   | 62133051 |
| 10 | rs11593522 | 18705120  | 6 | rs3132610     | 30544401 | 10 | rs78050293  | 62133183 |
| 10 | rs11014171 | 18711195  | 6 | rs732229      | 30544941 | 10 | rs1010556   | 62133503 |
| 10 | rs4747345  | 18712352  | 6 | rs3132609     | 30544982 | 10 | rs1010555   | 62133881 |
| 10 | rs10741058 | 18716145  | 6 | rs3130043     | 30545022 | 10 | rs76976576  | 62133978 |
| 10 | rs4548524  | 18716867  | 6 | rs113473909   | 30545879 | 10 | rs78638255  | 62134176 |
| 10 | rs4145903  | 18718052  | 6 | rs1264440     | 30551286 | 10 | rs117134507 | 62135194 |
| 10 | rs10828705 | 18735355  | 6 | rs1264439     | 30552502 | 10 | rs10994321  | 62135206 |
| 10 | rs12243859 | 18740632  | 6 | rs3130244     | 30552937 | 10 | rs75396339  | 62135257 |
| 10 | rs12219393 | 18755609  | 6 | rs17195453    | 30553869 | 10 | rs10821745  | 62136206 |
| 10 | rs10828749 | 18756881  | 6 | rs1264437     | 30553871 | 10 | rs10994322  | 62136279 |
| 10 | rs1409204  | 18763822  | 6 | rs192021424   | 30554183 | 10 | rs75342328  | 62136934 |
| 10 | rs4919685  | 104587362 | 6 | rs116294079   | 30560620 | 10 | rs4147263   | 62137665 |
| 10 | rs72841265 | 104587617 | 6 | rs13195066    | 30560796 | 10 | rs1459727   | 62138491 |
| 10 | rs10883783 | 104591152 | 6 | rs7749109     | 30561724 | 10 | rs10821746  | 62140840 |
| 10 | rs284849   | 104591182 | 6 | rs1264432     | 30562021 | 10 | rs72806126  | 62142611 |
| 10 | rs17115100 | 104591393 | 6 | rs7749978     | 30562041 | 10 | rs7895653   | 62143348 |
| 10 | rs45609333 | 104591639 | 6 | rs6917434     | 30562647 | 10 | rs72806129  | 62143522 |
| 10 | rs284848   | 104592125 | 6 | rs1264431     | 30562671 | 10 | rs7896287   | 62143794 |
| 10 | rs4919686  | 104592249 | 6 | rs17189120    | 30563362 | 10 | rs72806131  | 62144801 |
| 10 | rs3740397  | 104592675 | 6 | rs112559044   | 30563495 | 10 | rs79475892  | 62145056 |
| 10 | rs1004467  | 104594507 | 6 | rs9262119     | 30563550 | 10 | rs72806132  | 62145736 |
| 10 | rs743575   | 104594906 | 6 | rs6934466     | 30563608 | 10 | rs10994324  | 62145937 |
| 10 | rs4919687  | 104595248 | 6 | rs3130245     | 30564343 | 10 | rs117881056 | 62145992 |
| 10 | rs3781287  | 104595420 | 6 | rs1264429     | 30565101 | 10 | rs117269095 | 62146003 |
| 10 | rs3781286  | 104595719 | 6 | rs7742754     | 30566154 | 10 | rs72806133  | 62146403 |
| 10 | rs3824755  | 104595849 | 6 | rs6457246     | 30566254 | 10 | rs4948412   | 62146576 |
| 10 | rs45463800 | 104596356 | 6 | rs3216457     | 30567843 | 10 | rs4948413   | 62146640 |
| 10 | rs10786712 | 104596396 | 6 | rs7759666     | 30569489 | 10 | rs117011548 | 62148121 |
| 10 | rs6163     | 104596924 | 6 | rs17189134    | 30570480 | 10 | rs16914968  | 62149543 |
| 10 | rs6162     | 104596981 | 6 | rs17195474    | 30571197 | 10 | rs77622274  | 62149864 |
| 10 | rs743572   | 104597152 | 6 | rs1264423     | 30571471 | 10 | rs1551684   | 62150203 |
| 10 | rs2486758  | 104597480 | 6 | rs7742291     | 30573139 | 10 | rs1551683   | 62150359 |

|    |             |           |   |             |          |    |                |          |
|----|-------------|-----------|---|-------------|----------|----|----------------|----------|
| 10 | rs117856379 | 104599959 | 6 | rs7742650   | 30573334 | 10 | rs3808942      | 62150848 |
| 10 | rs79932911  | 104601618 | 6 | rs9262122   | 30573842 | 10 | rs72806134     | 62150926 |
| 10 | rs58109969  | 104602607 | 6 | rs6457248   | 30573866 | 10 | rs72806135     | 62150936 |
| 10 | rs11191416  | 104604916 | 6 | rs12174151  | 30574194 | 10 | rs3808943      | 62151015 |
| 10 | rs79424856  | 104605329 | 6 | rs1264420   | 30575603 | 10 | Chr10:61821276 | 62151270 |
| 10 | rs10509762  | 104606472 | 6 | rs1264419   | 30576781 | 10 | rs7082025      | 62152022 |
| 10 | rs72841269  | 104609654 | 6 | rs60337024  | 30576801 | 10 | rs113238321    | 62152415 |
| 10 | rs7096475   | 104609676 | 6 | rs6901251   | 30577593 | 10 | rs10821747     | 62152721 |
| 10 | rs4290163   | 104610926 | 6 | rs2239514   | 30577792 | 10 | rs76972414     | 62152944 |
| 10 | rs17523050  | 104613945 | 6 | rs2239515   | 30577966 | 10 | rs77787726     | 62153164 |
| 10 | rs3824754   | 104614350 | 6 | rs2239516   | 30578048 | 10 | rs77173454     | 62153253 |
| 10 | rs4919690   | 104616500 | 6 | rs2267637   | 30578335 | 10 | rs4948416      | 62154169 |
| 10 | rs4409766   | 104616663 | 6 | rs2252745   | 30579315 | 10 | rs72806140     | 62154684 |
| 10 | rs76429823  | 104617647 | 6 | rs7767002   | 30579417 | 10 | rs7903441      | 62155308 |
| 10 | rs7096249   | 104618524 | 6 | rs6457249   | 30579556 | 10 | rs12416380     | 62156154 |
| 10 | rs7096169   | 104618695 | 6 | rs17195516  | 30580085 | 10 | rs7907761      | 62156169 |
| 10 | rs10786715  | 104620735 | 6 | rs2267639   | 30580637 | 10 | rs117177424    | 62157655 |
| 10 | rs41287472  | 104621829 | 6 | rs2267640   | 30580893 | 10 | rs79278901     | 62158107 |
| 10 | rs9527      | 104623578 | 6 | rs55777621  | 30584133 | 10 | rs10994326     | 62158385 |
| 10 | rs4917985   | 104624072 | 6 | rs16867845  | 30585333 | 10 | rs72806146     | 62159351 |
| 10 | rs4919691   | 104624475 | 6 | rs2302347   | 30587613 | 10 | rs4948417      | 62161618 |
| 10 | rs17115171  | 104624672 | 6 | rs17189190  | 30589414 | 10 | rs10994327     | 62162053 |
| 10 | rs10786716  | 104625178 | 6 | rs61109058  | 30590377 | 10 | rs72806151     | 62162074 |
| 10 | rs11191424  | 104625886 | 6 | rs35554791  | 30591129 | 10 | rs7087726      | 62162582 |
| 10 | rs11191425  | 104625970 | 6 | rs2270172   | 30592414 | 10 | rs10994330     | 62163439 |
| 10 | rs7098825   | 104628234 | 6 | rs6917935   | 30593075 | 10 | rs1599166      | 62163729 |
| 10 | rs17115179  | 104628624 | 6 | rs34315095  | 30593485 | 10 | rs113984400    | 62164153 |
| 10 | rs17882328  | 104628674 | 6 | rs111850078 | 30594102 | 10 | rs77782467     | 62164346 |
| 10 | rs7085104   | 104628873 | 6 | rs2517565   | 30594394 | 10 | rs72806156     | 62164577 |
| 10 | rs12416687  | 104629011 | 6 | rs3814959   | 30594827 | 10 | rs7909961      | 62165578 |
| 10 | rs4917986   | 104630181 | 6 | rs6904236   | 30596135 | 10 | rs72806158     | 62165906 |
| 10 | rs17878846  | 104630412 | 6 | rs4713340   | 30599702 | 10 | rs72806159     | 62166449 |
| 10 | rs7920697   | 104633337 | 6 | rs13201129  | 30601067 | 10 | rs12776510     | 62167928 |
| 10 | rs10509760  | 104634107 | 6 | rs12665339  | 30601232 | 10 | rs72806162     | 62168629 |
| 10 | rs3740394   | 104634474 | 6 | rs3094104   | 30609629 | 10 | rs7099869      | 62170256 |
| 10 | rs12764049  | 104634956 | 6 | rs3132608   | 30609661 | 10 | rs7100501      | 62170830 |
| 10 | rs12765002  | 104635348 | 6 | rs3132595   | 30610042 | 10 | rs10994331     | 62171445 |
| 10 | rs111450127 | 104635759 | 6 | rs9262132   | 30611350 | 10 | rs10994332     | 62171600 |
| 10 | rs77335224  | 104636276 | 6 | rs1140809   | 30611676 | 10 | rs10761495     | 62171796 |
| 10 | rs3740393   | 104636655 | 6 | rs2269708   | 30611968 | 10 | rs10821753     | 62171983 |
| 10 | rs3740392   | 104636855 | 6 | rs9262135   | 30618906 | 10 | rs79277950     | 62172183 |
| 10 | rs11191434  | 104637508 | 6 | rs17281677  | 30622459 | 10 | rs16914993     | 62172434 |
| 10 | rs11191438  | 104637864 | 6 | rs3094100   | 30625155 | 10 | rs10994333     | 62173051 |
| 10 | rs10786719  | 104637992 | 6 | rs1076829   | 30627216 | 10 | rs12416179     | 62173207 |
| 10 | rs3740391   | 104638421 | 6 | rs9262138   | 30627867 | 10 | rs77543219     | 62174183 |
| 10 | rs3740390   | 104638480 | 6 | rs3130000   | 30628082 | 10 | rs10994334     | 62174663 |
| 10 | rs11191439  | 104638723 | 6 | rs1109146   | 30629648 | 10 | rs12764333     | 62175060 |
| 10 | rs12774047  | 104639738 | 6 | rs4713346   | 30631063 | 10 | rs10994335     | 62175630 |

|    |             |           |   |            |          |    |             |          |
|----|-------------|-----------|---|------------|----------|----|-------------|----------|
| 10 | rs17115203  | 104639969 | 6 | rs3094097  | 30633875 | 10 | rs12256333  | 62175681 |
| 10 | rs149053625 | 104640757 | 6 | rs2285321  | 30637998 | 10 | rs10821757  | 62176620 |
| 10 | rs10883790  | 104640955 | 6 | rs3094094  | 30639412 | 10 | rs10821758  | 62176632 |
| 10 | rs12249194  | 104643698 | 6 | rs6937357  | 30640324 | 10 | rs10821759  | 62176933 |
| 10 | rs72841273  | 104647200 | 6 | rs9468805  | 30643709 | 10 | rs10761496  | 62177690 |
| 10 | rs77505796  | 104647774 | 6 | rs9262141  | 30644137 | 10 | rs10761497  | 62177839 |
| 10 | rs12768205  | 104647849 | 6 | rs6457254  | 30649134 | 10 | rs10821760  | 62178257 |
| 10 | rs7085854   | 104650251 | 6 | rs9262142  | 30650026 | 10 | rs10994336  | 62179812 |
| 10 | rs76255497  | 104651955 | 6 | rs2394392  | 30650318 | 10 | rs79576783  | 62180122 |
| 10 | rs75691516  | 104652045 | 6 | rs3129996  | 30651587 | 10 | rs7092883   | 62180931 |
| 10 | rs11191447  | 104652323 | 6 | rs9262143  | 30652781 | 10 | rs10994338  | 62181128 |
| 10 | rs12763665  | 104653717 | 6 | rs2269706  | 30652872 | 10 | rs1934759   | 62181923 |
| 10 | rs78561456  | 104653872 | 6 | rs2269705  | 30656847 | 10 | rs10994339  | 62182048 |
| 10 | rs11191450  | 104654211 | 6 | rs2269704  | 30656953 | 10 | rs10821761  | 62182269 |
| 10 | rs10883796  | 104655315 | 6 | rs1075496  | 30658239 | 10 | rs10821762  | 62182509 |
| 10 | rs74233296  | 104655350 | 6 | rs2269703  | 30658385 | 10 | rs76861408  | 62183100 |
| 10 | rs80327774  | 104656671 | 6 | rs3130663  | 30666594 | 10 | rs10761498  | 62183385 |
| 10 | rs113282265 | 104657248 | 6 | rs9468811  | 30666669 | 10 | rs950826    | 62183837 |
| 10 | rs11191453  | 104659852 | 6 | rs2894043  | 30668488 | 10 | rs12263856  | 62184500 |
| 10 | rs11191454  | 104660004 | 6 | rs9405048  | 30670292 | 10 | rs12257109  | 62184600 |
| 10 | rs10786722  | 104660068 | 6 | rs3132589  | 30672433 | 10 | rs7074460   | 62184843 |
| 10 | rs10748835  | 104660256 | 6 | rs10947087 | 30672463 | 10 | rs4948418   | 62185494 |
| 10 | rs41310292  | 104660942 | 6 | rs2269702  | 30675135 | 10 | rs10821763  | 62186118 |
| 10 | rs17884001  | 104661245 | 6 | rs6929626  | 30679333 | 10 | rs10994342  | 62187607 |
| 10 | rs1046778   | 104661484 | 6 | rs3094093  | 30679628 | 10 | rs3999537   | 62188935 |
| 10 | rs11191457  | 104661708 | 6 | rs2075015  | 30680608 | 10 | rs3999538   | 62189165 |
| 10 | rs7897654   | 104662458 | 6 | rs9262152  | 30680916 | 10 | rs77845949  | 62189495 |
| 10 | rs10883799  | 104663310 | 6 | rs6924270  | 30681980 | 10 | rs10994344  | 62189852 |
| 10 | rs56358609  | 104664289 | 6 | rs3132587  | 30685066 | 10 | rs4347329   | 62190508 |
| 10 | rs12253284  | 104665145 | 6 | rs4713354  | 30685420 | 10 | rs117467096 | 62191981 |
| 10 | rs12221193  | 104665267 | 6 | rs3132585  | 30687614 | 10 | rs4072837   | 62192060 |
| 10 | rs12261040  | 104665397 | 6 | rs3132584  | 30688427 | 10 | rs4072838   | 62192151 |
| 10 | rs77180047  | 104666757 | 6 | rs25527    | 30690938 | 10 | rs7896140   | 62192297 |
| 10 | rs4532960   | 104667406 | 6 | rs8233     | 30692965 | 10 | rs4072839   | 62192301 |
| 10 | rs10786724  | 104668942 | 6 | rs9500864  | 30693232 | 10 | rs55683151  | 62192515 |
| 10 | rs72841283  | 104669442 | 6 | rs3095330  | 30693633 | 10 | rs3935092   | 62192672 |
| 10 | rs10883800  | 104671212 | 6 | rs3095329  | 30693816 | 10 | rs12146283  | 62192746 |
| 10 | rs12251035  | 104671459 | 6 | rs3094127  | 30697447 | 10 | rs75263098  | 62193882 |
| 10 | rs75899148  | 104671966 | 6 | rs9500866  | 30697523 | 10 | rs61847579  | 62194149 |
| 10 | rs7073295   | 104672233 | 6 | rs9501028  | 30697561 | 10 | rs117015738 | 62196867 |
| 10 | rs12780220  | 104674104 | 6 | rs9501029  | 30697740 | 10 | rs12770716  | 62196872 |
| 10 | rs6584532   | 104674516 | 6 | rs1064627  | 30698541 | 10 | rs57679969  | 62197886 |
| 10 | rs192145925 | 104676954 | 6 | rs3909184  | 30699384 | 10 | rs10994349  | 62199279 |
| 10 | rs117107046 | 104676968 | 6 | rs9262155  | 30700497 | 10 | rs78554060  | 62199681 |
| 10 | rs12221064  | 104677126 | 6 | rs9968884  | 30700695 | 10 | rs10994350  | 62199825 |
| 10 | rs75650764  | 104677629 | 6 | rs2535320  | 30704986 | 10 | rs79738223  | 62200746 |
| 10 | rs74376228  | 104677662 | 6 | rs3130660  | 30706361 | 10 | rs4948420   | 62200882 |
| 10 | rs77760630  | 104677690 | 6 | rs1059612  | 30708955 | 10 | rs10821766  | 62201684 |



|    |             |           |   |            |          |    |             |          |
|----|-------------|-----------|---|------------|----------|----|-------------|----------|
| 10 | rs10883801  | 104677887 | 6 | rs3094125  | 30709357 | 10 | rs77157280  | 62202718 |
| 10 | rs2297786   | 104679978 | 6 | rs10947088 | 30709830 | 10 | rs76929953  | 62205261 |
| 10 | rs2297787   | 104680137 | 6 | rs10947089 | 30710135 | 10 | rs61847646  | 62207387 |
| 10 | rs10883802  | 104680362 | 6 | rs17719    | 30711031 | 10 | rs7922622   | 62207523 |
| 10 | rs17115213  | 104681143 | 6 | rs8512     | 30711357 | 10 | rs7070102   | 62207943 |
| 10 | rs10509758  | 104681710 | 6 | rs2301277  | 30712327 | 10 | rs117635305 | 62207984 |
| 10 | rs11191464  | 104682148 | 6 | rs3130662  | 30713808 | 10 | rs10159663  | 62208417 |
| 10 | rs10786725  | 104682357 | 6 | rs2535319  | 30714479 | 10 | rs4511241   | 62209255 |
| 10 | rs78821730  | 104684544 | 6 | rs4713358  | 30716117 | 10 | rs6479713   | 62209555 |
| 10 | rs111426607 | 104685108 | 6 | rs12210092 | 30716719 | 10 | rs75224225  | 62209646 |
| 10 | rs12411886  | 104685299 | 6 | rs9262164  | 30717389 | 10 | rs10733764  | 62210345 |
| 10 | rs17725614  | 104685493 | 6 | rs2535324  | 30718035 | 10 | rs1954117   | 62210588 |
| 10 | rs34572965  | 104685537 | 6 | rs2535323  | 30718180 | 10 | rs7089604   | 62210846 |
| 10 | rs140683362 | 104686884 | 6 | rs12202428 | 30719909 | 10 | rs3999542   | 62211158 |
| 10 | rs72841290  | 104689236 | 6 | rs28780111 | 30720311 | 10 | rs7917190   | 62211528 |
| 10 | rs10509759  | 104689665 | 6 | rs3129973  | 30721143 | 10 | rs61847647  | 62211542 |
| 10 | rs12416441  | 104689990 | 6 | rs3095328  | 30723781 | 10 | rs10821767  | 62212557 |
| 10 | rs7093461   | 104693479 | 6 | rs2394401  | 30724430 | 10 | rs7921710   | 62212664 |
| 10 | rs10748836  | 104693917 | 6 | rs3095326  | 30725841 | 10 | rs117134049 | 62212796 |
| 10 | rs17787717  | 104695699 | 6 | rs3095341  | 30726748 | 10 | rs7069341   | 62213391 |
| 10 | rs3897401   | 104696379 | 6 | rs3095340  | 30726939 | 10 | rs7087691   | 62213791 |
| 10 | rs5011520   | 104697516 | 6 | rs3869075  | 30727282 | 10 | rs56333342  | 62213967 |
| 10 | rs181339164 | 104697553 | 6 | rs3131036  | 30728290 | 10 | rs4948421   | 62213993 |
| 10 | rs12774555  | 104697707 | 6 | rs3094122  | 30728360 | 10 | rs4948260   | 62214490 |
| 10 | rs12414777  | 104697781 | 6 | rs11966040 | 30729487 | 10 | rs10994357  | 62215071 |
| 10 | rs10786727  | 104698523 | 6 | rs6926530  | 30730267 | 10 | rs77512729  | 62216092 |
| 10 | rs17787824  | 104698571 | 6 | rs3094121  | 30730960 | 10 | rs76590127  | 62216935 |
| 10 | rs4919694   | 104698978 | 6 | rs9262176  | 30731330 | 10 | rs79911589  | 62217219 |
| 10 | rs77059182  | 104701251 | 6 | rs13214831 | 30731505 | 10 | rs75273753  | 62217235 |
| 10 | rs72841298  | 104701872 | 6 | rs3094120  | 30731556 | 10 | rs10047260  | 62217805 |
| 10 | rs77273695  | 104704530 | 6 | rs3129975  | 30732054 | 10 | rs10821768  | 62218305 |
| 10 | rs111973848 | 104704736 | 6 | rs13204228 | 30734255 | 10 | rs10740028  | 62219990 |
| 10 | rs61870830  | 104704762 | 6 | rs12210947 | 30735105 | 10 | rs1934750   | 62220244 |
| 10 | rs3897402   | 104705412 | 6 | rs11963870 | 30735229 | 10 | rs10994359  | 62222107 |
| 10 | rs10786728  | 104705706 | 6 | rs12526186 | 30736151 | 10 | rs12761294  | 62222236 |
| 10 | rs10883804  | 104706520 | 6 | rs3094117  | 30737486 | 10 | rs10761503  | 62222414 |
| 10 | rs11191472  | 104707016 | 6 | rs9262182  | 30738042 | 10 | rs75803729  | 62222908 |
| 10 | rs78602818  | 104708030 | 6 | rs3094116  | 30738408 | 10 | rs4426089   | 62223112 |
| 10 | rs10883805  | 104708251 | 6 | rs3095336  | 30738446 | 10 | rs79082892  | 62223225 |
| 10 | rs12783467  | 104708312 | 6 | rs6911628  | 30739846 | 10 | rs4948422   | 62223362 |
| 10 | rs11191473  | 104710710 | 6 | rs6912077  | 30739904 | 10 | rs117099644 | 62223852 |
| 10 | rs72847279  | 104717669 | 6 | rs3130666  | 30740160 | 10 | rs12243786  | 62223944 |
| 10 | rs12413409  | 104719096 | 6 | rs16897888 | 30740515 | 10 | rs7096617   | 62224554 |
| 10 | rs76892505  | 104719290 | 6 | rs4248148  | 30742134 | 10 | rs117388564 | 62224744 |
| 10 | rs10883808  | 104721126 | 6 | rs17481190 | 30743014 | 10 | rs114593644 | 62225456 |
| 10 | rs78260931  | 104721962 | 6 | rs3130667  | 30743241 | 10 | rs4948261   | 62225539 |
| 10 | rs7089061   | 104723015 | 6 | rs11757629 | 30744529 | 10 | rs10994362  | 62225792 |
| 10 | rs7073179   | 104723091 | 6 | rs3130673  | 30746519 | 10 | rs1890927   | 62226261 |

|    |            |           |   |            |          |    |             |          |
|----|------------|-----------|---|------------|----------|----|-------------|----------|
| 10 | rs11191479 | 104723620 | 6 | rs12526481 | 30746633 | 10 | rs10761504  | 62226848 |
| 10 | rs75014273 | 104724573 | 6 | rs9468829  | 30749233 | 10 | rs1572843   | 62226980 |
| 10 | rs12778673 | 104725170 | 6 | rs9468830  | 30749712 | 10 | rs1572842   | 62227395 |
| 10 | rs72847281 | 104725471 | 6 | rs7752959  | 30750682 | 10 | rs72807911  | 62228288 |
| 10 | rs10883810 | 104727224 | 6 | rs9295912  | 30752184 | 10 | rs10994364  | 62228327 |
| 10 | rs7899622  | 104727333 | 6 | rs4713360  | 30753146 | 10 | rs10994365  | 62228499 |
| 10 | rs2065977  | 104729415 | 6 | rs13212094 | 30753455 | 10 | rs10994366  | 62229789 |
| 10 | rs11191485 | 104729816 | 6 | rs12527415 | 30754540 | 10 | rs143476356 | 62230224 |
| 10 | rs74749600 | 104732996 | 6 | rs13213720 | 30755320 | 10 | rs4466779   | 62230864 |
| 10 | rs1538204  | 104733893 | 6 | rs28780116 | 30755668 | 10 | rs10994367  | 62231295 |
| 10 | rs11191487 | 104734623 | 6 | rs16897899 | 30755744 | 10 | rs77897278  | 62233139 |
| 10 | rs12248123 | 104735366 | 6 | rs28780119 | 30755863 | 10 | rs117219308 | 62233407 |
| 10 | rs7096452  | 104736563 | 6 | rs16897900 | 30755893 | 10 | rs79716236  | 62233491 |
| 10 | rs7080462  | 104736699 | 6 | rs13201769 | 30756066 | 10 | rs1938534   | 62234012 |
| 10 | rs7096269  | 104736721 | 6 | rs13201901 | 30756140 | 10 | rs185126186 | 62234070 |
| 10 | rs72847291 | 104736855 | 6 | rs4713365  | 30756183 | 10 | rs1938533   | 62234109 |
| 10 | rs12268849 | 104737682 | 6 | rs4713366  | 30756361 | 10 | rs17810349  | 62235173 |
| 10 | rs10883815 | 104739179 | 6 | rs6920124  | 30756593 | 10 | rs7089985   | 62235234 |
| 10 | rs11191489 | 104740568 | 6 | rs6900029  | 30756596 | 10 | rs7090243   | 62235443 |
| 10 | rs12260436 | 104741114 | 6 | rs6920649  | 30756883 | 10 | rs10733765  | 62237399 |
| 10 | rs55833108 | 104741583 | 6 | rs10947095 | 30757575 | 10 | rs10994369  | 62237531 |
| 10 | rs11191490 | 104745174 | 6 | rs3131043  | 30758466 | 10 | rs10821769  | 62237835 |
| 10 | rs3902934  | 104746649 | 6 | rs17189441 | 30758555 | 10 | rs17236977  | 62237923 |
| 10 | rs11191491 | 104747373 | 6 | rs3129981  | 30758857 | 10 | rs12356018  | 62238682 |
| 10 | rs11191492 | 104747534 | 6 | rs3131050  | 30760025 | 10 | rs10740029  | 62238902 |
| 10 | rs75219158 | 104747594 | 6 | rs3131051  | 30760181 | 10 | rs116934723 | 62239498 |
| 10 | rs1890184  | 104748459 | 6 | rs7740525  | 30760698 | 10 | rs7067886   | 62239503 |
| 10 | rs1890185  | 104748718 | 6 | rs3094112  | 30761734 | 10 | rs7912663   | 62240587 |
| 10 | rs75810873 | 104751570 | 6 | rs3129985  | 30762542 | 10 | rs11816019  | 62240823 |
| 10 | rs10786731 | 104751781 | 6 | rs3131060  | 30763291 | 10 | rs12356634  | 62241548 |
| 10 | rs10509757 | 104752960 | 6 | rs3129986  | 30763562 | 10 | rs12771347  | 62241727 |
| 10 | rs12569364 | 104753507 | 6 | rs6930444  | 30763632 | 10 | rs12770054  | 62241757 |
| 10 | rs11191494 | 104753675 | 6 | rs3131061  | 30763656 | 10 | rs10761505  | 62242145 |
| 10 | rs61870841 | 104754813 | 6 | rs3131063  | 30763756 | 10 | rs72807927  | 62243039 |
| 10 | rs10883817 | 104755431 | 6 | rs3131064  | 30763893 | 10 | rs7910492   | 62243104 |
| 10 | rs7894588  | 104756030 | 6 | rs3130641  | 30764081 | 10 | rs10994371  | 62243199 |
| 10 | rs7894959  | 104756182 | 6 | rs12660860 | 30764241 | 10 | rs10761507  | 62243232 |
| 10 | rs7898770  | 104756636 | 6 | rs12660883 | 30764420 | 10 | rs10994372  | 62243551 |
| 10 | rs12764154 | 104757709 | 6 | rs28670020 | 30764838 | 10 | rs17816232  | 62243554 |
| 10 | rs35791366 | 104757753 | 6 | rs1264377  | 30764907 | 10 | rs17237427  | 62243649 |
| 10 | rs7908450  | 104759191 | 6 | rs1264376  | 30765579 | 10 | rs74946632  | 62243711 |
| 10 | rs10883818 | 104759586 | 6 | rs10947096 | 30765895 | 10 | rs12764668  | 62243866 |
| 10 | rs78358813 | 104760980 | 6 | rs12190167 | 30766194 | 10 | rs12764533  | 62243916 |
| 10 | rs12779991 | 104761930 | 6 | rs3129987  | 30766204 | 10 | rs12764726  | 62243997 |
| 10 | rs10786732 | 104762535 | 6 | rs12197154 | 30766244 | 10 | rs7898622   | 62244379 |
| 10 | rs10883819 | 104763308 | 6 | rs6905957  | 30766740 | 10 | rs78929840  | 62244738 |
| 10 | rs34060850 | 104764065 | 6 | rs4639381  | 30766765 | 10 | rs10994375  | 62245124 |
| 10 | rs77426338 | 104764148 | 6 | rs4587208  | 30767013 | 10 | rs12356720  | 62245219 |

|    |             |           |   |            |          |    |             |          |
|----|-------------|-----------|---|------------|----------|----|-------------|----------|
| 10 | rs11191499  | 104764271 | 6 | rs4248149  | 30767627 | 10 | rs118052890 | 62245593 |
| 10 | rs10883820  | 104764661 | 6 | rs2394403  | 30767869 | 10 | rs11596715  | 62245834 |
| 10 | rs67908413  | 104764989 | 6 | rs4573120  | 30767947 | 10 | rs11597195  | 62245963 |
| 10 | rs11191502  | 104765494 | 6 | rs4711232  | 30768412 | 10 | rs10994376  | 62245981 |
| 10 | rs12258551  | 104767892 | 6 | rs4711233  | 30768426 | 10 | rs111754174 | 62246400 |
| 10 | rs11191506  | 104768634 | 6 | rs4711235  | 30768636 | 10 | rs144479748 | 62246568 |
| 10 | rs7100592   | 104769098 | 6 | rs9366759  | 30768955 | 10 | rs10761508  | 62246634 |
| 10 | rs11191511  | 104769709 | 6 | rs1264373  | 30769273 | 10 | rs78559636  | 62246834 |
| 10 | rs6584536   | 104770702 | 6 | rs3129988  | 30769478 | 10 | rs10761509  | 62247057 |
| 10 | rs111326718 | 104771211 | 6 | rs1264372  | 30769726 | 10 | rs7911959   | 62247330 |
| 10 | rs7071373   | 104771922 | 6 | rs13198118 | 30770732 | 10 | rs1938530   | 62247877 |
| 10 | rs11191512  | 104772699 | 6 | rs4713372  | 30770778 | 10 | rs56164449  | 62247878 |
| 10 | rs11191513  | 104772984 | 6 | rs9380192  | 30772344 | 10 | rs1938529   | 62247952 |
| 10 | rs11191514  | 104773364 | 6 | rs3094123  | 30772378 | 10 | rs11812654  | 62247963 |
| 10 | rs12245343  | 104774050 | 6 | rs4711240  | 30773239 | 10 | rs1938528   | 62248141 |
| 10 | rs7914558   | 104775908 | 6 | rs4713376  | 30773314 | 10 | rs117193770 | 62248749 |
| 10 | rs77787671  | 104776205 | 6 | rs13191728 | 30773349 | 10 | rs11813629  | 62249495 |
| 10 | rs10509763  | 104776391 | 6 | rs3130783  | 30774357 | 10 | rs10994378  | 62249501 |
| 10 | rs10509764  | 104776475 | 6 | rs9378109  | 30774474 | 10 | rs76446519  | 62249556 |
| 10 | rs11191515  | 104776527 | 6 | rs1264362  | 30776590 | 10 | rs11813688  | 62249777 |
| 10 | rs6584537   | 104778267 | 6 | rs12200562 | 30776621 | 10 | rs73257065  | 62250087 |
| 10 | rs58289149  | 104780552 | 6 | rs1264361  | 30777498 | 10 | rs117512390 | 62250178 |
| 10 | rs78193706  | 104780564 | 6 | rs9380197  | 30778203 | 10 | rs73257066  | 62250285 |
| 10 | rs72850111  | 104780879 | 6 | rs9391696  | 30778786 | 10 | rs73257067  | 62250485 |
| 10 | rs72850112  | 104781301 | 6 | rs4327730  | 30780936 | 10 | rs117884097 | 62250522 |
| 10 | rs72850116  | 104783829 | 6 | rs886425   | 30781301 | 10 | rs73257068  | 62250796 |
| 10 | rs4917991   | 104783833 | 6 | rs4286818  | 30781923 | 10 | rs10821775  | 62250855 |
| 10 | rs1538205   | 104784794 | 6 | rs886424   | 30782002 | 10 | rs77430401  | 62250910 |
| 10 | rs79227132  | 104785737 | 6 | rs2894046  | 30782105 | 10 | rs76762467  | 62250984 |
| 10 | rs12246739  | 104787019 | 6 | rs886423   | 30782205 | 10 | rs73257069  | 62251035 |
| 10 | rs7087459   | 104790999 | 6 | rs2394412  | 30782235 | 10 | rs75827784  | 62251144 |
| 10 | rs111990095 | 104791595 | 6 | rs2394413  | 30782303 | 10 | rs12256942  | 62251288 |
| 10 | rs12779535  | 104791760 | 6 | rs2394414  | 30782323 | 10 | rs10994383  | 62251553 |
| 10 | rs72850120  | 104791837 | 6 | rs9295924  | 30782361 | 10 | rs73257077  | 62252109 |
| 10 | rs11191523  | 104792400 | 6 | rs2894047  | 30782407 | 10 | rs72406472  | 62252495 |
| 10 | rs117521106 | 104792461 | 6 | rs4713380  | 30785273 | 10 | rs11813678  | 62252913 |
| 10 | rs7088200   | 104793235 | 6 | rs9380198  | 30785886 | 10 | rs17816562  | 62252985 |
| 10 | rs11191525  | 104793435 | 6 | rs9348843  | 30786676 | 10 | rs67801419  | 62253125 |
| 10 | rs75970938  | 104793648 | 6 | rs4713382  | 30787175 | 10 | rs10994384  | 62253302 |
| 10 | rs72850123  | 104793992 | 6 | rs4713383  | 30787241 | 10 | rs12246785  | 62253572 |
| 10 | rs10786733  | 104794947 | 6 | rs4713385  | 30787593 | 10 | rs12246745  | 62253685 |
| 10 | rs11191527  | 104795134 | 6 | rs1264353  | 30787762 | 10 | rs12763531  | 62254088 |
| 10 | rs7920868   | 104795409 | 6 | rs3094111  | 30788191 | 10 | rs7897838   | 62254337 |
| 10 | rs4633383   | 104795723 | 6 | rs16897919 | 30788588 | 10 | rs7897863   | 62254477 |
| 10 | rs78893207  | 104796138 | 6 | rs1264352  | 30789647 | 10 | rs77724535  | 62254580 |
| 10 | rs12415388  | 104796345 | 6 | rs12195508 | 30789665 | 10 | rs7898141   | 62254680 |
| 10 | rs10883822  | 104796652 | 6 | rs9262216  | 30789694 | 10 | rs11816666  | 62254898 |
| 10 | rs10218853  | 104796787 | 6 | rs4713389  | 30790604 | 10 | rs56122661  | 62255223 |

|    |             |           |   |            |          |    |             |          |
|----|-------------|-----------|---|------------|----------|----|-------------|----------|
| 10 | rs76099321  | 104797283 | 6 | rs6901761  | 30790798 | 10 | rs7077572   | 62255455 |
| 10 | rs7073323   | 104797423 | 6 | rs12203797 | 30790807 | 10 | rs58354369  | 62255751 |
| 10 | rs58317752  | 104799267 | 6 | rs4713390  | 30791971 | 10 | rs1938536   | 62256285 |
| 10 | rs11191530  | 104800044 | 6 | rs4713391  | 30792235 | 10 | rs2211656   | 62256593 |
| 10 | rs56376544  | 104800099 | 6 | rs12192704 | 30792270 | 10 | rs1934760   | 62256745 |
| 10 | rs58700372  | 104800205 | 6 | rs12206022 | 30792364 | 10 | rs7915051   | 62257915 |
| 10 | rs7092097   | 104801087 | 6 | rs12192828 | 30792492 | 10 | rs6479714   | 62258616 |
| 10 | rs12255761  | 104801866 | 6 | rs9394020  | 30792698 | 10 | rs2893837   | 62259143 |
| 10 | rs7089680   | 104802071 | 6 | rs7751869  | 30793314 | 10 | rs2393638   | 62259224 |
| 10 | rs12257935  | 104803062 | 6 | rs12212837 | 30793667 | 10 | rs10821776  | 62260101 |
| 10 | rs116954400 | 104806770 | 6 | rs915664   | 30794617 | 10 | rs10994386  | 62260544 |
| 10 | rs12266291  | 104806884 | 6 | rs3888583  | 30795008 | 10 | rs75377991  | 62261535 |
| 10 | rs12241091  | 104808997 | 6 | rs7772131  | 30795171 | 10 | rs143747491 | 62261782 |
| 10 | rs12219027  | 104811203 | 6 | rs3130784  | 30796106 | 10 | rs55672059  | 62262242 |
| 10 | rs4917994   | 104811699 | 6 | rs9380199  | 30796271 | 10 | rs17816795  | 62263522 |
| 10 | rs118031532 | 104812799 | 6 | rs1264350  | 30796545 | 10 | rs10509134  | 62266146 |
| 10 | rs72850132  | 104812861 | 6 | rs12198723 | 30796734 | 10 | rs10821778  | 62266408 |
| 10 | rs10883824  | 104812897 | 6 | rs3130785  | 30796738 | 10 | rs10430492  | 62267108 |
| 10 | rs2275271   | 104814162 | 6 | rs12198842 | 30796932 | 10 | rs80143165  | 62268958 |
| 10 | rs7916476   | 104815268 | 6 | rs9368644  | 30797083 | 10 | rs117641222 | 62269394 |
| 10 | rs12769080  | 104815345 | 6 | rs9262218  | 30797215 | 10 | rs2153525   | 62269574 |
| 10 | rs11191535  | 104815876 | 6 | rs7749924  | 30797991 | 10 | rs17816915  | 62269683 |
| 10 | rs41287478  | 104816469 | 6 | rs3094110  | 30799043 | 10 | rs10761510  | 62270037 |
| 10 | rs7908280   | 104816947 | 6 | rs3130647  | 30799072 | 10 | rs2211220   | 62271491 |
| 10 | rs79205575  | 104817383 | 6 | rs3130648  | 30800326 | 10 | rs1954656   | 62272646 |
| 10 | rs11191537  | 104817709 | 6 | rs1264344  | 30800577 | 10 | rs10994393  | 62273627 |
| 10 | rs185913447 | 104818716 | 6 | rs1264341  | 30802465 | 10 | rs79195719  | 62274173 |
| 10 | rs12415468  | 104821191 | 6 | rs3095352  | 30805921 | 10 | rs10821779  | 62274525 |
| 10 | rs17727044  | 104821256 | 6 | rs11757306 | 30807058 | 10 | rs9633553   | 62274737 |
| 10 | rs117460856 | 104821768 | 6 | rs3130786  | 30807948 | 10 | rs10994394  | 62275329 |
| 10 | rs12780116  | 104821946 | 6 | rs2517582  | 30808762 | 10 | rs10821781  | 62275515 |
| 10 | rs77827514  | 104822009 | 6 | rs3130787  | 30809864 | 10 | rs10821782  | 62275564 |
| 10 | rs80200167  | 104822262 | 6 | rs2517580  | 30810056 | 10 | rs10994395  | 62275861 |
| 10 | rs1572578   | 104822431 | 6 | rs2535336  | 30810654 | 10 | rs10761514  | 62276317 |
| 10 | rs78214351  | 104822688 | 6 | rs2535335  | 30812497 | 10 | rs12413264  | 62276548 |
| 10 | rs11191540  | 104822809 | 6 | rs2535332  | 30813249 | 10 | rs12411842  | 62276713 |
| 10 | rs72843968  | 104823674 | 6 | rs2517576  | 30815035 | 10 | rs10994396  | 62276720 |
| 10 | rs7092029   | 104823909 | 6 | rs2844664  | 30815945 | 10 | rs10821785  | 62277121 |
| 10 | rs184284297 | 104824154 | 6 | rs2844663  | 30815951 | 10 | rs10821786  | 62277344 |
| 10 | rs11191542  | 104824324 | 6 | rs2535331  | 30816270 | 10 | rs10821787  | 62277622 |
| 10 | rs943039    | 104825132 | 6 | rs3132578  | 30816865 | 10 | rs7098650   | 62277679 |
| 10 | rs17115414  | 104825152 | 6 | rs2394450  | 30817501 | 10 | rs10821788  | 62277739 |
| 10 | rs12358887  | 104825578 | 6 | rs3095350  | 30817866 | 10 | rs1417330   | 62278391 |
| 10 | rs3781285   | 104825665 | 6 | rs2844662  | 30817879 | 10 | rs2153522   | 62278812 |
| 10 | rs74468868  | 104825846 | 6 | rs2250264  | 30821187 | 10 | rs12146207  | 62278842 |
| 10 | rs943038    | 104826261 | 6 | rs3095345  | 30822413 | 10 | rs10994397  | 62279124 |
| 10 | rs117908909 | 104826820 | 6 | rs3130653  | 30822771 | 10 | rs1340586   | 62279594 |
| 10 | rs1926034   | 104829102 | 6 | rs3130654  | 30823075 | 10 | rs2393640   | 62279776 |

|    |             |           |   |            |          |    |             |          |
|----|-------------|-----------|---|------------|----------|----|-------------|----------|
| 10 | rs1926032   | 104829469 | 6 | rs3916232  | 30823366 | 10 | rs2393641   | 62279827 |
| 10 | rs11191545  | 104829793 | 6 | rs9295928  | 30823630 | 10 | rs2105463   | 62280080 |
| 10 | rs7910900   | 104829898 | 6 | rs3130655  | 30823710 | 10 | rs12269538  | 62280236 |
| 10 | rs12570528  | 104830210 | 6 | rs2844660  | 30823760 | 10 | rs4948423   | 62280457 |
| 10 | rs10883826  | 104830819 | 6 | rs2844659  | 30824532 | 10 | rs10994398  | 62281234 |
| 10 | rs72843974  | 104832857 | 6 | rs3095344  | 30824649 | 10 | rs883591    | 62281392 |
| 10 | rs3781283   | 104833048 | 6 | rs7772269  | 30825220 | 10 | rs6479715   | 62281464 |
| 10 | rs12770390  | 104833074 | 6 | rs9468841  | 30825287 | 10 | rs79190732  | 62282199 |
| 10 | rs12257941  | 104833161 | 6 | rs2844657  | 30829522 | 10 | rs2393642   | 62282490 |
| 10 | rs118003084 | 104833686 | 6 | rs7761138  | 30830292 | 10 | rs2393643   | 62282567 |
| 10 | rs72843977  | 104834237 | 6 | rs3130791  | 30831843 | 10 | rs12412135  | 62282834 |
| 10 | rs17115419  | 104834876 | 6 | rs2535326  | 30832063 | 10 | rs10821789  | 62285338 |
| 10 | rs943037    | 104835919 | 6 | rs3130794  | 30832810 | 10 | rs7906431   | 62286187 |
| 10 | rs943036    | 104836047 | 6 | rs3132576  | 30833116 | 10 | rs7906549   | 62286276 |
| 10 | rs17727391  | 104836101 | 6 | rs9262263  | 30833957 | 10 | rs77097330  | 62286613 |
| 10 | rs2296569   | 104836511 | 6 | rs3095354  | 30836111 | 10 | rs7906760   | 62286653 |
| 10 | rs35647154  | 104836853 | 6 | rs10947109 | 30836225 | 10 | rs1938542   | 62286773 |
| 10 | rs2296568   | 104836940 | 6 | rs3130657  | 30837646 | 10 | rs77967847  | 62287200 |
| 10 | rs1046411   | 104837816 | 6 | rs2535340  | 30838497 | 10 | rs12766956  | 62288351 |
| 10 | rs943035    | 104839152 | 6 | rs2844654  | 30838688 | 10 | rs10821790  | 62288767 |
| 10 | rs72843983  | 104839230 | 6 | rs2535339  | 30839430 | 10 | rs1934754   | 62289270 |
| 10 | rs7901197   | 104840433 | 6 | rs3130795  | 30839629 | 10 | rs1934755   | 62289275 |
| 10 | rs10883829  | 104840635 | 6 | rs3132573  | 30840688 | 10 | rs10761515  | 62289800 |
| 10 | rs12219901  | 104840967 | 6 | rs3130796  | 30840950 | 10 | rs1890926   | 62290105 |
| 10 | rs10458729  | 104841479 | 6 | rs7746003  | 30842894 | 10 | rs72820991  | 62290805 |
| 10 | rs763914    | 104841587 | 6 | rs1264334  | 30844260 | 10 | rs76204536  | 62291050 |
| 10 | rs726010    | 104841977 | 6 | rs1264333  | 30844314 | 10 | rs10994406  | 62291122 |
| 10 | rs78414630  | 104842172 | 6 | rs1264332  | 30845563 | 10 | rs10761516  | 62291629 |
| 10 | rs11191547  | 104843148 | 6 | rs1264331  | 30846830 | 10 | rs10740030  | 62291812 |
| 10 | rs12785223  | 104844011 | 6 | rs7756521  | 30848253 | 10 | rs1938541   | 62292032 |
| 10 | rs117639302 | 104844149 | 6 | rs9295930  | 30849822 | 10 | rs112922975 | 62292553 |
| 10 | rs76325870  | 104844314 | 6 | rs9501032  | 30850191 | 10 | rs1892547   | 62292958 |
| 10 | rs7092200   | 104844872 | 6 | rs1264327  | 30850582 | 10 | rs1892546   | 62294016 |
| 10 | rs58279999  | 104844876 | 6 | rs1264326  | 30851909 | 10 | rs17817819  | 62294097 |
| 10 | rs7074395   | 104844928 | 6 | rs9468842  | 30852747 | 10 | rs1574466   | 62294392 |
| 10 | rs17727686  | 104845226 | 6 | rs1264324  | 30855211 | 10 | rs1938540   | 62294814 |
| 10 | rs4917995   | 104845443 | 6 | rs4618569  | 30855251 | 10 | rs117350820 | 62295086 |
| 10 | rs11191548  | 104846178 | 6 | rs1264323  | 30855907 | 10 | rs10821791  | 62296190 |
| 10 | rs184517520 | 104846224 | 6 | rs2229933  | 30857072 | 10 | rs75779710  | 62297222 |
| 10 | rs72843990  | 104846312 | 6 | rs6457281  | 30857795 | 10 | rs16915102  | 62298123 |
| 10 | rs11191549  | 104846797 | 6 | rs1264322  | 30857894 | 10 | rs1938539   | 62298142 |
| 10 | rs74233806  | 104846891 | 6 | rs7743661  | 30858254 | 10 | rs1938538   | 62298233 |
| 10 | rs8139      | 104848123 | 6 | rs1049622  | 30858857 | 10 | rs7080540   | 62298586 |
| 10 | rs10430665  | 104848430 | 6 | rs3132572  | 30861729 | 10 | rs10821792  | 62298616 |
| 10 | rs12573199  | 104848844 | 6 | rs1264318  | 30863530 | 10 | rs7917458   | 62299408 |
| 10 | rs12573200  | 104848855 | 6 | rs886422   | 30864279 | 10 | rs1938526   | 62300383 |
| 10 | rs10786736  | 104849116 | 6 | rs1049623  | 30864829 | 10 | rs11813412  | 62300751 |
| 10 | rs12573221  | 104849144 | 6 | rs2239517  | 30865115 | 10 | rs11817221  | 62300818 |

|    |             |           |   |           |          |    |             |          |
|----|-------------|-----------|---|-----------|----------|----|-------------|----------|
| 10 | rs3740387   | 104849468 | 6 | rs2267641 | 30865204 | 10 | rs1938525   | 62300929 |
| 10 | rs3736922   | 104850632 | 6 | rs2239518 | 30865725 | 10 | rs7074073   | 62302218 |
| 10 | rs11191551  | 104850835 | 6 | rs1049628 | 30867106 | 10 | rs78058783  | 62302479 |
| 10 | rs10883830  | 104851285 | 6 | rs8408    | 30867666 | 10 | rs6479716   | 62302558 |
| 10 | rs17094683  | 104851301 | 6 | rs9468843 | 30867958 | 10 | rs10994408  | 62302809 |
| 10 | rs11191553  | 104851396 | 6 | rs2894055 | 30868628 | 10 | rs10761517  | 62302991 |
| 10 | rs12217501  | 104851889 | 6 | rs9468845 | 30869593 | 10 | rs79306853  | 62303175 |
| 10 | rs12220743  | 104851912 | 6 | rs3869086 | 30870168 | 10 | rs1938524   | 62303573 |
| 10 | rs56036640  | 104852002 | 6 | rs9468846 | 30870763 | 10 | rs10821793  | 62303835 |
| 10 | rs111842178 | 104852121 | 6 | rs2894054 | 30872274 | 10 | rs17239789  | 62303898 |
| 10 | rs12355120  | 104852166 | 6 | rs1264312 | 30872982 | 10 | rs80214098  | 62304474 |
| 10 | rs3781282   | 104852419 | 6 | rs3909130 | 30874165 | 10 | rs10994411  | 62304808 |
| 10 | rs3781281   | 104852648 | 6 | rs3130780 | 30874308 | 10 | rs2186251   | 62304870 |
| 10 | rs138626837 | 104852659 | 6 | rs2284175 | 30875145 | 10 | rs7072878   | 62305640 |
| 10 | rs72843997  | 104853290 | 6 | rs2284176 | 30875622 | 10 | rs61855348  | 62307478 |
| 10 | rs2274340   | 104853577 | 6 | rs1264309 | 30875899 | 10 | rs76847929  | 62307850 |
| 10 | rs72843998  | 104855261 | 6 | rs2074510 | 30876034 | 10 | rs10761518  | 62307921 |
| 10 | rs11191554  | 104855278 | 6 | rs2074508 | 30876438 | 10 | rs10821795  | 62308519 |
| 10 | rs1926030   | 104855656 | 6 | rs1362123 | 30876996 | 10 | rs4540900   | 62308734 |
| 10 | rs1926029   | 104855670 | 6 | rs916920  | 30877202 | 10 | rs79994045  | 62311027 |
| 10 | rs12412038  | 104856162 | 6 | rs3218814 | 30878579 | 10 | rs2893839   | 62311190 |
| 10 | rs184992072 | 104856766 | 6 | rs2074512 | 30878919 | 10 | rs2393644   | 62311274 |
| 10 | rs187747996 | 104857206 | 6 | rs886420  | 30879636 | 10 | rs117897830 | 62311739 |
| 10 | rs10786737  | 104857218 | 6 | rs1264308 | 30879987 | 10 | rs72822817  | 62311744 |
| 10 | rs10883831  | 104857234 | 6 | rs3218822 | 30880336 | 10 | rs1892545   | 62312449 |
| 10 | rs11191555  | 104857523 | 6 | rs1264307 | 30880757 | 10 | rs1938523   | 62312500 |
| 10 | rs11191556  | 104858144 | 6 | rs1264305 | 30882277 | 10 | rs72822818  | 62312932 |
| 10 | rs2274339   | 104860053 | 6 | rs1264304 | 30882415 | 10 | rs10761519  | 62313113 |
| 10 | rs41287482  | 104860933 | 6 | rs1264303 | 30882513 | 10 | rs7101298   | 62313176 |
| 10 | rs72844002  | 104861736 | 6 | rs1264302 | 30882634 | 10 | rs7085315   | 62313241 |
| 10 | rs11191557  | 104864614 | 6 | rs6926224 | 30882689 | 10 | rs79479106  | 62313349 |
| 10 | rs11191558  | 104864678 | 6 | rs1264301 | 30882781 | 10 | rs10740031  | 62313808 |
| 10 | rs2281877   | 104866062 | 6 | rs6926723 | 30882803 | 10 | rs2893840   | 62314015 |
| 10 | rs80122405  | 104866815 | 6 | rs1264300 | 30882856 | 10 | rs75700446  | 62314538 |
| 10 | rs7896519   | 104866863 | 6 | rs1264299 | 30883920 | 10 | rs76349630  | 62315425 |
| 10 | rs7896547   | 104866958 | 6 | rs1264298 | 30884436 | 10 | rs1938546   | 62315986 |
| 10 | rs11191560  | 104869038 | 6 | rs1264297 | 30884806 | 10 | rs2154392   | 62317486 |
| 10 | rs10786738  | 104869451 | 6 | rs9262289 | 30885686 | 10 | rs7088259   | 62318852 |
| 10 | rs12413046  | 104871204 | 6 | rs9262290 | 30885821 | 10 | rs7070867   | 62319277 |
| 10 | rs10883832  | 104871279 | 6 | rs9262293 | 30886350 | 10 | rs6479717   | 62319288 |
| 10 | rs2066323   | 104871361 | 6 | rs7756286 | 30887311 | 10 | rs2393646   | 62319434 |
| 10 | rs7899084   | 104872547 | 6 | rs7738138 | 30887344 | 10 | rs2068043   | 62320330 |
| 10 | rs9633712   | 104873761 | 6 | rs2285319 | 30887972 | 10 | rs117685611 | 62320623 |
| 10 | rs7908960   | 104875304 | 6 | rs2249464 | 30888161 | 10 | rs1975443   | 62321342 |
| 10 | rs1935323   | 104877035 | 6 | rs7766094 | 30888617 | 10 | rs10994415  | 62322034 |
| 10 | rs183804001 | 104877408 | 6 | rs2517467 | 30889260 | 10 | rs10740032  | 62322385 |
| 10 | rs1926037   | 104878010 | 6 | rs2074511 | 30889389 | 10 | rs958852    | 62322618 |
| 10 | rs11191564  | 104878543 | 6 | rs2517466 | 30890055 | 10 | rs723011    | 62322849 |

|    |             |           |   |            |          |    |             |          |
|----|-------------|-----------|---|------------|----------|----|-------------|----------|
| 10 | rs6584539   | 104879402 | 6 | rs885905   | 30890431 | 10 | rs1442552   | 62323229 |
| 10 | rs10748837  | 104880236 | 6 | rs2074506  | 30890483 | 10 | rs7914139   | 62323419 |
| 10 | rs75221325  | 104880773 | 6 | rs753725   | 30890871 | 10 | rs1822261   | 62323611 |
| 10 | rs10883834  | 104881402 | 6 | rs2252760  | 30892377 | 10 | rs1442551   | 62324491 |
| 10 | rs79331374  | 104882913 | 6 | rs2532941  | 30892521 | 10 | rs10509133  | 62324528 |
| 10 | rs1060240   | 104883337 | 6 | rs2252856  | 30893251 | 10 | rs10509132  | 62325665 |
| 10 | rs7067663   | 104883650 | 6 | rs1043483  | 30893728 | 10 | rs1938537   | 62326370 |
| 10 | rs10883835  | 104884208 | 6 | rs2532938  | 30893831 | 10 | rs2154393   | 62326687 |
| 10 | rs1541213   | 104885330 | 6 | rs4678     | 30893941 | 10 | rs74318560  | 62330507 |
| 10 | rs11191568  | 104886374 | 6 | rs2532936  | 30894408 | 10 | rs17818833  | 62330759 |
| 10 | rs12779263  | 104886533 | 6 | rs2532935  | 30894573 | 10 | rs7895202   | 62331684 |
| 10 | rs10883836  | 104891198 | 6 | rs2532934  | 30894759 | 10 | rs6479718   | 62331983 |
| 10 | rs34104646  | 104896078 | 6 | rs4711247  | 30895680 | 10 | rs7903279   | 62333324 |
| 10 | rs72844301  | 104896100 | 6 | rs3873332  | 30895990 | 10 | rs1442547   | 62333559 |
| 10 | rs72846103  | 104896751 | 6 | rs3873334  | 30896147 | 10 | rs74659950  | 62333617 |
| 10 | rs11191573  | 104896816 | 6 | rs2517462  | 30896190 | 10 | rs7924098   | 62334197 |
| 10 | rs746293    | 104897254 | 6 | rs2517459  | 30897022 | 10 | rs1442549   | 62334300 |
| 10 | rs732998    | 104897901 | 6 | rs2532929  | 30897774 | 10 | rs1442550   | 62334468 |
| 10 | rs11598702  | 104897985 | 6 | rs2532927  | 30898434 | 10 | rs77736959  | 62335061 |
| 10 | rs11191575  | 104898337 | 6 | rs2532925  | 30899163 | 10 | rs7081442   | 62336956 |
| 10 | rs116976910 | 104898422 | 6 | rs3095153  | 30899195 | 10 | rs7081445   | 62336970 |
| 10 | rs12262258  | 104900272 | 6 | rs4713402  | 30899233 | 10 | rs75849617  | 62337474 |
| 10 | rs78436955  | 104900841 | 6 | rs2253588  | 30899377 | 10 | rs78424567  | 62337884 |
| 10 | rs79993475  | 104901031 | 6 | rs3131787  | 30899524 | 10 | rs7906410   | 62339285 |
| 10 | rs12220375  | 104901491 | 6 | rs2286656  | 30899571 | 10 | rs7906839   | 62339656 |
| 10 | rs11191577  | 104902165 | 6 | rs2286655  | 30899746 | 10 | rs2393671   | 62340712 |
| 10 | rs7912517   | 104905529 | 6 | rs2253705  | 30900094 | 10 | rs2393672   | 62340856 |
| 10 | rs11191580  | 104906211 | 6 | rs3095151  | 30900150 | 10 | rs4948262   | 62342037 |
| 10 | rs12243903  | 104906992 | 6 | rs12525616 | 30900435 | 10 | rs1938527   | 62342519 |
| 10 | rs2066322   | 104909339 | 6 | rs2844651  | 30900664 | 10 | rs9731224   | 62343148 |
| 10 | rs1163249   | 104909890 | 6 | rs7764239  | 30900919 | 10 | rs10821797  | 62344699 |
| 10 | rs12775302  | 104911356 | 6 | rs10947113 | 30902009 | 10 | rs7072678   | 62344769 |
| 10 | rs11191582  | 104913653 | 6 | rs2844650  | 30902533 | 10 | rs12414575  | 62344939 |
| 10 | rs7067970   | 104913870 | 6 | rs3131784  | 30903948 | 10 | rs16915156  | 62345073 |
| 10 | rs74233809  | 104913940 | 6 | rs12697941 | 30904714 | 10 | rs10994420  | 62345803 |
| 10 | rs2148198   | 104915310 | 6 | rs3132571  | 30905313 | 10 | rs4357640   | 62346041 |
| 10 | rs76558380  | 104915471 | 6 | rs6933400  | 30907176 | 10 | rs6479719   | 62346137 |
| 10 | rs3977751   | 104920232 | 6 | rs6933909  | 30907266 | 10 | rs7922717   | 62346398 |
| 10 | rs10883839  | 104920341 | 6 | rs3131921  | 30907335 | 10 | rs16915157  | 62346638 |
| 10 | rs35745742  | 104922870 | 6 | rs4711248  | 30907999 | 10 | rs7911164   | 62347839 |
| 10 | rs10509765  | 104924820 | 6 | rs4711249  | 30908266 | 10 | rs61853474  | 62348709 |
| 10 | rs12773916  | 104924838 | 6 | rs13206144 | 30912382 | 10 | rs10761523  | 62349259 |
| 10 | rs4917996   | 104925829 | 6 | rs9501035  | 30912414 | 10 | rs7081184   | 62349324 |
| 10 | rs10509766  | 104926334 | 6 | rs2844702  | 30912481 | 10 | rs117908493 | 62349404 |
| 10 | rs75839032  | 104928164 | 6 | rs2844701  | 30912691 | 10 | rs10761524  | 62349506 |
| 10 | rs35195396  | 104928770 | 6 | rs3130781  | 30914552 | 10 | rs2393673   | 62350366 |
| 10 | rs12416331  | 104928914 | 6 | rs2517451  | 30914751 | 10 | rs78885952  | 62350378 |
| 10 | rs182441718 | 104934398 | 6 | rs3130782  | 30914843 | 10 | rs75989863  | 62350465 |

|    |             |           |   |            |          |    |             |          |
|----|-------------|-----------|---|------------|----------|----|-------------|----------|
| 10 | rs10883841  | 104934709 | 6 | rs13200483 | 30916259 | 10 | rs2393675   | 62350748 |
| 10 | rs12261294  | 104934952 | 6 | rs3094086  | 30919391 | 10 | rs10740035  | 62352606 |
| 10 | rs10786740  | 104935593 | 6 | rs2517449  | 30919701 | 10 | rs10761526  | 62354419 |
| 10 | rs10786741  | 104939182 | 6 | rs11970154 | 30919878 | 10 | rs1009410   | 62354797 |
| 10 | rs12240508  | 104939232 | 6 | rs3132580  | 30920124 | 10 | rs7477771   | 62355728 |
| 10 | rs77602755  | 104939538 | 6 | rs2240804  | 30920890 | 10 | rs1348281   | 62356233 |
| 10 | rs56168342  | 104940867 | 6 | rs2240803  | 30920957 | 10 | rs1009677   | 62357645 |
| 10 | rs79237883  | 104940946 | 6 | rs12190030 | 30921364 | 10 | rs10509131  | 62358361 |
| 10 | rs11191595  | 104943048 | 6 | rs3757340  | 30921882 | 10 | rs10994423  | 62359130 |
| 10 | rs3758543   | 104944744 | 6 | rs2532921  | 30922570 | 10 | rs16915196  | 62359859 |
| 10 | rs10786744  | 104945028 | 6 | rs12212418 | 30924024 | 10 | rs75525457  | 62359891 |
| 10 | rs7077097   | 104945463 | 6 | rs11753326 | 30925985 | 10 | rs56085753  | 62360027 |
| 10 | rs7077291   | 104945751 | 6 | rs11752177 | 30927867 | 10 | rs10994424  | 62360081 |
| 10 | rs77420391  | 104945823 | 6 | rs4711250  | 30930270 | 10 | rs55849269  | 62360085 |
| 10 | rs10883843  | 104947493 | 6 | rs6928738  | 30931059 | 10 | rs1442544   | 62360930 |
| 10 | rs7920251   | 104950197 | 6 | rs3131934  | 30931844 | 10 | rs10761527  | 62361113 |
| 10 | rs79780963  | 104952499 | 6 | rs3131783  | 30932068 | 10 | rs10994425  | 62361400 |
| 10 | rs115952365 | 104952587 | 6 | rs2844697  | 30932309 | 10 | rs75645667  | 62361525 |
| 10 | rs10748839  | 104953547 | 6 | rs3095150  | 30932532 | 10 | rs10994426  | 62362164 |
| 10 | rs79179549  | 104953734 | 6 | rs2530715  | 30933517 | 10 | rs10159808  | 62362190 |
| 10 | rs117569499 | 104953892 | 6 | rs3095089  | 30933794 | 10 | rs10160182  | 62362451 |
| 10 | rs11191602  | 104954219 | 6 | rs2254847  | 30933848 | 10 | rs10159993  | 62362546 |
| 10 | rs145267701 | 104954778 | 6 | rs3131933  | 30933864 | 10 | rs12782869  | 62362772 |
| 10 | rs7095304   | 104954795 | 6 | rs2532919  | 30933975 | 10 | rs9415604   | 62362777 |
| 10 | rs11191606  | 104956035 | 6 | rs3095085  | 30937377 | 10 | rs1372710   | 62362958 |
| 10 | rs7100369   | 104956218 | 6 | rs9368649  | 30938883 | 10 | rs117339800 | 62364018 |
| 10 | rs10786745  | 104956827 | 6 | rs3131932  | 30940328 | 10 | rs118126632 | 62364597 |
| 10 | rs12571345  | 104957152 | 6 | rs2530710  | 30940387 | 10 | rs7098097   | 62364991 |
| 10 | rs10883846  | 104958244 | 6 | rs2255625  | 30940705 | 10 | rs4584525   | 62365060 |
| 10 | rs10883847  | 104958284 | 6 | rs3132579  | 30940989 | 10 | rs10740036  | 62365974 |
| 10 | rs12774577  | 104959487 | 6 | rs2255719  | 30941285 | 10 | rs7894641   | 62366430 |
| 10 | rs75075426  | 104960856 | 6 | rs2530708  | 30941691 | 10 | rs80284429  | 62366621 |
| 10 | rs11191608  | 104961119 | 6 | rs2517439  | 30942929 | 10 | rs10821800  | 62367570 |
| 10 | rs12259163  | 104961477 | 6 | rs3131931  | 30945265 | 10 | rs10761528  | 62367660 |
| 10 | rs4917999   | 104963051 | 6 | rs2844682  | 30946148 | 10 | rs1006956   | 62367976 |
| 10 | rs12256506  | 104963618 | 6 | rs2844680  | 30946496 | 10 | rs1006955   | 62368339 |
| 10 | rs11191609  | 104963721 | 6 | rs9394023  | 30947042 | 10 | rs61853514  | 62369984 |
| 10 | rs11818627  | 104964536 | 6 | rs2844679  | 30947365 | 10 | rs17819756  | 62370465 |
| 10 | rs73353848  | 104964620 | 6 | rs2517431  | 30947378 | 10 | rs6479720   | 62370693 |
| 10 | rs72846141  | 104976963 | 6 | rs2517425  | 30949670 | 10 | rs10994429  | 62371079 |
| 10 | rs77664249  | 104978553 | 6 | rs2517424  | 30949996 | 10 | rs2165691   | 62371649 |
| 10 | rs113987398 | 104979168 | 6 | rs2517421  | 30951209 | 10 | rs10821801  | 62371775 |
| 10 | rs73353870  | 104979954 | 6 | rs9295938  | 30953105 | 10 | rs10994430  | 62371953 |
| 10 | rs183592323 | 104980983 | 6 | rs2530699  | 30953240 | 10 | rs6479721   | 62373122 |
| 10 | rs74780752  | 104989168 | 6 | rs9295939  | 30953968 | 10 | rs1442543   | 62373462 |
| 10 | rs55939028  | 104990305 | 6 | rs2844677  | 30955359 | 10 | rs4143096   | 62374033 |
| 10 | rs7922982   | 104990933 | 6 | rs1634731  | 30955681 | 10 | rs1837947   | 62375033 |
| 10 | rs79850157  | 104993304 | 6 | rs2517416  | 30955929 | 10 | rs16915231  | 62375046 |



|    |             |           |   |            |          |    |             |           |
|----|-------------|-----------|---|------------|----------|----|-------------|-----------|
| 10 | rs4917384   | 104995788 | 6 | rs2517415  | 30956779 | 10 | rs10884907  | 111530413 |
| 10 | rs12761878  | 104997012 | 6 | rs886403   | 30957618 | 10 | rs540258    | 111591977 |
| 10 | rs6584545   | 104999266 | 6 | rs3873342  | 30957766 | 10 | rs10884914  | 111594630 |
| 10 | rs7913461   | 105001325 | 6 | rs2249168  | 30958254 | 10 | rs11194888  | 111597714 |
| 10 | rs4918001   | 105013147 | 6 | rs2530695  | 30958494 | 10 | rs11599348  | 111611304 |
| 10 | rs7093667   | 105080575 | 6 | rs2517411  | 30960267 | 10 | rs7918778   | 111611835 |
| 10 | rs12770682  | 105116465 | 6 | rs2844673  | 30961926 | 10 | rs12767800  | 111663558 |
| 10 | rs11191672  | 105138961 | 6 | rs2517409  | 30964393 | 10 | rs10509907  | 111781715 |
| 11 | rs10834330  | 24398195  | 6 | rs2252926  | 30966304 | 10 | rs1349348   | 111794554 |
| 11 | rs2291487   | 46456344  | 6 | rs2517408  | 30966453 | 10 | rs2501578   | 111838873 |
| 11 | rs12574250  | 46491159  | 6 | rs2429295  | 30969498 | 10 | rs61745504  | 111987960 |
| 11 | rs7106740   | 46511497  | 6 | rs2508016  | 30969527 | 11 | rs174868    | 61371283  |
| 11 | rs17197116  | 46520302  | 6 | rs12196237 | 30969781 | 11 | rs903778    | 61435742  |
| 11 | rs7949282   | 46522306  | 6 | rs2253417  | 30970459 | 11 | rs3931642   | 61462424  |
| 11 | rs10160701  | 46551918  | 6 | rs6927057  | 30970879 | 11 | rs12274157  | 61477647  |
| 11 | rs11038913  | 46559730  | 6 | rs11964080 | 30970970 | 11 | rs4963243   | 61494327  |
| 11 | rs12290779  | 46594971  | 6 | rs1634717  | 30972589 | 11 | rs2240287   | 61505583  |
| 11 | rs35619591  | 46690413  | 6 | rs1634718  | 30972865 | 11 | rs198443    | 61505696  |
| 11 | rs8914      | 46699124  | 6 | rs1634719  | 30973165 | 11 | rs61896065  | 61506250  |
| 11 | rs74486166  | 46700203  | 6 | rs2523915  | 30973358 | 11 | rs198442    | 61506468  |
| 11 | rs72912170  | 46701108  | 6 | rs1624944  | 30973535 | 11 | rs736121    | 61506584  |
| 11 | rs10838612  | 46701728  | 6 | rs2523921  | 30975090 | 11 | rs4963255   | 61507606  |
| 11 | rs200777546 | 46702160  | 6 | rs2523924  | 30975224 | 11 | rs11828739  | 61508074  |
| 11 | rs4319473   | 46702691  | 6 | rs1632854  | 30975649 | 11 | rs198441    | 61508379  |
| 11 | rs12574259  | 46704439  | 6 | rs2844666  | 30976781 | 11 | rs198440    | 61508522  |
| 11 | rs61884297  | 46705974  | 6 | rs1634721  | 30977680 | 11 | rs198439    | 61509589  |
| 11 | rs72912177  | 46718663  | 6 | rs2523926  | 30977815 | 11 | rs3741252   | 61511498  |
| 11 | rs28372918  | 46722018  | 6 | rs2530716  | 30978196 | 11 | rs61896068  | 61513400  |
| 11 | rs7932354   | 46722221  | 6 | rs13191258 | 30978717 | 11 | rs139937518 | 61513675  |
| 11 | rs57739486  | 46723516  | 6 | rs12203410 | 30978746 | 11 | rs198424    | 61513725  |
| 11 | rs10769205  | 46723603  | 6 | rs1634723  | 30979156 | 11 | rs2852786   | 61514085  |
| 11 | rs12361673  | 46723937  | 6 | rs9366764  | 30979793 | 11 | rs198423    | 61514670  |
| 11 | rs145722187 | 46724722  | 6 | rs3869095  | 30980015 | 11 | rs117494202 | 61514757  |
| 11 | rs58922799  | 46725196  | 6 | rs12528087 | 30980603 | 11 | rs4963390   | 61514821  |
| 11 | rs11038973  | 46728952  | 6 | rs12528082 | 30980747 | 11 | rs198422    | 61515767  |
| 11 | rs11038977  | 46734384  | 6 | rs9262464  | 30980848 | 11 | rs147252389 | 61515870  |
| 11 | rs61884305  | 46735956  | 6 | rs9380205  | 30981361 | 11 | rs3825036   | 61516476  |
| 11 | rs77920005  | 46737057  | 6 | rs7755364  | 30981715 | 11 | rs3741255   | 61516910  |
| 11 | rs2070850   | 46741495  | 6 | rs9380206  | 30981755 | 11 | rs1615167   | 61518986  |
| 11 | rs3136433   | 46741908  | 6 | rs1634725  | 30982008 | 11 | rs198419    | 61519542  |
| 11 | rs3136435   | 46742426  | 6 | rs7755802  | 30982209 | 11 | rs77053629  | 61519815  |
| 11 | rs3136436   | 46742489  | 6 | rs12211072 | 30982948 | 11 | rs569258    | 61520668  |
| 11 | rs3136439   | 46743135  | 6 | rs9391701  | 30983263 | 11 | rs198465    | 61521318  |
| 11 | rs3136520   | 46743232  | 6 | rs1619376  | 30983326 | 11 | rs520987    | 61521446  |
| 11 | rs3136441   | 46743247  | 6 | rs3871466  | 30983683 | 11 | rs198464    | 61521621  |
| 11 | rs3136447   | 46744368  | 6 | rs7776233  | 30984128 | 11 | rs10709102  | 61523301  |
| 11 | rs3136448   | 46744369  | 6 | rs3869096  | 30984404 | 11 | rs2238003   | 61523735  |
| 11 | rs3136449   | 46744470  | 6 | rs9262492  | 30986015 | 11 | rs198462    | 61524119  |

|    |             |           |   |            |          |    |             |          |
|----|-------------|-----------|---|------------|----------|----|-------------|----------|
| 11 | rs2070851   | 46744528  | 6 | rs2894176  | 30986038 | 11 | rs198461    | 61524366 |
| 11 | rs2070852   | 46744925  | 6 | rs3906268  | 30986079 | 11 | rs2238001   | 61524507 |
| 11 | rs5896      | 46745003  | 6 | rs3873345  | 30986264 | 11 | rs198459    | 61525020 |
| 11 | rs3136456   | 46745861  | 6 | rs3906267  | 30986396 | 11 | rs198476    | 61525730 |
| 11 | rs3136457   | 46746258  | 6 | rs9262495  | 30986527 | 11 | rs198475    | 61526071 |
| 11 | rs3136460   | 46747065  | 6 | rs4585609  | 30986560 | 11 | rs198473    | 61526556 |
| 11 | rs1799867   | 46747979  | 6 | rs12215548 | 30986644 | 11 | rs198472    | 61527266 |
| 11 | rs5898      | 46749648  | 6 | rs9262498  | 30986835 | 11 | rs695186    | 61527927 |
| 11 | rs3136472   | 46750064  | 6 | rs9295942  | 30987010 | 11 | rs198471    | 61528101 |
| 11 | rs3136524   | 46750525  | 6 | rs9262499  | 30987098 | 11 | rs198470    | 61528306 |
| 11 | rs3136474   | 46750819  | 6 | rs12208652 | 30987170 | 11 | rs400075    | 61528814 |
| 11 | rs5900      | 46751059  | 6 | rs4713411  | 30987176 | 11 | rs12224732  | 61529830 |
| 11 | rs1783828   | 57411521  | 6 | rs4713412  | 30987211 | 11 | rs2071212   | 61530837 |
| 11 | rs10896633  | 57424040  | 6 | rs9402255  | 99332848 | 11 | rs10792318  | 61531443 |
| 11 | rs11229087  | 57425699  | 6 | rs10484608 | 99335648 | 11 | rs79519287  | 61531810 |
| 11 | rs1798173   | 57432057  | 6 | rs34316889 | 99374760 | 11 | rs55903902  | 61531991 |
| 11 | rs503037    | 57436530  | 6 | rs7771685  | 99395018 | 11 | rs4963418   | 61533797 |
| 11 | rs1647405   | 57477889  | 6 | rs910423   | 99476741 | 11 | rs113004932 | 61533908 |
| 11 | rs11607056  | 57496820  | 6 | rs12201236 | 99478174 | 11 | rs2071213   | 61534010 |
| 11 | rs2847308   | 57498232  | 6 | rs17059074 | 99484649 | 11 | rs547589    | 61534872 |
| 11 | rs9420      | 57510294  | 6 | rs761636   | 99535539 | 11 | rs650436    | 61536430 |
| 11 | rs7126553   | 57556673  | 6 | rs12190827 | 99550419 | 11 | rs579383    | 61536583 |
| 11 | rs11570190  | 57560452  | 6 | rs6569850  | 99551277 | 11 | rs2269928   | 61537529 |
| 11 | rs665058    | 57579166  | 6 | rs6905786  | 99555756 | 11 | rs174527    | 61538401 |
| 11 | rs708228    | 57585662  | 6 | rs9375932  | 99566736 | 11 | rs149803    | 61539020 |
| 11 | rs7936998   | 57639017  | 6 | rs2388839  | 99574363 | 11 | rs628993    | 61539691 |
| 11 | rs7117205   | 57641883  | 6 | rs4454147  | 99575874 | 11 | rs174528    | 61543499 |
| 11 | rs10890995  | 109327622 | 6 | rs728758   | 99584658 | 11 | rs174529    | 61543961 |
| 11 | rs10890996  | 109328421 | 6 | rs1003243  | 99594876 | 11 | rs174530    | 61546592 |
| 11 | rs1992276   | 109358598 | 6 | rs1496967  | 99597105 | 11 | rs7943728   | 61547068 |
| 11 | rs7129464   | 109530475 | 6 | rs12110525 | 99629252 | 11 | rs72920160  | 61547951 |
| 11 | rs1799978   | 113346351 | 6 | rs6910466  | 99643679 | 11 | rs61747222  | 61548796 |
| 11 | rs4938021   | 113364803 | 6 | rs7769752  | 99662681 | 11 | rs174532    | 61548874 |
| 11 | rs10891567  | 113398627 | 6 | rs9375997  | 99673152 | 11 | rs174535    | 61551356 |
| 11 | rs2514227   | 113404170 | 6 | rs11154755 | 99673981 | 11 | rs174537    | 61552680 |
| 11 | rs11214654  | 113410917 | 6 | rs7757056  | 99680609 | 11 | rs17762402  | 61553201 |
| 11 | rs12222458  | 113417603 | 6 | rs9376014  | 99690090 | 11 | rs61896141  | 61556039 |
| 11 | rs10736469  | 113418222 | 6 | rs1874538  | 99694494 | 11 | rs12786694  | 61556074 |
| 11 | rs7927176   | 123395864 | 6 | rs9389197  | 99736465 | 11 | rs117110139 | 61557422 |
| 11 | rs2075713   | 124617939 | 6 | rs9402636  | 99746934 | 11 | rs102275    | 61557803 |
| 11 | rs12278050  | 133809032 | 6 | rs2076517  | 99748757 | 11 | rs740006    | 61557868 |
| 11 | rs10444323  | 133811160 | 6 | rs9402648  | 99750162 | 11 | rs174538    | 61560081 |
| 11 | rs4937860   | 133814713 | 6 | rs9399120  | 99750197 | 11 | rs412334    | 61560261 |
| 11 | rs493888    | 133832473 | 6 | rs9402650  | 99751460 | 11 | rs695867    | 61561288 |
| 11 | rs329658    | 133849281 | 6 | rs9373111  | 99751681 | 11 | rs193250731 | 61567670 |
| 12 | rs1016388   | 2321868   | 6 | rs9399123  | 99753078 | 11 | rs174546    | 61569830 |
| 12 | rs12424245  | 2322513   | 6 | rs9389252  | 99773908 | 11 | rs174547    | 61570783 |
| 12 | rs200292772 | 2323144   | 6 | rs221525   | 99774241 | 11 | rs174548    | 61571348 |

|    |              |         |   |            |           |    |             |          |
|----|--------------|---------|---|------------|-----------|----|-------------|----------|
| 12 | rs139758774  | 2323145 | 6 | rs9399134  | 99774687  | 11 | rs174549    | 61571382 |
| 12 | rs2283290    | 2323621 | 6 | rs9376088  | 99778293  | 11 | rs174550    | 61571478 |
| 12 | rs11614275   | 2323846 | 6 | rs9376089  | 99778405  | 11 | rs174553    | 61575158 |
| 12 | rs7957545    | 2324042 | 7 | rs6959385  | 12031826  | 11 | rs174555    | 61579760 |
| 12 | rs2238055    | 2324407 | 7 | rs2192735  | 12033933  | 11 | rs174556    | 61580635 |
| 12 | rs11062158   | 2325978 | 7 | rs10280298 | 12049985  | 11 | rs174558    | 61581450 |
| 12 | rs2238056    | 2327944 | 7 | rs11982169 | 12051898  | 11 | rs174560    | 61581764 |
| 12 | rs72653432   | 2329572 | 7 | rs2966619  | 12052059  | 11 | rs762359509 | 61582527 |
| 12 | rs11062161   | 2329970 | 7 | rs17165507 | 12053458  | 11 | rs174561    | 61582708 |
| 12 | rs10774034   | 2330458 | 7 | rs11977758 | 12065305  | 11 | rs116980792 | 61585140 |
| 12 | rs12228890   | 2330997 | 7 | rs2908738  | 12065405  | 11 | rs174562    | 61585144 |
| 12 | rs3922316    | 2331144 | 7 | rs17581371 | 12090560  | 11 | rs174566    | 61592362 |
| 12 | rs2190771    | 2331192 | 7 | rs17581713 | 12105982  | 11 | rs174568    | 61593816 |
| 12 | rs10848642   | 2331572 | 7 | rs4721023  | 12112471  | 11 | rs174569    | 61594164 |
| 12 | rs11062162   | 2332104 | 7 | rs2192744  | 12123472  | 11 | rs191508698 | 61594921 |
| 12 | rs2239028    | 2332210 | 7 | rs12699309 | 12137596  | 11 | rs968567    | 61595564 |
| 12 | rs76799633   | 2332371 | 7 | rs1003433  | 12164100  | 11 | rs99780     | 61596633 |
| 12 | rs4765904    | 2332393 | 7 | rs1003434  | 12164223  | 11 | rs174570    | 61597212 |
| 12 | rs1108221    | 2332795 | 7 | rs12536822 | 12196391  | 11 | rs1535      | 61597972 |
| 12 | rs1108222    | 2332856 | 7 | rs6952272  | 12200060  | 11 | rs117553420 | 61599329 |
| 12 | rs1108074    | 2333484 | 7 | rs1369491  | 12212027  | 11 | rs61897793  | 61599347 |
| 12 | rs1108073    | 2333638 | 7 | rs6460933  | 12391454  | 11 | rs11230803  | 61599991 |
| 12 | rs1304749689 | 2333671 | 7 | rs10267441 | 12394202  | 11 | rs174573    | 61600327 |
| 12 | rs77893928   | 2333743 | 7 | rs17165936 | 12414725  | 11 | rs174574    | 61600342 |
| 12 | rs55802595   | 2333877 | 7 | rs1100136  | 12491829  | 11 | rs2524296   | 61601378 |
| 12 | rs75729273   | 2334076 | 7 | rs12667501 | 12498511  | 11 | rs2845574   | 61601872 |
| 12 | rs11062166   | 2334260 | 7 | rs17166041 | 12506732  | 11 | rs2845573   | 61601908 |
| 12 | rs7312354    | 2334444 | 7 | rs10259444 | 108863910 | 11 | rs174575    | 61602003 |
| 12 | rs7296039    | 2334933 | 7 | rs10230075 | 108864051 | 11 | rs72920193  | 61602572 |
| 12 | rs7977619    | 2335293 | 7 | rs6954533  | 108872792 | 11 | rs2727271   | 61603358 |
| 12 | rs2239030    | 2335941 | 7 | rs848896   | 108960029 | 11 | rs174576    | 61603510 |
| 12 | rs2239031    | 2336169 | 7 | rs1100302  | 108980725 | 11 | rs117220229 | 61604324 |
| 12 | rs76314765   | 2336323 | 7 | rs848866   | 108987486 | 11 | rs2524299   | 61604782 |
| 12 | rs2239032    | 2337138 | 7 | rs848855   | 108991939 | 11 | rs174577    | 61604814 |
| 12 | rs11613885   | 2337370 | 7 | rs1406304  | 109055726 | 11 | rs2072113   | 61604967 |
| 12 | rs2283291    | 2337460 | 7 | rs10256936 | 109085010 | 11 | rs2072114   | 61605215 |
| 12 | rs2239033    | 2337746 | 7 | rs13222164 | 109098364 | 11 | rs174578    | 61605499 |
| 12 | rs3794297    | 2338396 | 7 | rs7778502  | 109101305 | 11 | rs75992720  | 61605578 |
| 12 | rs68089646   | 2338756 | 7 | rs10499972 | 109109099 | 11 | rs174579    | 61605613 |
| 12 | rs6489353    | 2338858 | 7 | rs1721902  | 109209066 | 11 | rs174580    | 61606642 |
| 12 | rs3829331    | 2339250 | 7 | rs1626408  | 109237961 | 11 | rs174581    | 61606683 |
| 12 | rs3794296    | 2339253 | 7 | rs2063937  | 109266627 | 11 | rs174582    | 61607168 |
| 12 | rs117433140  | 2340001 | 7 | rs17156981 | 109269769 | 11 | rs80349011  | 61607457 |
| 12 | rs34382810   | 2340798 | 7 | rs10246950 | 109279682 | 11 | rs17156426  | 61609323 |
| 12 | rs7965923    | 2341385 | 7 | rs10275927 | 109350011 | 11 | rs10897180  | 61609448 |
| 12 | rs7303977    | 2342248 | 7 | rs4730399  | 109352652 | 11 | rs11230807  | 61609708 |
| 12 | rs7135319    | 2342417 | 9 | rs1378062  | 2751726   | 11 | rs174583    | 61609750 |
| 12 | rs7305301    | 2342636 | 9 | rs10967953 | 2756638   | 11 | rs75766519  | 61611033 |

|    |             |         |   |            |           |    |             |          |
|----|-------------|---------|---|------------|-----------|----|-------------|----------|
| 12 | rs6489354   | 2343186 | 9 | rs7857841  | 2756756   | 11 | rs117983270 | 61611710 |
| 12 | rs76086674  | 2343344 | 9 | rs1014240  | 2801007   | 11 | rs11601892  | 61612560 |
| 12 | rs11609729  | 2343551 | 9 | rs7850317  | 2809548   | 11 | rs174587    | 61612830 |
| 12 | rs117924617 | 2344253 | 9 | rs10757715 | 2827752   | 11 | rs12284876  | 61613841 |
| 12 | rs117388872 | 2344560 | 9 | rs2270891  | 2828742   | 11 | rs1790277   | 61613889 |
| 12 | rs769087    | 2344644 | 9 | rs2173904  | 2828765   | 11 | rs17156442  | 61614023 |
| 12 | rs2007044   | 2344960 | 9 | rs12344362 | 2841896   | 11 | rs7935946   | 61615542 |
| 12 | rs1006737   | 2345295 | 9 | rs10757741 | 2851381   | 11 | rs2851682   | 61616012 |
| 12 | rs11062169  | 2345390 | 9 | rs4013197  | 2921825   | 11 | rs78791707  | 61616069 |
| 12 | rs77013632  | 2345479 | 9 | rs10156534 | 2936864   | 11 | rs75471190  | 61616322 |
| 12 | rs11610437  | 2345625 | 9 | rs3847230  | 2937654   | 11 | rs174591    | 61617676 |
| 12 | rs75269774  | 2345796 | 9 | rs17657377 | 3012175   | 11 | rs79303190  | 61618016 |
| 12 | rs11614966  | 2346254 | 9 | rs2876342  | 3079435   | 11 | rs61897795  | 61618169 |
| 12 | rs2159100   | 2346393 | 9 | rs7869695  | 3175247   | 11 | rs174592    | 61618608 |
| 12 | rs12315711  | 2346830 | 9 | rs13288589 | 3182885   | 11 | rs174593    | 61618831 |
| 12 | rs2239034   | 2347694 | 9 | rs10970529 | 3189170   | 11 | rs916924    | 61619181 |
| 12 | rs11062170  | 2348844 | 9 | rs12342853 | 3192845   | 11 | rs916925    | 61619294 |
| 12 | rs2239035   | 2349081 | 9 | rs6476327  | 3215842   | 11 | rs174597    | 61621040 |
| 12 | rs2239036   | 2349141 | 9 | rs17658489 | 3220602   | 11 | rs174598    | 61621194 |
| 12 | rs11612837  | 2349406 | 9 | rs10813760 | 3223166   | 11 | rs174599    | 61621556 |
| 12 | rs4765905   | 2349584 | 9 | rs4741148  | 11339109  | 11 | rs73487492  | 61621611 |
| 12 | rs7975467   | 2350263 | 9 | rs10809441 | 11366549  | 11 | rs174601    | 61623140 |
| 12 | rs882195    | 2350401 | 9 | rs16927615 | 11462576  | 11 | rs2526678   | 61623793 |
| 12 | rs882194    | 2350452 | 9 | rs10119070 | 11573922  | 11 | rs97384     | 61624181 |
| 12 | rs882193    | 2350620 | 9 | rs13296444 | 11610054  | 11 | rs174602    | 61624414 |
| 12 | rs80295761  | 2352835 | 9 | rs2821184  | 11620981  | 11 | rs498793    | 61624705 |
| 12 | rs77175673  | 2353407 | 9 | rs10960066 | 11649791  | 11 | rs526126    | 61624885 |
| 12 | rs78185961  | 2354263 | 9 | rs13296683 | 11700487  | 11 | rs174605    | 61626921 |
| 12 | rs73033370  | 2354530 | 9 | rs10960116 | 11708630  | 11 | rs174608    | 61627484 |
| 12 | rs80071235  | 2354582 | 9 | rs10125636 | 119489471 | 11 | rs174609    | 61627811 |
| 12 | rs2370413   | 2354870 | 9 | rs10120611 | 119523145 | 11 | rs174610    | 61627833 |
| 12 | rs7967379   | 2355460 | 9 | rs10817934 | 119550051 | 11 | rs174611    | 61627881 |
| 12 | rs7297582   | 2355806 | 9 | rs1155556  | 119572334 | 11 | rs74771917  | 61627960 |
| 12 | rs11608296  | 2356371 | 9 | rs13285982 | 119579244 | 11 | rs174615    | 61628964 |
| 12 | rs79446827  | 2356554 | 9 | rs12237386 | 119589080 | 11 | rs174616    | 61629122 |
| 12 | rs79976249  | 2356940 | 9 | rs943309   | 119599526 | 11 | rs174617    | 61629166 |
| 12 | rs78661331  | 2358805 | 9 | rs1326815  | 119618167 | 11 | rs113003506 | 61629377 |
| 12 | rs75892392  | 2359453 | 9 | rs10513280 | 119685920 | 11 | rs11230813  | 61629576 |
| 12 | rs11615998  | 2360166 | 9 | rs10817960 | 119688061 | 11 | rs174619    | 61629666 |
| 12 | rs758170    | 2361460 | 9 | rs7021489  | 119719693 | 11 | rs174620    | 61629747 |
| 12 | rs11609090  | 2361915 | 9 | rs1537528  | 119771893 | 11 | rs174621    | 61630104 |
| 12 | rs11611154  | 2362006 | 9 | rs10817983 | 119808697 | 11 | rs639394    | 61631331 |
| 12 | rs7309075   | 2362116 | 9 | rs10983517 | 119858116 | 11 | rs518511    | 61631454 |
| 12 | rs7138478   | 2362127 | 9 | rs2050272  | 119877837 | 11 | rs3168072   | 61631510 |
| 12 | rs61907761  | 2362198 | 9 | rs12003386 | 126448659 | 11 | rs3741      | 61631614 |
| 12 | rs7139112   | 2362597 | 9 | rs12336857 | 126453684 | 11 | rs12577276  | 61632310 |
| 12 | rs116644100 | 2362890 | 9 | rs7857196  | 126465958 | 11 | rs482548    | 61633182 |
| 12 | rs2239037   | 2363716 | 9 | rs10986093 | 126494022 | 11 | rs11539526  | 61633770 |

|    |             |         |    |            |           |    |             |          |
|----|-------------|---------|----|------------|-----------|----|-------------|----------|
| 12 | rs11612720  | 2363789 | 9  | rs12339991 | 126511085 | 11 | rs113268188 | 61634829 |
| 12 | rs74347853  | 2364229 | 9  | rs2479106  | 126525212 | 11 | rs174623    | 61635294 |
| 12 | rs180703721 | 2364443 | 9  | rs1752156  | 126534512 | 11 | rs7395424   | 61636017 |
| 12 | rs76139517  | 2364448 | 9  | rs2799466  | 126548090 | 11 | rs11230815  | 61636126 |
| 12 | rs79164695  | 2364685 | 9  | rs1752166  | 126558843 | 11 | rs11230816  | 61636253 |
| 12 | rs191226186 | 2365290 | 9  | rs2489159  | 126563910 | 11 | rs11230817  | 61636255 |
| 12 | rs79472832  | 2365480 | 9  | rs12337273 | 126566945 | 11 | rs174626    | 61637057 |
| 12 | rs78308994  | 2365589 | 9  | rs7863739  | 126601256 | 11 | rs7394459   | 61637349 |
| 12 | rs76836074  | 2365643 | 9  | rs589766   | 126629491 | 11 | rs174627    | 61637466 |
| 12 | rs4765910   | 2365903 | 9  | rs2041545  | 126650515 | 11 | rs174628    | 61637587 |
| 12 | rs115124024 | 2365908 | 9  | rs10986126 | 126655730 | 11 | rs7104849   | 61638044 |
| 12 | rs116642590 | 2367096 | 9  | rs677987   | 126656997 | 11 | rs10897181  | 61638234 |
| 12 | rs114364574 | 2367790 | 9  | rs2479102  | 126683955 | 11 | rs79479642  | 61638953 |
| 12 | rs79091024  | 2368141 | 9  | rs12335840 | 126713411 | 11 | rs508768    | 61639335 |
| 12 | rs2370414   | 2368396 | 9  | rs7867942  | 126771321 | 11 | rs7118175   | 61639358 |
| 12 | rs10774035  | 2368674 | 9  | rs80119968 | 126791907 | 11 | rs422249    | 61639488 |
| 12 | rs73033378  | 2368821 | 9  | rs6478638  | 126809736 | 11 | rs174448    | 61639573 |
| 12 | rs117703678 | 2370776 | 9  | rs7867375  | 126828640 | 11 | rs7481842   | 61639705 |
| 12 | rs2283292   | 2371652 | 9  | rs4838102  | 126829238 | 11 | rs7482316   | 61640198 |
| 12 | rs80191236  | 2373810 | 9  | rs2638381  | 126894348 | 11 | rs174449    | 61640379 |
| 12 | rs11615388  | 2374006 | 9  | rs2767762  | 126897258 | 11 | rs6591664   | 61640521 |
| 12 | rs2239038   | 2374130 | 9  | rs2638384  | 126899452 | 11 | rs75306442  | 61641396 |
| 12 | rs11608869  | 2374463 | 9  | rs2807590  | 126899565 | 11 | rs174450    | 61641542 |
| 12 | rs74767351  | 2374646 | 9  | rs10818924 | 126913862 | 11 | rs7115739   | 61641717 |
| 12 | rs79122070  | 2375199 | 9  | rs2767770  | 126914307 | 11 | rs7942717   | 61647288 |
| 12 | rs11616036  | 2375612 | 9  | rs11560587 | 126931710 | 11 | rs174634    | 61647387 |
| 12 | rs1006690   | 2375636 | 10 | rs1855581  | 106371784 | 11 | rs174635    | 61647427 |
| 12 | rs2159101   | 2375687 | 10 | rs10748866 | 106391762 | 11 | rs116672159 | 61648113 |
| 12 | rs7485359   | 2375793 | 10 | rs998300   | 106398315 | 11 | rs7930349   | 61649211 |
| 12 | rs77205646  | 2376027 | 10 | rs4918123  | 106405854 | 11 | rs174454    | 61650747 |
| 12 | rs116229134 | 2376168 | 10 | rs6584627  | 106537058 | 11 | rs116139751 | 61653164 |
| 12 | rs78155648  | 2376292 | 10 | rs4144552  | 106541709 | 11 | rs1000778   | 61655305 |
| 12 | rs80284141  | 2376294 | 10 | rs2451464  | 106555151 | 11 | rs174455    | 61656117 |
| 12 | rs75548797  | 2376651 | 10 | rs1565419  | 106571060 | 11 | rs174456    | 61656182 |
| 12 | rs74393821  | 2376815 | 10 | rs1032317  | 106579347 | 11 | rs174460    | 61657110 |
| 12 | rs1476733   | 2376900 | 10 | rs1873308  | 106580136 | 11 | rs174461    | 61657401 |
| 12 | rs79399264  | 2377952 | 10 | rs1404790  | 106694770 | 11 | rs68112215  | 61657593 |
| 12 | rs116014402 | 2378234 | 10 | rs11192286 | 106786090 | 11 | rs174462    | 61657666 |
| 12 | rs11614796  | 2379100 | 11 | rs7942007  | 31835418  | 11 | rs693672    | 61658629 |
| 12 | rs11609165  | 2379874 | 11 | rs6484540  | 31847791  | 11 | rs6591668   | 61661113 |
| 12 | rs11615807  | 2380232 | 11 | rs624732   | 31869836  | 11 | rs174468    | 61663691 |
| 12 | rs80106079  | 2381056 | 11 | rs1524143  | 31871538  | 11 | rs17764935  | 61664757 |
| 12 | rs79411638  | 2381569 | 11 | rs7935771  | 31872707  | 11 | rs13966     | 61664992 |
| 12 | rs12298346  | 2381910 | 11 | rs12363571 | 31883249  | 11 | rs2235093   | 61665122 |
| 12 | rs114723538 | 2382549 | 11 | rs621611   | 31896170  | 11 | rs174469    | 61667443 |
| 12 | rs4488257   | 2382964 | 11 | rs652722   | 31905534  | 11 | rs112543847 | 61667879 |
| 12 | rs2370415   | 2383050 | 11 | rs683028   | 31922575  | 11 | rs3815045   | 61669946 |
| 12 | rs117565726 | 2383682 | 11 | rs2014429  | 31941035  | 11 | rs174471    | 61670037 |

|    |               |         |    |            |          |    |                |          |
|----|---------------|---------|----|------------|----------|----|----------------|----------|
| 12 | rs2238057     | 2384005 | 11 | rs10734409 | 32033826 | 11 | rs117828446    | 61670646 |
| 12 | rs76777168    | 2384042 | 11 | rs4140451  | 32055285 | 11 | rs12420820     | 61670745 |
| 12 | rs74992059    | 2384150 | 11 | rs224618   | 32064649 | 11 | rs174472       | 61671956 |
| 12 | rs74411248    | 2384223 | 11 | rs224619   | 32065256 | 11 | rs111902278    | 61672147 |
| 12 | rs79426448    | 2384357 | 11 | rs2063016  | 32069871 | 11 | rs174473       | 61672235 |
| 12 | rs77558515    | 2384432 | 11 | rs224634   | 32080615 | 11 | rs174474       | 61672265 |
| 12 | rs7969407     | 2384768 | 11 | rs11031563 | 32080766 | 11 | rs174475       | 61672645 |
| 12 | rs61907778    | 2384815 | 11 | rs224630   | 32087108 | 11 | rs174476       | 61674118 |
| 12 | rs77759718    | 2384894 | 11 | rs11031570 | 32092617 | 11 | rs61898562     | 61676505 |
| 12 | rs7979604     | 2385018 | 12 | rs7963001  | 23770935 | 11 | rs61898564     | 61676897 |
| 12 | rs76173403    | 2385283 | 12 | rs10771012 | 23788075 | 11 | rs174478       | 61678576 |
| 12 | rs76721755    | 2386415 | 12 | rs11047025 | 23805223 | 11 | rs174479       | 61678754 |
| 12 | rs75705537    | 2386772 | 12 | rs4963708  | 23821733 | 11 | rs61898566     | 61679961 |
| 12 | rs10774036    | 2386948 | 12 | rs2900524  | 23842214 | 11 | rs117324079    | 61680386 |
| 12 | rs10744560    | 2387099 | 12 | rs4293213  | 23923620 | 11 | rs540613       | 61680870 |
| 12 | rs79189017    | 2387245 | 12 | rs7968921  | 23960177 | 11 | rs2524287      | 61684550 |
| 12 | rs118004017   | 2387701 | 12 | rs2971157  | 23962011 | 11 | rs77229376     | 61685791 |
| 12 | rs75728817    | 2388507 | 12 | rs9804988  | 23982559 | 11 | rs78156005     | 61685950 |
| 12 | rs114567313   | 2388653 | 12 | rs10505911 | 24022160 | 11 | rs2521561      | 61685989 |
| 12 | rs7972103     | 2388720 | 12 | rs12579703 | 24023486 | 11 | rs2524288      | 61686336 |
| 12 | rs34335441    | 2389220 | 12 | rs4439603  | 24044286 | 11 | rs2524289      | 61687033 |
| 12 | rs77577013    | 2390132 | 12 | rs7136898  | 24054572 | 11 | rs76133863     | 61687130 |
| 12 | rs78184324    | 2391325 | 12 | rs4581551  | 24057198 | 11 | rs11230827     | 61687454 |
| 12 | rs77704787    | 2391412 | 12 | rs7970953  | 24075508 | 11 | rs187943834    | 61687926 |
| 12 | rs74630743    | 2391544 | 12 | rs7139333  | 24127584 | 11 | rs73491252     | 61688705 |
| 12 | rs79832477    | 2391562 | 12 | rs16927028 | 24190428 | 11 | rs78243280     | 61688922 |
| 12 | rs115500284   | 2394025 | 13 | rs1329297  | 44204553 | 11 | rs116985542    | 61689275 |
| 12 | rs76408048    | 2394434 | 13 | rs9525814  | 44221209 | 11 | rs190738753    | 61690079 |
| 12 | rs78525694    | 2394494 | 13 | rs9525816  | 44223898 | 11 | rs2727258      | 61690183 |
| 12 | rs78161460    | 2394704 | 13 | rs17538959 | 44229911 | 11 | rs12420625     | 61690405 |
| 12 | rs12311439    | 2394781 | 13 | rs9594987  | 44230994 | 11 | rs77071864     | 61690420 |
| 12 | rs78683530    | 2394935 | 13 | rs9594989  | 44237392 | 11 | rs741888       | 61690544 |
| 12 | rs117311450   | 2395626 | 13 | rs74436076 | 44238254 | 11 | rs741887       | 61690707 |
| 12 | rs11610448    | 2396153 | 13 | rs9533575  | 44239055 | 11 | rs7927548      | 61690901 |
| 12 | Chr12:2267094 | 2396833 | 13 | rs7332151  | 44239219 | 11 | Chr11:61448595 | 61692019 |
| 12 | rs1984637     | 2397108 | 13 | rs883877   | 44239557 | 11 | rs882169       | 61692130 |
| 12 | rs115724978   | 2397793 | 13 | rs9525821  | 44239706 | 11 | rs17156580     | 61692341 |
| 12 | rs116698755   | 2399295 | 13 | rs57985080 | 44239951 | 11 | rs11825591     | 61693684 |
| 12 | rs117067220   | 2399399 | 13 | rs12100382 | 44240417 | 11 | rs75483554     | 61694349 |
| 12 | rs11614494    | 2399937 | 13 | rs78899204 | 44240501 | 11 | rs2158026      | 61694394 |
| 12 | rs75739143    | 2401270 | 13 | rs74318190 | 44240949 | 11 | rs2521564      | 61696334 |
| 12 | rs79899792    | 2401377 | 13 | rs79255569 | 44241335 | 11 | rs2521565      | 61696675 |
| 12 | rs11615645    | 2402092 | 13 | rs75139428 | 44241376 | 11 | rs140698203    | 61696999 |
| 12 | rs114241316   | 2402144 | 13 | rs1032520  | 44241773 | 11 | rs4963275      | 61697658 |
| 12 | rs76623174    | 2402241 | 13 | rs9533576  | 44242514 | 11 | rs6591673      | 61697904 |
| 12 | rs1024582     | 2402246 | 13 | rs1032521  | 44242578 | 11 | rs78982937     | 61697972 |
| 12 | rs116298939   | 2402318 | 13 | rs77698779 | 44243492 | 11 | rs7928792      | 61698488 |
| 12 | rs56177308    | 2402990 | 13 | rs7140060  | 44243894 | 11 | rs2521567      | 61699055 |

|    |             |          |    |             |          |    |             |          |
|----|-------------|----------|----|-------------|----------|----|-------------|----------|
| 12 | rs7310491   | 2404022  | 13 | rs1390369   | 44245475 | 11 | rs2736604   | 61699827 |
| 12 | rs76540614  | 2405146  | 13 | rs1390370   | 44245602 | 11 | rs75627029  | 61700019 |
| 12 | rs11615601  | 2405598  | 13 | rs12431105  | 44248368 | 11 | rs7120114   | 61700819 |
| 12 | rs76719316  | 2406103  | 13 | rs73186153  | 44249408 | 11 | rs186383379 | 61700884 |
| 12 | rs74500489  | 2406703  | 13 | rs7984720   | 44249607 | 11 | rs2521568   | 61700933 |
| 12 | rs113258895 | 2407139  | 13 | rs73186155  | 44249693 | 11 | rs79972157  | 61702467 |
| 12 | rs4298967   | 2408194  | 13 | rs7986170   | 44249823 | 11 | rs2727273   | 61702603 |
| 12 | rs73033382  | 2408635  | 13 | rs7985113   | 44249964 | 11 | rs12799580  | 61702911 |
| 12 | rs16929233  | 2411198  | 13 | rs7985732   | 44250126 | 11 | rs183092825 | 61703445 |
| 12 | rs302335    | 29905322 | 13 | rs9533579   | 44250236 | 11 | rs61898622  | 61703756 |
| 12 | rs302337    | 29906149 | 13 | rs111389094 | 44250359 | 11 | rs2158027   | 61705207 |
| 12 | rs436124    | 29916839 | 13 | rs9533580   | 44250511 | 11 | rs2736602   | 61705493 |
| 12 | rs302321    | 29928388 | 13 | rs9533581   | 44250640 | 11 | rs2736600   | 61706011 |
| 12 | rs302340    | 29938127 | 13 | rs9316050   | 44250696 | 11 | rs2524293   | 61710538 |
| 12 | rs302342    | 29939628 | 13 | rs9533582   | 44250866 | 11 | rs74556176  | 61710547 |
| 12 | rs4759273   | 57444567 | 13 | rs9567245   | 44251688 | 11 | rs2727269   | 61710822 |
| 12 | rs6581128   | 57583672 | 13 | rs456012    | 44251815 | 11 | rs76368648  | 61710872 |
| 12 | rs1800159   | 57593894 | 13 | rs9316051   | 44251976 | 11 | rs2521572   | 61711475 |
| 12 | rs7978567   | 57595984 | 13 | rs9525823   | 44252093 | 11 | rs77022126  | 61712646 |
| 12 | rs73338162  | 57624701 | 13 | rs55885634  | 44252172 | 11 | rs1534843   | 61713495 |
| 12 | rs2229717   | 57627074 | 13 | rs73186183  | 44252230 | 11 | rs1534842   | 61713590 |
| 12 | rs117244382 | 57627525 | 13 | rs9595000   | 44252415 | 11 | rs74754540  | 61716357 |
| 12 | rs34095989  | 57627717 | 13 | rs117294783 | 44252904 | 11 | rs972355    | 61717337 |
| 12 | rs116973701 | 57629608 | 13 | rs9316052   | 44253109 | 11 | rs972354    | 61717607 |
| 12 | rs3923885   | 57634698 | 13 | rs9525824   | 44253144 | 11 | rs2736597   | 61718036 |
| 12 | rs73338169  | 57635988 | 13 | rs56323657  | 44253928 | 11 | rs77651946  | 61718173 |
| 12 | rs3204635   | 57637593 | 13 | rs9533583   | 44254317 | 11 | rs2736596   | 61719026 |
| 12 | rs73120041  | 57638895 | 13 | rs9533584   | 44254396 | 11 | rs1800007   | 61719387 |
| 12 | rs117927148 | 57640807 | 13 | rs9533585   | 44254414 | 11 | rs2736595   | 61720538 |
| 12 | rs7976512   | 57643686 | 13 | rs9533586   | 44254523 | 11 | rs195166    | 61721584 |
| 12 | rs10876968  | 57644767 | 13 | rs9533587   | 44254672 | 11 | rs2668899   | 61721639 |
| 12 | rs11172134  | 57645789 | 13 | rs299359    | 44255112 | 11 | rs78054615  | 61721718 |
| 12 | rs11172135  | 57647374 | 13 | rs299356    | 44255727 | 11 | rs2736594   | 61722212 |
| 12 | rs78607331  | 57648644 | 13 | rs78953565  | 44256025 | 11 | rs183176    | 61722265 |
| 12 | rs73120051  | 57648772 | 13 | rs9525825   | 44256095 | 11 | rs1109748   | 61722645 |
| 12 | rs4075325   | 57649840 | 13 | rs9533588   | 44256623 | 11 | rs195165    | 61722838 |
| 12 | rs74240697  | 57650897 | 13 | rs7996264   | 44257080 | 11 | rs195164    | 61723556 |
| 12 | rs6581131   | 57652963 | 13 | rs7995938   | 44257120 | 11 | rs168990    | 61723859 |
| 12 | rs7966846   | 57653582 | 13 | rs114265560 | 44257437 | 11 | rs195162    | 61724514 |
| 12 | rs117621047 | 57655968 | 13 | rs9533589   | 44257756 | 11 | rs741886    | 61724787 |
| 12 | rs73338185  | 57656666 | 13 | rs299353    | 44257782 | 11 | rs2955684   | 61725174 |
| 12 | rs11172139  | 57656705 | 13 | rs8002490   | 44258023 | 11 | rs2668898   | 61725498 |
| 12 | rs73120065  | 57657753 | 13 | rs9533590   | 44258085 | 11 | rs195160    | 61726097 |
| 12 | rs77936166  | 57660377 | 13 | rs299351    | 44258436 | 11 | rs1735379   | 61726396 |
| 12 | rs10783818  | 57662563 | 13 | rs117629391 | 44258542 | 11 | rs195158    | 61726871 |
| 12 | rs73338190  | 57666612 | 13 | rs188486    | 44258846 | 11 | rs1801390   | 61727438 |
| 12 | rs10783819  | 57667261 | 13 | rs299350    | 44259026 | 11 | rs195157    | 61727791 |
| 12 | rs79245439  | 57671622 | 13 | rs17652964  | 44259648 | 11 | rs57815521  | 61728147 |

|    |             |           |    |             |          |    |            |          |
|----|-------------|-----------|----|-------------|----------|----|------------|----------|
| 12 | rs73338194  | 57672511  | 13 | rs7491050   | 44259766 | 11 | rs195156   | 61729063 |
| 12 | rs111393283 | 57672530  | 13 | rs299348    | 44260432 | 11 | rs149698   | 61730036 |
| 12 | rs7135142   | 57672913  | 13 | rs299347    | 44260783 | 11 | rs1800008  | 61730183 |
| 12 | rs77784795  | 57674246  | 13 | rs9595002   | 44261394 | 11 | rs1800009  | 61730234 |
| 12 | rs7397991   | 57675203  | 13 | rs79007561  | 44261699 | 11 | rs17185413 | 61730553 |
| 12 | rs7302906   | 57676178  | 13 | rs116933617 | 44262229 | 11 | rs2668897  | 61731233 |
| 12 | rs7133939   | 57676255  | 13 | rs77550665  | 44262459 | 11 | rs1801621  | 61731727 |
| 12 | rs56383506  | 57676788  | 13 | rs1994874   | 44262560 | 11 | rs17156609 | 61731977 |
| 12 | rs12227309  | 57679030  | 13 | rs118131176 | 44262865 | 11 | rs76059597 | 61733349 |
| 12 | rs35007557  | 57679147  | 13 | rs299344    | 44263589 | 11 | rs2073588  | 61736411 |
| 12 | rs56205943  | 57679414  | 13 | rs117561237 | 44264431 | 11 | rs3758977  | 61737244 |
| 12 | rs11172142  | 57680101  | 13 | rs117048727 | 44264686 | 11 | rs12225574 | 61737569 |
| 12 | rs7486863   | 57681122  | 13 | rs9525826   | 44265506 | 11 | rs12799017 | 61738545 |
| 12 | rs10876969  | 57682179  | 13 | rs117148223 | 44265526 | 11 | rs57398279 | 61739142 |
| 12 | rs61937595  | 57682956  | 13 | rs1329292   | 44266920 | 11 | rs3094402  | 61739586 |
| 12 | rs1401994   | 103606574 | 13 | rs79244847  | 44268185 | 11 | rs195446   | 61742966 |
| 12 | rs11612540  | 103607581 | 13 | rs634666    | 44269970 | 11 | rs17156616 | 61743278 |
| 12 | rs998499    | 103611495 | 13 | rs634666    | 44270227 | 11 | rs17156618 | 61744672 |
| 12 | rs4766428   | 110723245 | 13 | rs117437516 | 44270610 | 11 | rs17185574 | 61745694 |
| 12 | rs3782289   | 123449432 | 13 | rs17653052  | 44270635 | 11 | rs10897193 | 61746269 |
| 12 | rs11061056  | 123450867 | 13 | rs9567247   | 44270727 | 11 | rs76978219 | 61746274 |
| 12 | rs116887147 | 123452527 | 13 | rs395138    | 44270894 | 11 | rs10792320 | 61746291 |
| 12 | rs10734978  | 123453034 | 13 | rs455004    | 44271040 | 11 | rs10792321 | 61746789 |
| 12 | rs11061080  | 123453732 | 13 | rs406731    | 44272398 | 11 | rs71490344 | 61747018 |
| 12 | rs7296418   | 123457619 | 13 | rs953102    | 44273385 | 11 | rs12575518 | 61748066 |
| 12 | rs883562    | 123460719 | 13 | rs60885954  | 44273697 | 11 | rs17156632 | 61748188 |
| 12 | rs883563    | 123460823 | 13 | rs11147924  | 44274277 | 11 | rs10897194 | 61748802 |
| 12 | rs884956    | 123460962 | 13 | rs421787    | 44274394 | 11 | rs10160397 | 61749766 |
| 12 | rs117913606 | 123461117 | 13 | rs9567250   | 44274520 | 11 | rs11230849 | 61750823 |
| 12 | rs36004829  | 123461284 | 13 | rs393632    | 44274730 | 11 | rs11230851 | 61751148 |
| 12 | rs3759115   | 123464279 | 13 | rs430838    | 44275321 | 11 | rs4423188  | 61766418 |
| 12 | rs55742290  | 123466111 | 13 | rs7987487   | 44275444 | 11 | rs4963452  | 61815803 |
| 12 | rs67306085  | 123468733 | 13 | rs11618336  | 44275628 | 11 | rs10897213 | 61827748 |
| 12 | rs1568918   | 123469141 | 13 | rs9533592   | 44276433 | 11 | rs668210   | 65783915 |
| 12 | rs3741530   | 123469647 | 13 | rs77504430  | 44277434 | 11 | rs2270448  | 65835931 |
| 12 | rs12828755  | 123470586 | 13 | rs7995406   | 44277710 | 11 | rs524281   | 65886662 |
| 12 | rs12811109  | 123471094 | 13 | rs8000932   | 44278906 | 11 | rs801741   | 65917084 |
| 12 | rs73230029  | 123472472 | 13 | rs7985461   | 44279594 | 11 | rs918299   | 65927607 |
| 12 | rs1463877   | 123473254 | 13 | rs73188061  | 44279675 | 11 | rs17494956 | 65992439 |
| 12 | rs7135296   | 123476586 | 13 | rs78547599  | 44279815 | 11 | rs559298   | 65998757 |
| 12 | rs937564    | 123477311 | 13 | rs7984973   | 44280066 | 11 | rs479018   | 66060546 |
| 12 | rs11061244  | 123478378 | 13 | rs299328    | 44280605 | 11 | rs560577   | 66064126 |
| 12 | rs144623962 | 123480034 | 13 | rs299329    | 44281252 | 11 | rs479315   | 66064991 |
| 12 | rs74954864  | 123480323 | 13 | rs669486    | 44282106 | 11 | rs905770   | 66156765 |
| 12 | rs61955214  | 123482424 | 13 | rs392930    | 44283226 | 11 | rs7947391  | 66186882 |
| 12 | rs190750361 | 123484647 | 13 | rs117746682 | 44283733 | 11 | rs569818   | 66570749 |
| 12 | rs883263    | 123485188 | 13 | rs1021549   | 44283881 | 11 | rs2229745  | 66617790 |
| 12 | rs11061275  | 123485193 | 13 | rs408740    | 44283997 | 11 | rs7122539  | 66662731 |



|    |                 |           |    |             |          |    |             |          |
|----|-----------------|-----------|----|-------------|----------|----|-------------|----------|
| 12 | rs77674871      | 123488393 | 13 | rs419789    | 44284550 | 11 | rs11227628  | 66685356 |
| 12 | rs112484459     | 123488399 | 13 | rs7993757   | 44284688 | 11 | rs10791896  | 66689240 |
| 12 | rs940904        | 123491572 | 13 | rs1831257   | 44293433 | 11 | rs7110302   | 66690454 |
| 12 | rs3897102       | 123492112 | 13 | rs299331    | 44293845 | 11 | rs7119682   | 66714782 |
| 12 | rs12820906      | 123493123 | 13 | rs12864863  | 44294500 | 11 | rs11227668  | 66812338 |
| 12 | rs117992630     | 123493772 | 13 | rs299330    | 44294856 | 11 | rs7112925   | 66826160 |
| 12 | rs78351440      | 123495289 | 13 | rs6561141   | 44295195 | 11 | rs12281359  | 70417181 |
| 12 | rs117242663     | 123495635 | 13 | rs9533598   | 44296027 | 11 | rs7106873   | 70425843 |
| 12 | rs940906        | 123496927 | 13 | rs9533599   | 44296248 | 11 | rs4488220   | 70428477 |
| 12 | rs7305511       | 123498253 | 13 | rs76429286  | 44297268 | 11 | rs11236898  | 70463510 |
| 12 | rs12425850      | 123501972 | 13 | rs10507520  | 44298794 | 11 | rs11236899  | 70463655 |
| 12 | rs12425009      | 123502044 | 13 | rs7993358   | 44299027 | 11 | rs561884    | 70502000 |
| 12 | rs61955217      | 123504147 | 13 | rs7994821   | 44299099 | 11 | rs10501403  | 70552397 |
| 12 | rs75338281      | 123507484 | 13 | rs1493529   | 44299189 | 11 | rs11237269  | 70560051 |
| 12 | rs4759362       | 123508061 | 13 | rs59987358  | 44299284 | 11 | rs751690    | 70607985 |
| 12 | rs77193970      | 123516317 | 13 | rs923850    | 44299310 | 11 | rs1207273   | 70716035 |
| 12 | rs76573394      | 123516411 | 13 | rs80001592  | 44299557 | 12 | rs10848606  | 2140566  |
| 12 | rs2844287       | 123517814 | 13 | rs5019570   | 44299840 | 12 | rs7971903   | 2145507  |
| 12 | rs641760        | 123518866 | 13 | rs17068821  | 44300156 | 12 | rs7958309   | 2149038  |
| 12 | rs74912794      | 123521867 | 13 | rs9525828   | 44300256 | 12 | rs9888368   | 2153616  |
| 12 | rs520088        | 123522150 | 13 | rs111648690 | 44301187 | 12 | rs2108636   | 2159593  |
| 12 | rs523682        | 123522523 | 13 | rs6561143   | 44301443 | 12 | rs740456    | 2168670  |
| 12 | rs76678615      | 123523991 | 13 | rs6561144   | 44301462 | 12 | rs7972947   | 2170433  |
| 12 | rs655293        | 123528405 | 13 | rs77413508  | 44301704 | 12 | rs2238015   | 2175413  |
| 12 | rs11608811      | 123529056 | 13 | rs17539229  | 44303296 | 12 | rs740459    | 2250068  |
| 12 | rs80326885      | 123532142 | 13 | rs75988256  | 44303555 | 12 | rs7304870   | 2273255  |
| 12 | rs4148857       | 123539955 | 13 | rs7316945   | 44304275 | 12 | rs77635569  | 2273641  |
| 12 | rs4148858       | 123540022 | 13 | rs9525830   | 44304458 | 12 | rs11062136  | 2273915  |
| 12 | rs10773921      | 123541606 | 13 | rs79657664  | 44304933 | 12 | rs10848622  | 2274051  |
| 12 | rs4148859       | 123542492 | 13 | rs2029695   | 44305454 | 12 | rs56197809  | 2274606  |
| 12 | rs7957096       | 123544878 | 13 | rs9595006   | 44305890 | 12 | rs74062239  | 2274919  |
| 12 | rs75200457      | 123545834 | 13 | rs9533601   | 44305999 | 12 | rs116863388 | 2275132  |
| 12 | rs117379455     | 123545899 | 13 | rs9567254   | 44306081 | 12 | rs117224316 | 2275587  |
| 12 | rs585522        | 123550813 | 13 | rs4941470   | 44306586 | 12 | rs2238043   | 2275663  |
| 12 | rs484200        | 123550962 | 13 | rs9567256   | 44307013 | 12 | rs118017994 | 2276107  |
| 12 | Chr12:122117299 | 123551346 | 13 | rs17461155  | 44307042 | 12 | rs76370001  | 2277259  |
| 12 | rs28654629      | 123552741 | 13 | rs12431115  | 44308676 | 12 | rs74062240  | 2277318  |
| 12 | rs77064381      | 123554082 | 13 | rs17600057  | 44308790 | 12 | rs2239014   | 2279117  |
| 12 | rs35246351      | 123555116 | 13 | rs117068145 | 44309386 | 12 | rs11062137  | 2280672  |
| 12 | rs117210587     | 123556647 | 13 | rs17064994  | 44310404 | 12 | rs10774029  | 2280807  |
| 12 | rs7964876       | 123558705 | 13 | rs9533602   | 44311636 | 12 | rs11062138  | 2280942  |
| 12 | rs1260294       | 123560289 | 13 | rs9533603   | 44312190 | 12 | rs11062139  | 2281369  |
| 12 | rs596940        | 123560731 | 13 | rs9525833   | 44312651 | 12 | rs2370411   | 2281925  |
| 12 | rs73230051      | 123561638 | 13 | rs9525834   | 44312834 | 12 | rs73050459  | 2282054  |
| 12 | rs12810157      | 123565652 | 13 | rs116894344 | 44313082 | 12 | rs61909092  | 2282683  |
| 12 | rs4148862       | 123568619 | 13 | rs60989732  | 44314169 | 12 | rs2239015   | 2283195  |
| 12 | rs4148863       | 123569375 | 13 | rs74920280  | 44314224 | 12 | rs2239016   | 2283392  |
| 12 | rs78299420      | 123571096 | 13 | rs79758730  | 44315533 | 12 | rs55884343  | 2283603  |

|    |             |           |    |             |          |    |             |         |
|----|-------------|-----------|----|-------------|----------|----|-------------|---------|
| 12 | rs7967118   | 123571503 | 13 | rs7139679   | 44317717 | 12 | rs7298845   | 2284333 |
| 12 | rs10848428  | 123572495 | 13 | rs9525835   | 44318673 | 12 | rs61909093  | 2284995 |
| 12 | rs7312673   | 123572794 | 13 | rs9525836   | 44318707 | 12 | rs2238044   | 2285731 |
| 12 | rs1727307   | 123575742 | 13 | rs7986483   | 44319195 | 12 | rs61909094  | 2285860 |
| 12 | rs61955225  | 123575884 | 13 | rs6561146   | 44319343 | 12 | rs76116619  | 2285880 |
| 12 | rs4148864   | 123580657 | 13 | rs7327966   | 44319574 | 12 | rs3794299   | 2285984 |
| 12 | rs947800    | 123582855 | 13 | rs17600078  | 44319625 | 12 | rs7953823   | 2286022 |
| 12 | rs117689661 | 123585705 | 13 | rs7997792   | 44320785 | 12 | rs74238853  | 2287097 |
| 12 | rs1790094   | 123586688 | 13 | rs766050    | 44321836 | 12 | rs10848625  | 2288405 |
| 12 | rs79769662  | 123586782 | 13 | rs116895426 | 44322598 | 12 | rs10848626  | 2288436 |
| 12 | rs117065261 | 123587714 | 13 | rs17461225  | 44323351 | 12 | rs117361030 | 2288743 |
| 12 | rs1617156   | 123590165 | 13 | rs79469165  | 44324312 | 12 | rs113019285 | 2288889 |
| 12 | rs1790106   | 123591596 | 13 | rs9595008   | 44324766 | 12 | rs2159102   | 2288945 |
| 12 | rs117860345 | 123591781 | 13 | rs143124698 | 44325377 | 12 | rs2239017   | 2289651 |
| 12 | rs7132277   | 123593382 | 13 | rs1411625   | 44325462 | 12 | rs996950    | 2290338 |
| 12 | rs7299943   | 123593485 | 13 | rs9533606   | 44325785 | 12 | rs10774030  | 2292690 |
| 12 | rs73230058  | 123593899 | 13 | rs7336604   | 44327719 | 12 | rs7303140   | 2294006 |
| 12 | rs75589918  | 123594402 | 13 | rs4143229   | 44327799 | 12 | rs758171    | 2294263 |
| 12 | rs12423255  | 123595064 | 13 | rs148856299 | 44328727 | 12 | rs79255478  | 2294491 |
| 12 | rs949143    | 123595163 | 13 | rs11619756  | 44329004 | 12 | rs79398153  | 2295156 |
| 12 | rs4148865   | 123595749 | 13 | rs9533608   | 44329066 | 12 | rs116947827 | 2295261 |
| 12 | rs1727326   | 123600086 | 13 | rs9595009   | 44329883 | 12 | rs11062145  | 2297353 |
| 12 | rs11061615  | 123600864 | 13 | rs1466705   | 44331185 | 12 | rs10744559  | 2298298 |
| 12 | rs1790121   | 123604492 | 13 | rs115011334 | 44332730 | 12 | rs2283287   | 2298724 |
| 12 | rs1790122   | 123606739 | 13 | rs9562510   | 44333748 | 12 | rs2283288   | 2299048 |
| 12 | rs116918050 | 123610753 | 13 | rs73189971  | 44333851 | 12 | rs2238045   | 2299823 |
| 12 | rs76258382  | 123610989 | 13 | rs1493522   | 44335216 | 12 | rs2238047   | 2300008 |
| 12 | rs56347904  | 123612452 | 13 | rs113095637 | 44335483 | 12 | rs111084453 | 2301189 |
| 12 | rs79665790  | 123614832 | 13 | rs117803643 | 44335959 | 12 | rs78557449  | 2303269 |
| 12 | rs76205535  | 123615869 | 13 | rs117978017 | 44336272 | 12 | rs2239018   | 2304357 |
| 12 | rs1727294   | 123616514 | 13 | rs9533609   | 44336779 | 12 | rs2238049   | 2306128 |
| 12 | rs200831962 | 123618362 | 13 | rs78841243  | 44336797 | 12 | rs2238050   | 2306707 |
| 12 | rs11057165  | 123618368 | 13 | rs7321106   | 44337569 | 12 | rs2238051   | 2307175 |
| 12 | rs1790116   | 123618544 | 13 | rs11838826  | 44338776 | 12 | rs2238052   | 2307296 |
| 12 | rs1727316   | 123618603 | 13 | rs17539382  | 44339125 | 12 | rs79311680  | 2307869 |
| 12 | rs6488865   | 123618894 | 13 | rs77427342  | 44339251 | 12 | rs73033311  | 2308797 |
| 12 | rs1727317   | 123618942 | 13 | rs9595012   | 44339427 | 12 | rs10774032  | 2309393 |
| 12 | rs78856743  | 123619648 | 13 | rs17065044  | 44340042 | 12 | rs10459125  | 2309864 |
| 12 | rs1106240   | 123626982 | 13 | rs9525838   | 44340106 | 12 | rs2239020   | 2310452 |
| 12 | rs1106241   | 123627016 | 13 | rs9525839   | 44340683 | 12 | rs2239021   | 2310529 |
| 12 | rs11057167  | 123627491 | 13 | rs9590786   | 44341387 | 12 | rs2239022   | 2310551 |
| 12 | rs77250160  | 123627905 | 13 | rs9533610   | 44342409 | 12 | rs2239023   | 2310616 |
| 12 | rs77380554  | 123627972 | 13 | rs9590787   | 44344300 | 12 | rs2239024   | 2311313 |
| 12 | rs1727302   | 123632930 | 13 | rs1493523   | 44345614 | 12 | rs1860056   | 2311836 |
| 12 | rs74703625  | 123633057 | 13 | rs9533611   | 44345667 | 12 | rs2239025   | 2312282 |
| 12 | rs1727305   | 123633382 | 13 | rs73189985  | 44346523 | 12 | rs2239027   | 2312301 |
| 12 | rs1790090   | 123633424 | 13 | rs75380973  | 44346586 | 12 | rs10848627  | 2312408 |
| 12 | rs949142    | 123634043 | 13 | rs9533612   | 44346988 | 12 | rs10848628  | 2312489 |

|    |             |           |    |                |          |    |             |         |
|----|-------------|-----------|----|----------------|----------|----|-------------|---------|
| 12 | rs1790108   | 123636841 | 13 | rs9525841      | 44347063 | 12 | rs111349392 | 2312620 |
| 12 | rs1716184   | 123637509 | 13 | rs73189986     | 44347594 | 12 | rs34640767  | 2312820 |
| 12 | rs55863153  | 123637698 | 13 | rs9533613      | 44347629 | 12 | rs4765668   | 2312826 |
| 12 | rs1790109   | 123637752 | 13 | rs17065061     | 44348167 | 12 | rs10848629  | 2312897 |
| 12 | rs61187102  | 123639869 | 13 | rs11840638     | 44348520 | 12 | rs4765902   | 2312965 |
| 12 | rs1727314   | 123640664 | 13 | rs11619519     | 44349749 | 12 | rs4765670   | 2313126 |
| 12 | rs1727313   | 123640853 | 13 | rs11147927     | 44351228 | 12 | rs12423277  | 2314319 |
| 12 | rs1051434   | 123641200 | 13 | rs61960107     | 44351271 | 12 | rs10774033  | 2314426 |
| 12 | rs1716162   | 123642538 | 13 | rs17539466     | 44352052 | 12 | rs10848631  | 2314825 |
| 12 | rs1047158   | 123644056 | 13 | rs17600176     | 44352090 | 12 | rs758172    | 2314997 |
| 12 | rs2851439   | 123644420 | 13 | rs77869381     | 44352172 | 12 | rs76603827  | 2315540 |
| 12 | rs10772993  | 123644714 | 13 | rs9533614      | 44352837 | 12 | rs758174    | 2315706 |
| 12 | rs1260317   | 123645323 | 13 | rs9595015      | 44354981 | 12 | rs10848632  | 2315993 |
| 12 | rs1051431   | 123645803 | 13 | rs74878441     | 44356839 | 12 | rs10848634  | 2316127 |
| 12 | rs1260319   | 123645988 | 13 | rs76348938     | 44359570 | 12 | rs78907301  | 2316178 |
| 12 | rs1727296   | 123647725 | 13 | rs77354137     | 44361838 | 12 | rs10848635  | 2316195 |
| 12 | rs1727293   | 123648032 | 13 | rs57130113     | 44362357 | 12 | rs10848636  | 2316493 |
| 12 | rs1716165   | 123648881 | 13 | rs75651784     | 44363137 | 12 | rs10848637  | 2316554 |
| 12 | rs1615350   | 123650335 | 13 | rs7993959      | 44364163 | 12 | rs79475344  | 2317010 |
| 12 | rs1716167   | 123651162 | 13 | rs7993808      | 44364229 | 12 | rs2238053   | 2317096 |
| 12 | rs1716168   | 123651966 | 13 | Chr13:43263124 | 44365124 | 12 | rs11062156  | 2317523 |
| 12 | rs34484751  | 123652527 | 13 | rs9533615      | 44366602 | 12 | rs77372211  | 2317604 |
| 12 | rs117169430 | 123652848 | 13 | rs117194765    | 44366879 | 12 | rs2238054   | 2317644 |
| 12 | rs1727291   | 123654498 | 13 | rs9533616      | 44368071 | 12 | rs11062157  | 2321820 |
| 12 | rs1716176   | 123655467 | 13 | rs9595018      | 44369477 | 12 | rs1016388   | 2321868 |
| 12 | rs1790098   | 123655481 | 13 | rs7335504      | 44370271 | 12 | rs12424245  | 2322513 |
| 12 | rs1790099   | 123656533 | 13 | rs7335893      | 44370429 | 12 | rs200292772 | 2323144 |
| 12 | rs4759367   | 123656544 | 13 | rs7335939      | 44370498 | 12 | rs139758774 | 2323145 |
| 12 | rs1790100   | 123656725 | 13 | rs73191903     | 44371107 | 12 | rs2283290   | 2323621 |
| 12 | rs2682427   | 123656809 | 13 | rs9533617      | 44372671 | 12 | rs11614275  | 2323846 |
| 12 | rs2049114   | 123657338 | 13 | rs58320322     | 44372887 | 12 | rs7957545   | 2324042 |
| 12 | rs12368208  | 123658014 | 13 | rs9533618      | 44373113 | 12 | rs2238055   | 2324407 |
| 12 | rs1727309   | 123658258 | 13 | rs17065076     | 44373509 | 12 | rs11062158  | 2325978 |
| 12 | rs2682428   | 123659380 | 13 | rs76995318     | 44373851 | 12 | rs2238056   | 2327944 |
| 12 | rs1790123   | 123659542 | 13 | rs9590791      | 44374650 | 12 | rs72653432  | 2329572 |
| 12 | rs1716173   | 123660721 | 13 | rs1888303      | 44374981 | 12 | rs11062161  | 2329970 |
| 12 | rs10734898  | 123662408 | 13 | rs1888302      | 44375330 | 12 | rs10774034  | 2330458 |
| 12 | rs1716164   | 123663660 | 13 | rs17065082     | 44375529 | 12 | rs12228890  | 2330997 |
| 12 | rs3759113   | 123664438 | 13 | rs11619557     | 44376241 | 12 | rs3922316   | 2331144 |
| 12 | rs1727301   | 123664514 | 13 | rs11617352     | 44376328 | 12 | rs2190771   | 2331192 |
| 12 | rs2851447   | 123665113 | 13 | rs17065084     | 44376934 | 12 | rs10848642  | 2331572 |
| 12 | rs1727306   | 123665695 | 13 | rs1888301      | 44377001 | 12 | rs11062162  | 2332104 |
| 12 | rs11613128  | 123670792 | 13 | rs61960111     | 44378186 | 12 | rs2239028   | 2332210 |
| 12 | rs184215819 | 123677291 | 13 | rs1999823      | 44378738 | 12 | rs76799633  | 2332371 |
| 12 | rs141871291 | 123677810 | 13 | rs73191914     | 44378806 | 12 | rs4765904   | 2332393 |
| 12 | rs79033960  | 123680935 | 13 | rs73191915     | 44378824 | 12 | rs1108221   | 2332795 |
| 12 | rs1790095   | 123681222 | 13 | rs73191917     | 44379088 | 12 | rs1108222   | 2332856 |
| 12 | rs1790126   | 123683563 | 13 | rs9533622      | 44379822 | 12 | rs1108074   | 2333484 |

|    |             |           |    |             |          |    |              |         |
|----|-------------|-----------|----|-------------|----------|----|--------------|---------|
| 12 | rs74240768  | 123683976 | 13 | rs9590793   | 44379896 | 12 | rs1108073    | 2333638 |
| 12 | rs61955270  | 123684003 | 13 | rs9595019   | 44380677 | 12 | rs1304749689 | 2333671 |
| 12 | rs3759111   | 123687774 | 13 | rs9533623   | 44380753 | 12 | rs77893928   | 2333743 |
| 12 | rs2695478   | 123689521 | 13 | rs9525844   | 44381441 | 12 | rs55802595   | 2333877 |
| 12 | rs4759407   | 123689674 | 13 | rs5803215   | 44382390 | 12 | rs75729273   | 2334076 |
| 12 | rs10846480  | 123691078 | 13 | rs79375028  | 44383915 | 12 | rs11062166   | 2334260 |
| 12 | rs10846480  | 123691083 | 13 | rs11618214  | 44384571 | 12 | rs7312354    | 2334444 |
| 12 | rs74240770  | 123691742 | 13 | rs9525845   | 44385840 | 12 | rs7296039    | 2334933 |
| 12 | rs11057192  | 123693420 | 13 | rs117493653 | 44386208 | 12 | rs7977619    | 2335293 |
| 12 | rs200046426 | 123693957 | 13 | rs9567265   | 44386266 | 12 | rs2239030    | 2335941 |
| 12 | rs2682434   | 123694724 | 13 | rs12583292  | 44386404 | 12 | rs2239031    | 2336169 |
| 12 | rs74240771  | 123696963 | 13 | rs59825019  | 44386772 | 12 | rs76314765   | 2336323 |
| 12 | rs1727325   | 123698332 | 13 | rs79807290  | 44386886 | 12 | rs2239032    | 2337138 |
| 12 | rs1790133   | 123698518 | 13 | rs7330597   | 44387021 | 12 | rs11613885   | 2337370 |
| 12 | rs1790132   | 123698519 | 13 | rs10454566  | 44387119 | 12 | rs2283291    | 2337460 |
| 12 | rs1727324   | 123698603 | 13 | rs117137938 | 44387286 | 12 | rs2239033    | 2337746 |
| 12 | rs1727322   | 123699520 | 13 | rs61960112  | 44387351 | 12 | rs3794297    | 2338396 |
| 12 | rs1716160   | 123700225 | 13 | rs9595021   | 44387580 | 12 | rs68089646   | 2338756 |
| 12 | rs1727320   | 123700476 | 13 | rs41385450  | 44387652 | 12 | rs6489353    | 2338858 |
| 12 | rs1716161   | 123700867 | 13 | rs77982115  | 44388119 | 12 | rs3829331    | 2339250 |
| 12 | rs1790131   | 123701010 | 13 | rs4942245   | 44389479 | 12 | rs3794296    | 2339253 |
| 12 | rs1630905   | 123705330 | 13 | rs111406044 | 44390262 | 12 | rs117433140  | 2340001 |
| 12 | rs36121382  | 123705962 | 13 | rs9525846   | 44390857 | 12 | rs34382810   | 2340798 |
| 12 | rs1626899   | 123708063 | 13 | rs12866387  | 44391936 | 12 | rs7965923    | 2341385 |
| 12 | rs56104963  | 123709406 | 13 | rs1445556   | 44393795 | 12 | rs7303977    | 2342248 |
| 12 | rs1790104   | 123709409 | 13 | rs12583143  | 44394008 | 12 | rs7135319    | 2342417 |
| 12 | rs2851435   | 123712416 | 13 | rs9533628   | 44394248 | 12 | rs7305301    | 2342636 |
| 12 | rs1716172   | 123712712 | 13 | rs9533629   | 44394357 | 12 | rs6489354    | 2343186 |
| 12 | rs1727334   | 123714236 | 13 | rs1813293   | 44394588 | 12 | rs76086674   | 2343344 |
| 12 | rs57676984  | 123714736 | 13 | rs9567271   | 44394715 | 12 | rs11609729   | 2343551 |
| 12 | rs941306    | 123715113 | 13 | rs981071    | 44394894 | 12 | rs117924617  | 2344253 |
| 12 | rs941305    | 123715266 | 13 | rs17065087  | 44395100 | 12 | rs117388872  | 2344560 |
| 12 | rs1716171   | 123716376 | 13 | rs117543541 | 44395232 | 12 | rs769087     | 2344644 |
| 12 | rs75037792  | 123716466 | 13 | rs9595023   | 44395635 | 12 | rs2007044    | 2344960 |
| 12 | rs1716170   | 123716513 | 13 | rs9533632   | 44396431 | 12 | rs1006737    | 2345295 |
| 12 | rs1716169   | 123716930 | 13 | rs9533633   | 44396971 | 12 | rs11062169   | 2345390 |
| 12 | rs191114234 | 123717070 | 13 | rs9533635   | 44397921 | 12 | rs77013632   | 2345479 |
| 12 | rs28362667  | 123717216 | 13 | rs117831487 | 44398402 | 12 | rs11610437   | 2345625 |
| 12 | rs28362669  | 123717354 | 13 | rs1353109   | 44398442 | 12 | rs75269774   | 2345796 |
| 12 | rs117107860 | 123717444 | 13 | rs2172540   | 44399502 | 12 | rs11614966   | 2346254 |
| 12 | rs1727332   | 123718301 | 13 | rs9533636   | 44400004 | 12 | rs2159100    | 2346393 |
| 12 | rs7304782   | 123719444 | 13 | rs17600281  | 44400357 | 12 | rs12315711   | 2346830 |
| 12 | rs7139321   | 123719528 | 13 | rs17065091  | 44400410 | 12 | rs2239034    | 2347694 |
| 12 | rs4759409   | 123719585 | 13 | rs9533637   | 44400685 | 12 | rs2239035    | 2349081 |
| 12 | rs61953361  | 123719836 | 13 | rs9533638   | 44401002 | 12 | rs2239036    | 2349141 |
| 12 | rs10772997  | 123719880 | 13 | rs9533639   | 44401135 | 12 | rs11612837   | 2349406 |
| 12 | rs11057202  | 123720775 | 13 | rs9525849   | 44401761 | 12 | rs4765905    | 2349584 |
| 12 | rs12825832  | 123720810 | 13 | rs7988214   | 44401999 | 12 | rs7975467    | 2350263 |

|    |             |           |    |                |          |    |             |         |
|----|-------------|-----------|----|----------------|----------|----|-------------|---------|
| 12 | rs10772998  | 123721177 | 13 | rs7988096      | 44402078 | 12 | rs882195    | 2350401 |
| 12 | rs73231928  | 123724325 | 13 | rs9525850      | 44402100 | 12 | rs882194    | 2350452 |
| 12 | rs11057203  | 123725688 | 13 | rs9525851      | 44402132 | 12 | rs882193    | 2350620 |
| 12 | rs1879379   | 123727443 | 13 | rs7330760      | 44403088 | 12 | rs80295761  | 2352835 |
| 12 | rs12817892  | 123728702 | 13 | rs7331149      | 44403269 | 12 | rs77175673  | 2353407 |
| 12 | rs10773000  | 123736084 | 13 | rs9634665      | 44404368 | 12 | rs78185961  | 2354263 |
| 12 | rs2280424   | 123738494 | 13 | Chr13:43302411 | 44404411 | 12 | rs73033370  | 2354530 |
| 12 | rs1568427   | 123738678 | 13 | rs4942246      | 44404853 | 12 | rs80071235  | 2354582 |
| 12 | rs1568428   | 123738876 | 13 | rs4942247      | 44405107 | 12 | rs2370413   | 2354870 |
| 12 | rs1879380   | 123739111 | 13 | rs9525852      | 44405197 | 12 | rs7967379   | 2355460 |
| 12 | rs4759411   | 123740843 | 13 | rs17065110     | 44405416 | 12 | rs7297582   | 2355806 |
| 12 | rs11554169  | 123741706 | 13 | rs9567276      | 44405887 | 12 | rs11608296  | 2356371 |
| 12 | rs1969354   | 123741776 | 13 | rs4942248      | 44406805 | 12 | rs79446827  | 2356554 |
| 12 | rs4759371   | 123742563 | 13 | rs17065113     | 44407455 | 12 | rs79976249  | 2356940 |
| 12 | rs199777374 | 123742923 | 13 | rs2325084      | 44407945 | 12 | rs78661331  | 2358805 |
| 12 | rs76327404  | 123743145 | 13 | rs7982698      | 44409919 | 12 | rs75892392  | 2359453 |
| 12 | rs4759413   | 123743436 | 13 | rs117266764    | 44409976 | 12 | rs11615998  | 2360166 |
| 12 | rs4759415   | 123743674 | 13 | rs2325085      | 44410060 | 12 | rs758170    | 2361460 |
| 12 | rs10732573  | 123743883 | 13 | rs2325086      | 44410088 | 12 | rs11609090  | 2361915 |
| 12 | rs10846489  | 123743927 | 13 | rs12872943     | 44410553 | 12 | rs11611154  | 2362006 |
| 12 | rs2337934   | 123745359 | 13 | rs9533646      | 44410669 | 12 | rs7309075   | 2362116 |
| 12 | rs6633      | 123745809 | 13 | rs2084085      | 44411059 | 12 | rs7138478   | 2362127 |
| 12 | rs1801957   | 123745869 | 13 | rs17065125     | 44411149 | 12 | rs61907761  | 2362198 |
| 12 | rs4759416   | 123746357 | 13 | rs117740974    | 44411348 | 12 | rs7139112   | 2362597 |
| 12 | rs4759417   | 123746510 | 13 | rs9567280      | 44411432 | 12 | rs116644100 | 2362890 |
| 12 | rs4759418   | 123746531 | 13 | rs7332503      | 44411563 | 12 | rs2239037   | 2363716 |
| 12 | rs11057215  | 123746795 | 13 | rs12429722     | 44412466 | 12 | rs11612720  | 2363789 |
| 12 | rs10773002  | 123746961 | 13 | rs7320988      | 44413523 | 12 | rs74347853  | 2364229 |
| 12 | rs12828492  | 123747774 | 13 | rs7328883      | 44415369 | 12 | rs180703721 | 2364443 |
| 12 | rs61231969  | 123748216 | 13 | rs7330707      | 44415492 | 12 | rs76139517  | 2364448 |
| 12 | rs12146722  | 123749735 | 13 | rs76331352     | 44415639 | 12 | rs79164695  | 2364685 |
| 12 | rs1402275   | 123750895 | 13 | rs9567281      | 44415778 | 12 | rs191226186 | 2365290 |
| 12 | rs10846490  | 123750994 | 13 | rs61209988     | 44416335 | 12 | rs79472832  | 2365480 |
| 12 | rs2030401   | 123751339 | 13 | rs4941473      | 44416805 | 12 | rs78308994  | 2365589 |
| 12 | rs2271976   | 123751726 | 13 | rs2325087      | 44417390 | 12 | rs76836074  | 2365643 |
| 12 | rs10083067  | 123752263 | 13 | rs2875541      | 44417441 | 12 | rs4765910   | 2365903 |
| 12 | rs75529277  | 123752419 | 13 | rs1822969      | 44418164 | 12 | rs115124024 | 2365908 |
| 12 | rs76514049  | 123752637 | 13 | rs9533652      | 44419532 | 12 | rs116642590 | 2367096 |
| 12 | rs11057222  | 123752905 | 13 | rs75849484     | 44420805 | 12 | rs114364574 | 2367790 |
| 12 | rs73231941  | 123753294 | 13 | rs7339047      | 44421664 | 12 | rs79091024  | 2368141 |
| 12 | rs61953394  | 123753372 | 13 | rs17653353     | 44421746 | 12 | rs2370414   | 2368396 |
| 12 | rs10846491  | 123753492 | 13 | rs77216476     | 44422258 | 12 | rs10774035  | 2368674 |
| 12 | rs11057223  | 123755055 | 13 | rs2065926      | 44422371 | 12 | rs73033378  | 2368821 |
| 12 | rs11057224  | 123755179 | 13 | rs2065925      | 44422652 | 12 | rs117703678 | 2370776 |
| 12 | rs3759114   | 123757144 | 13 | rs2065924      | 44422723 | 12 | rs2283292   | 2371652 |
| 12 | rs75759977  | 123757504 | 13 | rs9525854      | 44422964 | 12 | rs80191236  | 2373810 |
| 12 | rs1109559   | 123757861 | 13 | rs6561147      | 44423082 | 12 | rs11615388  | 2374006 |
| 12 | rs7953929   | 123758235 | 13 | rs1337203      | 44423583 | 12 | rs2239038   | 2374130 |

|    |             |           |    |             |          |    |             |         |
|----|-------------|-----------|----|-------------|----------|----|-------------|---------|
| 12 | rs10846495  | 123760729 | 13 | rs1337203   | 44423621 | 12 | rs11608869  | 2374463 |
| 12 | rs10444439  | 123766437 | 13 | rs2325088   | 44424063 | 12 | rs74767351  | 2374646 |
| 12 | rs61953413  | 123766786 | 13 | rs1466005   | 44424210 | 12 | rs79122070  | 2375199 |
| 12 | rs10846501  | 123768105 | 13 | rs11620300  | 44424344 | 12 | rs11616036  | 2375612 |
| 12 | rs11057239  | 123768246 | 13 | rs77189267  | 44424499 | 12 | rs1006690   | 2375636 |
| 12 | rs11057240  | 123768264 | 13 | rs1808097   | 44424766 | 12 | rs2159101   | 2375687 |
| 12 | rs10846502  | 123768614 | 13 | rs12875768  | 44428305 | 12 | rs7485359   | 2375793 |
| 12 | rs74354194  | 123770140 | 13 | rs118196604 | 44431660 | 12 | rs77205646  | 2376027 |
| 12 | rs61953417  | 123771381 | 13 | rs9562516   | 44431738 | 12 | rs116229134 | 2376168 |
| 12 | rs7974099   | 123771475 | 13 | rs12874590  | 44433363 | 12 | rs78155648  | 2376292 |
| 12 | rs10773003  | 123775127 | 13 | rs12874535  | 44433565 | 12 | rs80284141  | 2376294 |
| 12 | rs80200546  | 123775802 | 13 | rs1562215   | 44433567 | 12 | rs75548797  | 2376651 |
| 12 | rs79015132  | 123776151 | 13 | rs3088362   | 44433630 | 12 | rs74393821  | 2376815 |
| 12 | rs181914282 | 123776159 | 13 | rs1562216   | 44433700 | 12 | rs1476733   | 2376900 |
| 12 | rs61953419  | 123778469 | 13 | rs117389460 | 44434401 | 12 | rs79399264  | 2377952 |
| 12 | rs3088303   | 123779489 | 13 | rs9533659   | 44434663 | 12 | rs116014402 | 2378234 |
| 12 | rs10846507  | 123786492 | 13 | rs9533660   | 44434735 | 12 | rs11614796  | 2379100 |
| 12 | rs58537268  | 123787505 | 13 | rs9533661   | 44434748 | 12 | rs11609165  | 2379874 |
| 12 | rs60755632  | 123787558 | 13 | rs74845940  | 44435494 | 12 | rs11615807  | 2380232 |
| 12 | rs11057250  | 123787811 | 13 | rs77727531  | 44435953 | 12 | rs80106079  | 2381056 |
| 12 | rs12317452  | 123788246 | 13 | rs9533662   | 44435988 | 12 | rs79411638  | 2381569 |
| 12 | rs78862746  | 123789374 | 13 | rs9562517   | 44436444 | 12 | rs12298346  | 2381910 |
| 12 | rs10773005  | 123790007 | 13 | rs9525856   | 44437052 | 12 | rs114723538 | 2382549 |
| 12 | rs11057251  | 123791227 | 13 | rs9567289   | 44437104 | 12 | rs4488257   | 2382964 |
| 12 | rs11057252  | 123791454 | 13 | rs7989353   | 44438957 | 12 | rs2370415   | 2383050 |
| 12 | rs80151828  | 123791858 | 13 | rs7989702   | 44439150 | 12 | rs117565726 | 2383682 |
| 12 | rs74240781  | 123792701 | 13 | rs12865116  | 44440441 | 12 | rs2238057   | 2384005 |
| 12 | rs10846509  | 123792848 | 13 | rs9533664   | 44440527 | 12 | rs76777168  | 2384042 |
| 12 | rs57356592  | 123793660 | 13 | rs9525858   | 44441221 | 12 | rs74992059  | 2384150 |
| 12 | rs3825141   | 123794104 | 13 | rs618179    | 44442033 | 12 | rs74411248  | 2384223 |
| 12 | rs2277343   | 123794450 | 13 | rs1867629   | 44442037 | 12 | rs79426448  | 2384357 |
| 12 | rs10846510  | 123794557 | 13 | rs7322781   | 44442238 | 12 | rs77558515  | 2384432 |
| 12 | rs11057254  | 123794581 | 13 | rs117153101 | 44442365 | 12 | rs7969407   | 2384768 |
| 12 | rs76466196  | 123795580 | 13 | rs17571505  | 44442374 | 12 | rs61907778  | 2384815 |
| 12 | rs80336138  | 123795759 | 13 | rs4942252   | 44443039 | 12 | rs77759718  | 2384894 |
| 12 | rs4759375   | 123796238 | 13 | rs17065161  | 44443723 | 12 | rs7979604   | 2385018 |
| 12 | rs4759377   | 123796849 | 13 | rs11617551  | 44443977 | 12 | rs76173403  | 2385283 |
| 12 | rs10082867  | 123796997 | 13 | rs2121030   | 44444574 | 12 | rs76721755  | 2386415 |
| 12 | rs10846513  | 123798074 | 13 | rs17065164  | 44444706 | 12 | rs75705537  | 2386772 |
| 12 | rs74690356  | 123798352 | 13 | rs116877091 | 44444862 | 12 | rs10774036  | 2386948 |
| 12 | rs77190493  | 123799636 | 13 | rs17065166  | 44444990 | 12 | rs10744560  | 2387099 |
| 12 | rs61751327  | 123799938 | 13 | rs7318147   | 44445153 | 12 | rs79189017  | 2387245 |
| 12 | rs6488868   | 123799974 | 13 | rs7319725   | 44445421 | 12 | rs118004017 | 2387701 |
| 12 | rs10846514  | 123800376 | 13 | rs7334644   | 44445509 | 12 | rs75728817  | 2388507 |
| 12 | rs10773007  | 123800752 | 13 | rs7334812   | 44445538 | 12 | rs114567313 | 2388653 |
| 12 | rs10846515  | 123801672 | 13 | rs12428350  | 44446161 | 12 | rs7972103   | 2388720 |
| 12 | rs61751328  | 123801856 | 13 | rs9533665   | 44446473 | 12 | rs34335441  | 2389220 |
| 12 | rs57416942  | 123801940 | 13 | rs12853286  | 44446817 | 12 | rs77577013  | 2390132 |

|    |             |           |    |             |          |    |               |         |
|----|-------------|-----------|----|-------------|----------|----|---------------|---------|
| 12 | rs10846516  | 123803469 | 13 | rs118030678 | 44446957 | 12 | rs78184324    | 2391325 |
| 12 | rs59295450  | 123803880 | 13 | rs9533666   | 44447183 | 12 | rs77704787    | 2391412 |
| 12 | rs12366872  | 123804721 | 13 | rs9567293   | 44447243 | 12 | rs74630743    | 2391544 |
| 12 | rs61760909  | 123805261 | 13 | rs9533667   | 44448132 | 12 | rs79832477    | 2391562 |
| 12 | rs1060105   | 123806219 | 13 | rs9533668   | 44448522 | 12 | rs115500284   | 2394025 |
| 12 | rs74240784  | 123806666 | 13 | rs2305100   | 44448934 | 12 | rs76408048    | 2394434 |
| 12 | rs77317455  | 123806965 | 13 | rs12875052  | 44449368 | 12 | rs78525694    | 2394494 |
| 12 | rs77916750  | 123807018 | 13 | rs118066719 | 44449900 | 12 | rs78161460    | 2394704 |
| 12 | rs11057266  | 123807545 | 13 | rs9533670   | 44450122 | 12 | rs12311439    | 2394781 |
| 12 | rs10744152  | 123809798 | 13 | rs2325089   | 44450222 | 12 | rs78683530    | 2394935 |
| 12 | rs117843331 | 123809845 | 13 | rs2184882   | 44450346 | 12 | rs117311450   | 2395626 |
| 12 | rs7304190   | 123810375 | 13 | rs9533671   | 44450594 | 12 | rs11610448    | 2396153 |
| 12 | rs12304248  | 123810425 | 13 | rs77007175  | 44450794 | 12 | Chr12:2267094 | 2396833 |
| 12 | rs12312675  | 123810462 | 13 | rs58267485  | 44451477 | 12 | rs1984637     | 2397108 |
| 12 | rs11057272  | 123812197 | 13 | rs7327496   | 44451539 | 12 | rs115724978   | 2397793 |
| 12 | rs10846517  | 123812611 | 13 | rs4942254   | 44451820 | 12 | rs116698755   | 2399295 |
| 12 | rs28419092  | 123812629 | 13 | rs4942255   | 44451844 | 12 | rs117067220   | 2399399 |
| 12 | rs10846518  | 123812763 | 13 | rs67973257  | 44452229 | 12 | rs11614494    | 2399937 |
| 12 | rs10846519  | 123812787 | 13 | rs12868462  | 44453480 | 12 | rs75739143    | 2401270 |
| 12 | rs7297649   | 123813071 | 13 | rs3816311   | 44453783 | 12 | rs79899792    | 2401377 |
| 12 | rs11057273  | 123814466 | 13 | rs3816312   | 44453873 | 12 | rs11615645    | 2402092 |
| 12 | rs7486351   | 123815939 | 13 | rs2275252   | 44454374 | 12 | rs114241316   | 2402144 |
| 12 | rs200166433 | 123816018 | 13 | rs3818818   | 44454455 | 12 | rs76623174    | 2402241 |
| 12 | rs12316131  | 123817796 | 13 | rs9525863   | 44454705 | 12 | rs1024582     | 2402246 |
| 12 | rs10773009  | 123818007 | 13 | rs66688207  | 44454734 | 12 | rs116298939   | 2402318 |
| 12 | rs7484644   | 123818424 | 13 | rs34414396  | 44455233 | 12 | rs56177308    | 2402990 |
| 12 | rs11057276  | 123820397 | 13 | rs182325132 | 44455919 | 12 | rs7310491     | 2404022 |
| 12 | rs7972811   | 123820780 | 13 | rs9567299   | 44456969 | 12 | rs76540614    | 2405146 |
| 12 | rs7486223   | 123821234 | 13 | rs11616803  | 44457109 | 12 | rs11615601    | 2405598 |
| 12 | rs11057278  | 123821609 | 13 | rs11619043  | 44457210 | 12 | rs76719316    | 2406103 |
| 12 | rs7977563   | 123822358 | 13 | rs9525864   | 44457611 | 12 | rs74500489    | 2406703 |
| 12 | rs6488870   | 123822560 | 13 | rs3764147   | 44457925 | 12 | rs113258895   | 2407139 |
| 12 | rs6488871   | 123822639 | 13 | rs9533673   | 44457984 | 12 | rs4298967     | 2408194 |
| 12 | rs7980687   | 123822711 | 13 | rs73174269  | 44458803 | 12 | rs73033382    | 2408635 |
| 12 | rs61953459  | 123823450 | 13 | rs895266    | 44461179 | 12 | rs16929233    | 2411198 |
| 12 | rs11830103  | 123823546 | 13 | rs9533675   | 44461230 | 12 | rs1860002     | 2413803 |
| 12 | rs10773010  | 123823685 | 13 | rs9533676   | 44461618 | 12 | rs7966042     | 2414353 |
| 12 | rs112160305 | 123824516 | 13 | rs61959998  | 44462501 | 12 | rs117839053   | 2415584 |
| 12 | rs67624109  | 123824635 | 13 | rs9533678   | 44463409 | 12 | rs117639423   | 2416680 |
| 12 | rs10846521  | 123825157 | 13 | rs9525867   | 44463557 | 12 | rs7966811     | 2416808 |
| 12 | rs7312145   | 123825339 | 13 | rs9525868   | 44463697 | 12 | rs75726475    | 2416997 |
| 12 | rs7315453   | 123825389 | 13 | rs12428432  | 44464043 | 12 | rs118065562   | 2419083 |
| 12 | rs76725288  | 123827106 | 13 | rs7989857   | 44464090 | 12 | rs11062183    | 2419245 |
| 12 | rs11057282  | 123828556 | 13 | rs1445557   | 44464827 | 12 | rs2190732     | 2419382 |
| 12 | rs7955367   | 123828792 | 13 | rs9533681   | 44465033 | 12 | rs10848645    | 2420244 |
| 12 | rs7973878   | 123828826 | 13 | rs9533682   | 44465405 | 12 | rs4765914     | 2420377 |
| 12 | rs12298826  | 123829028 | 13 | rs7992315   | 44465879 | 12 | rs10774037    | 2420526 |
| 12 | rs34997336  | 123829116 | 13 | rs9567302   | 44466356 | 12 | rs2283293     | 2420607 |

|    |             |           |    |             |          |    |                |          |
|----|-------------|-----------|----|-------------|----------|----|----------------|----------|
| 12 | rs11057284  | 123830692 | 13 | rs117297262 | 44467157 | 12 | rs2108570      | 2421588  |
| 12 | rs7298909   | 123830939 | 13 | rs9533684   | 44468177 | 12 | rs2370419      | 2423857  |
| 12 | rs10846523  | 123832746 | 13 | rs9533685   | 44468331 | 12 | rs2283301      | 2446806  |
| 12 | rs11057287  | 123832854 | 13 | rs1811464   | 44469290 | 12 | rs994901       | 2533178  |
| 12 | rs56116847  | 123835233 | 13 | rs4101376   | 44469835 | 12 | rs2239073      | 2538500  |
| 12 | rs78344454  | 123835678 | 13 | rs187836497 | 44471277 | 12 | rs10491965     | 2551368  |
| 12 | rs9300256   | 123837375 | 13 | rs2121037   | 44471317 | 12 | rs10774048     | 2562541  |
| 12 | rs34896222  | 123838107 | 13 | rs9562521   | 44471470 | 12 | rs4765937      | 2570535  |
| 12 | rs9795593   | 123839052 | 13 | rs9567305   | 44471656 | 12 | rs10848660     | 2579615  |
| 12 | rs9739008   | 123840858 | 13 | rs146164081 | 44471983 | 12 | rs7306916      | 2601363  |
| 12 | rs9739565   | 123840866 | 13 | rs77296273  | 44472138 | 12 | rs4765950      | 2611407  |
| 12 | rs9739171   | 123840994 | 13 | rs17462017  | 44472235 | 12 | rs12231350     | 2635190  |
| 12 | rs9669169   | 123841717 | 13 | rs7321596   | 44472255 | 15 | rs1359003      | 42656939 |
| 12 | rs9669295   | 123842670 | 13 | rs17571812  | 44472462 | 15 | rs1359004      | 42657055 |
| 12 | rs10773014  | 123842897 | 13 | rs75573572  | 44473404 | 15 | rs3850774      | 42658157 |
| 12 | rs9668827   | 123843017 | 13 | rs55658348  | 44473419 | 15 | rs2407707      | 42659350 |
| 12 | rs61955083  | 123843379 | 13 | rs8002861   | 44474517 | 15 | rs4924674      | 42668498 |
| 12 | rs28683528  | 123845351 | 13 | rs1373904   | 44475398 | 15 | rs57134130     | 42669574 |
| 12 | rs28553365  | 123847841 | 13 | rs7318538   | 44475424 | 15 | rs57347762     | 42671558 |
| 12 | rs28660661  | 123848455 | 13 | rs1373903   | 44475514 | 15 | rs28364390     | 42677173 |
| 12 | rs61955086  | 123848987 | 13 | rs12428112  | 44475821 | 15 | Chr15:40465251 | 42677959 |
| 12 | rs28627651  | 123849051 | 13 | rs12428314  | 44476011 | 15 | rs7168709      | 42679306 |
| 12 | rs117135286 | 123849212 | 13 | rs2325070   | 44476744 | 15 | rs28364405     | 42679414 |
| 12 | rs60754073  | 123849272 | 13 | rs12869355  | 44478193 | 15 | rs751572       | 42679789 |
| 12 | rs28646185  | 123849629 | 13 | rs12869521  | 44478346 | 15 | rs4924675      | 42681057 |
| 12 | rs28759130  | 123849774 | 13 | rs7994883   | 44478805 | 15 | rs1801449      | 42681199 |
| 12 | rs28376696  | 123849863 | 13 | rs7995004   | 44478820 | 15 | rs16973226     | 42681609 |
| 12 | rs28594416  | 123849921 | 13 | rs78954910  | 44478876 | 15 | rs2412709      | 42681930 |
| 12 | rs28418709  | 123850168 | 13 | rs10507522  | 44479000 | 15 | rs28364428     | 42682705 |
| 12 | rs28517382  | 123850197 | 13 | rs9567308   | 44479738 | 15 | rs28364433     | 42683630 |
| 12 | rs78092282  | 123850260 | 13 | rs77013804  | 44479822 | 15 | rs2412710      | 42683787 |
| 12 | rs61955088  | 123850541 | 13 | rs8001833   | 44480132 | 15 | rs202060806    | 42684389 |
| 12 | rs117718416 | 123852477 | 13 | rs9533689   | 44480413 | 15 | rs12439003     | 42684455 |
| 12 | rs28414347  | 123860025 | 13 | rs9533690   | 44480598 | 15 | rs12324205     | 42684680 |
| 12 | rs28786830  | 123860472 | 13 | rs17600603  | 44481812 | 15 | rs28364447     | 42685454 |
| 12 | rs28458312  | 123863265 | 13 | rs7992088   | 44482005 | 15 | rs17764737     | 42685634 |
| 12 | rs28690392  | 123863576 | 13 | rs9525873   | 44482204 | 15 | rs8024113      | 42686838 |
| 12 | rs28592876  | 123866429 | 13 | rs9533691   | 44482208 | 15 | rs28364458     | 42687263 |
| 12 | rs182270339 | 123867106 | 13 | rs17600623  | 44482517 | 15 | rs7168121      | 42687554 |
| 12 | rs116904769 | 123867183 | 13 | rs7999434   | 44482961 | 15 | rs3115877      | 42688772 |
| 12 | rs28613486  | 123867268 | 13 | rs12867732  | 44483084 | 15 | rs28364469     | 42689318 |
| 12 | rs28636834  | 123871070 | 13 | rs73467552  | 44483215 | 15 | rs3743003      | 42691664 |
| 12 | rs28475177  | 123872037 | 13 | rs68089046  | 44483593 | 15 | rs148044781    | 42694089 |
| 12 | rs28533432  | 123873242 | 13 | rs7983109   | 44484351 | 15 | rs28364492     | 42694568 |
| 12 | rs28660993  | 123875394 | 13 | rs7983279   | 44484409 | 15 | rs2241827      | 42694944 |
| 12 | rs28681105  | 123875525 | 13 | rs6561151   | 44484706 | 15 | rs7163986      | 42696158 |
| 12 | rs28501453  | 123877312 | 13 | rs9316058   | 44485076 | 15 | rs111814065    | 42696239 |
| 12 | rs28820735  | 123878507 | 13 | rs17462156  | 44485551 | 15 | rs2412711      | 42697231 |



|    |             |           |    |             |          |    |             |          |
|----|-------------|-----------|----|-------------|----------|----|-------------|----------|
| 12 | rs28655516  | 123879975 | 13 | rs9567309   | 44485618 | 15 | rs28364514  | 42698753 |
| 12 | rs28410096  | 123880862 | 13 | rs9533694   | 44486382 | 15 | rs3115882   | 42701203 |
| 12 | rs28372579  | 123881176 | 13 | rs9316059   | 44486789 | 15 | rs3115883   | 42701688 |
| 12 | rs28546238  | 123882977 | 13 | rs76959557  | 44486955 | 15 | rs181742437 | 42703210 |
| 12 | rs28532037  | 123883406 | 13 | rs117662940 | 44487206 | 15 | rs116852089 | 42703356 |
| 12 | rs28587386  | 123883853 | 13 | rs7995356   | 44487578 | 15 | rs3115884   | 42703406 |
| 12 | rs28377694  | 123884070 | 13 | rs7997017   | 44487611 | 15 | rs3098423   | 42704105 |
| 12 | rs28472704  | 123887369 | 13 | rs920982    | 44488692 | 15 | rs28364548  | 42704914 |
| 12 | rs144550004 | 123890062 | 13 | rs74347409  | 44489181 | 15 | rs28364550  | 42705007 |
| 12 | rs73216931  | 123891209 | 13 | rs7322107   | 44489602 | 15 | rs28364552  | 42705191 |
| 12 | rs28406193  | 123891865 | 13 | rs11147932  | 44489674 | 15 | rs28364553  | 42705342 |
| 12 | rs73216932  | 123893322 | 13 | rs7322436   | 44489710 | 15 | rs28364554  | 42705371 |
| 12 | rs28694725  | 123893645 | 13 | rs61960013  | 44490181 | 15 | rs12594633  | 42705464 |
| 12 | rs147353607 | 123893663 | 13 | rs80252743  | 44490288 | 15 | rs180869563 | 42707912 |
| 12 | rs74968466  | 123894014 | 13 | rs74516505  | 44490562 | 15 | rs62022300  | 42709998 |
| 12 | rs28573238  | 123894098 | 13 | rs4942259   | 44490577 | 15 | rs17708630  | 42710177 |
| 12 | rs56309603  | 123895053 | 13 | rs9525874   | 44491229 | 15 | rs61071861  | 42710219 |
| 12 | rs28664930  | 123895197 | 13 | rs9595036   | 44491355 | 15 | rs62022303  | 42713462 |
| 12 | rs28539053  | 123895263 | 13 | rs117630415 | 44492074 | 15 | rs117272458 | 42714028 |
| 12 | rs28569885  | 123897177 | 13 | rs583271    | 44493527 | 15 | rs7169521   | 42715944 |
| 12 | rs2137558   | 123899505 | 13 | rs9533697   | 44493863 | 15 | rs3742999   | 42716581 |
| 12 | rs1660      | 123900107 | 13 | rs9567314   | 44493872 | 15 | rs17765354  | 42718917 |
| 12 | rs1662      | 123900136 | 13 | rs78218382  | 44494793 | 15 | rs11544099  | 42720288 |
| 12 | rs28713448  | 123901480 | 13 | rs77332730  | 44494921 | 15 | rs11639355  | 42723407 |
| 12 | rs71456795  | 123902892 | 13 | rs79124647  | 44495917 | 15 | rs62022307  | 42726610 |
| 12 | rs28706696  | 123908126 | 13 | rs636086    | 44497715 | 15 | rs28602748  | 42726879 |
| 12 | rs71456796  | 123908570 | 13 | rs9595037   | 44498085 | 15 | rs28726153  | 42726896 |
| 14 | rs1152794   | 99711953  | 13 | rs7319445   | 44498237 | 15 | rs35896246  | 42727621 |
| 14 | rs2236281   | 104000518 | 13 | rs2028812   | 44499013 | 15 | rs3742997   | 42729286 |
| 14 | rs7161305   | 104002234 | 13 | rs823880    | 44500205 | 15 | rs12442046  | 42730193 |
| 14 | rs9324063   | 104006693 | 13 | rs76308253  | 44501454 | 15 | rs3742996   | 42740369 |
| 14 | rs7140558   | 104018651 | 13 | rs9533700   | 44501582 | 15 | rs8026817   | 42741551 |
| 14 | rs4906335   | 104021141 | 13 | rs1596760   | 44503677 | 15 | rs8027283   | 42741636 |
| 14 | rs7148456   | 104028270 | 13 | rs118089263 | 44504077 | 15 | rs34792942  | 42742435 |
| 14 | rs2296482   | 104029819 | 13 | rs189369295 | 44504237 | 15 | rs12101559  | 42742464 |
| 14 | rs12889403  | 104034746 | 13 | rs78982232  | 44504869 | 15 | rs12440118  | 42744094 |
| 14 | rs7140568   | 104041374 | 13 | rs115387512 | 44506403 | 15 | rs2899050   | 42745702 |
| 14 | rs8017993   | 104047734 | 13 | rs622920    | 44506671 | 15 | rs17709180  | 42746391 |
| 14 | rs2403197   | 104053764 | 13 | rs9567319   | 44507089 | 15 | rs76008547  | 42747985 |
| 14 | rs8021368   | 104074810 | 13 | rs590566    | 44507533 | 15 | rs57734638  | 42749013 |
| 14 | rs729438    | 104092789 | 13 | rs78018040  | 44507812 | 15 | rs16973261  | 42749023 |
| 14 | rs709400    | 104149475 | 13 | rs617412    | 44507962 | 15 | rs17709287  | 42751917 |
| 14 | rs12432907  | 104168378 | 13 | rs629531    | 44508363 | 15 | rs4924687   | 42860591 |
| 15 | rs2305645   | 40595565  | 13 | rs115086777 | 44509139 | 15 | rs11632169  | 42903115 |
| 15 | rs1869901   | 40595627  | 13 | rs117705635 | 44509365 | 15 | rs4447398   | 42904904 |
| 15 | rs3784397   | 40596844  | 13 | rs117104581 | 44509510 | 15 | rs12594951  | 42934631 |
| 15 | rs3784399   | 40598294  | 13 | rs17600693  | 44509519 | 15 | rs17774047  | 43013226 |
| 15 | rs1123487   | 40598941  | 13 | rs8000599   | 44509678 | 15 | rs12594483  | 43021986 |

|    |             |          |    |             |          |    |            |          |
|----|-------------|----------|----|-------------|----------|----|------------|----------|
| 15 | rs11071612  | 61834227 | 13 | rs652145    | 44509833 | 15 | rs11070378 | 43076324 |
| 15 | rs7174831   | 61838454 | 13 | rs2875537   | 44510432 | 15 | rs7167802  | 43116906 |
| 15 | rs4775413   | 61840103 | 13 | rs61960016  | 44510451 | 15 | rs3825877  | 85174631 |
| 15 | rs4775419   | 61860911 | 13 | rs61960018  | 44510940 | 15 | rs510875   | 85186637 |
| 15 | rs2414716   | 61861402 | 13 | rs669352    | 44511008 | 15 | rs17598561 | 85198606 |
| 15 | rs10163060  | 61861540 | 13 | rs641334    | 44511123 | 15 | rs309430   | 85203070 |
| 15 | rs2414717   | 61861985 | 13 | rs17065212  | 44511435 | 15 | rs10438428 | 85330745 |
| 15 | rs8042151   | 61862802 | 13 | rs111602786 | 44511626 | 15 | rs1429444  | 85379278 |
| 15 | rs8042070   | 61862996 | 13 | rs117479357 | 44511902 | 15 | rs182517   | 85389631 |
| 15 | rs2414718   | 61863133 | 13 | rs17572067  | 44512464 | 15 | rs306207   | 85390346 |
| 15 | rs17270962  | 61864076 | 13 | rs7998410   | 44513260 | 15 | rs16974567 | 85397374 |
| 15 | rs2414719   | 61869851 | 13 | rs12872902  | 44514022 | 15 | rs9944229  | 85404969 |
| 15 | rs12595508  | 61870977 | 13 | rs17462313  | 44514422 | 15 | rs12904777 | 85415745 |
| 15 | rs7496758   | 61882877 | 13 | rs17600726  | 44514431 | 15 | rs8037320  | 85437286 |
| 15 | rs17270983  | 61887768 | 13 | rs9567321   | 44514471 | 15 | rs4842999  | 85446353 |
| 15 | rs16944389  | 61895514 | 13 | rs823888    | 44514974 | 15 | rs16974600 | 85451378 |
| 15 | rs7182531   | 61900183 | 13 | rs592603    | 44515235 | 15 | rs17537076 | 85464498 |
| 15 | rs7168305   | 61903224 | 13 | rs895265    | 44515421 | 15 | rs3825875  | 85467207 |
| 15 | rs7175667   | 61904270 | 13 | rs1337200   | 44515497 | 15 | rs2242046  | 85478729 |
| 15 | rs1971791   | 70576138 | 13 | rs2121032   | 44515645 | 15 | rs4247411  | 85492288 |
| 15 | rs8034191   | 78806023 | 13 | rs2325074   | 44515764 | 15 | rs7170598  | 85533556 |
| 15 | rs10519203  | 78814046 | 13 | rs9533703   | 44516195 | 15 | rs971804   | 85544381 |
| 15 | rs11858230  | 78835552 | 13 | rs79530839  | 44516226 | 15 | rs12900736 | 85558140 |
| 15 | rs2036527   | 78851615 | 13 | rs1108276   | 44516427 | 15 | rs17611075 | 85568939 |
| 15 | rs17486278  | 78867482 | 13 | rs656584    | 44516605 | 16 | rs8061640  | 9702388  |
| 15 | rs637137    | 78873976 | 13 | rs9525876   | 44516825 | 16 | rs13333400 | 9705361  |
| 15 | rs481134    | 78877563 | 13 | rs9533704   | 44516967 | 16 | rs8051282  | 9709527  |
| 15 | rs16969968  | 78882925 | 13 | rs1415367   | 44517780 | 16 | rs1990573  | 9713688  |
| 15 | rs518425    | 78883813 | 13 | rs1337202   | 44517895 | 16 | rs977540   | 9724750  |
| 15 | rs514743    | 78884227 | 13 | rs79507410  | 44517957 | 16 | rs11646985 | 9755469  |
| 15 | rs12910984  | 78891627 | 13 | rs2121031   | 44518147 | 16 | rs17568440 | 9755481  |
| 15 | rs1051730   | 78894339 | 13 | rs2166299   | 44518334 | 16 | rs11642164 | 9757306  |
| 15 | rs12914385  | 78898723 | 13 | rs7997200   | 44518399 | 16 | rs11645816 | 9772106  |
| 15 | rs8042374   | 78908032 | 13 | rs9533705   | 44518595 | 16 | rs3968868  | 9772529  |
| 15 | rs3743074   | 78909480 | 13 | rs9533706   | 44518821 | 16 | rs4063490  | 9772573  |
| 15 | rs6495309   | 78915245 | 13 | rs9533707   | 44518967 | 16 | rs10852232 | 9780993  |
| 15 | rs950776    | 78926018 | 13 | rs9533708   | 44519031 | 16 | rs1476954  | 9793382  |
| 15 | rs2292188   | 84700783 | 13 | rs9533709   | 44519156 | 16 | rs7203936  | 9798986  |
| 15 | rs10520569  | 84729389 | 13 | rs17572130  | 44519281 | 16 | rs9939321  | 9807616  |
| 15 | rs11638297  | 84782417 | 13 | rs9562524   | 44519491 | 16 | rs2215919  | 9811679  |
| 15 | rs12911223  | 84831671 | 13 | rs9533710   | 44519557 | 16 | rs9925720  | 9842752  |
| 15 | rs12591311  | 85087259 | 13 | rs9525878   | 44519733 | 16 | rs1014531  | 9855794  |
| 15 | rs11638788  | 85091287 | 13 | rs9525879   | 44519875 | 16 | rs7190785  | 9873465  |
| 15 | rs1981458   | 91416605 | 13 | rs9567322   | 44519947 | 16 | rs1544604  | 9887244  |
| 15 | rs111239956 | 91417850 | 13 | rs9525880   | 44520348 | 16 | rs8050843  | 9930580  |
| 15 | rs59596774  | 91418237 | 13 | rs17065230  | 44520460 | 16 | rs2215718  | 9938796  |
| 15 | rs4526996   | 91418591 | 13 | rs9533711   | 44520500 | 16 | rs1548808  | 9966207  |
| 15 | rs60994696  | 91418723 | 13 | rs9525881   | 44520683 | 16 | rs9931155  | 9984523  |

|    |             |          |    |             |          |    |            |          |
|----|-------------|----------|----|-------------|----------|----|------------|----------|
| 15 | rs73489557  | 91419490 | 13 | rs17572193  | 44520796 | 16 | rs4782039  | 10006967 |
| 15 | rs12917264  | 91420552 | 13 | rs73175754  | 44520953 | 16 | rs13331097 | 10052349 |
| 15 | rs2071410   | 91420940 | 13 | rs74844209  | 44520983 | 16 | rs11642346 | 10058574 |
| 15 | rs1573643   | 91420973 | 13 | rs17600927  | 44521235 | 16 | rs884918   | 10059826 |
| 15 | rs1573644   | 91421283 | 13 | rs76243355  | 44521306 | 16 | rs3859123  | 10070895 |
| 15 | rs6224      | 91423543 | 13 | rs66992708  | 44521325 | 16 | rs3848326  | 10087961 |
| 15 | rs75493298  | 91423825 | 13 | rs9525882   | 44521853 | 16 | rs844395   | 10102906 |
| 15 | rs6226      | 91424574 | 13 | rs2065923   | 44522053 | 16 | rs837694   | 10110040 |
| 15 | rs6227      | 91425232 | 13 | rs1596758   | 44522183 | 16 | rs2315514  | 10110285 |
| 15 | rs4702      | 91426560 | 13 | rs9525883   | 44523309 | 16 | rs3848333  | 10117555 |
| 15 | rs79865852  | 91426816 | 13 | rs4537909   | 44523508 | 16 | rs1448258  | 10151357 |
| 15 | rs76642265  | 91428188 | 13 | rs9533713   | 44523654 | 16 | rs11074568 | 10176042 |
| 15 | rs2071382   | 91428197 | 13 | rs113491984 | 44523719 | 17 | rs231518   | 41961451 |
| 15 | rs11539637  | 91428290 | 13 | rs1822965   | 44523937 | 17 | rs231492   | 41978756 |
| 15 | rs7177338   | 91428636 | 13 | rs9525884   | 44524160 | 17 | rs231485   | 41982012 |
| 15 | rs1894400   | 91428955 | 13 | rs823886    | 44524613 | 17 | rs1731888  | 41992617 |
| 16 | rs1544604   | 9887244  | 13 | rs9533714   | 44524884 | 17 | rs1731896  | 42014796 |
| 16 | rs8050843   | 9930580  | 13 | rs9533716   | 44526008 | 17 | rs231471   | 42019494 |
| 16 | rs2215718   | 9938796  | 13 | rs117828108 | 44527226 | 17 | rs8079623  | 42027330 |
| 16 | rs1548808   | 9966207  | 13 | rs9567323   | 44528110 | 17 | rs231461   | 42033043 |
| 16 | rs8060141   | 13735912 | 13 | rs7331414   | 44528130 | 17 | rs2700830  | 42042350 |
| 16 | rs12597362  | 13753349 | 13 | rs7338524   | 44528593 | 17 | rs1642599  | 42045138 |
| 16 | rs11646118  | 29926471 | 13 | rs7139721   | 44529173 | 17 | rs9907468  | 42052089 |
| 16 | rs4609871   | 29932064 | 13 | rs7338872   | 44529281 | 17 | rs918242   | 42054739 |
| 16 | rs4283241   | 29988349 | 13 | rs7140117   | 44529348 | 17 | rs9895585  | 42064987 |
| 16 | rs4787491   | 30015337 | 13 | rs7338748   | 44529443 | 17 | rs16940462 | 42108366 |
| 16 | rs9783783   | 30078492 | 13 | rs7320945   | 44529700 | 17 | rs228762   | 42138392 |
| 16 | rs6565174   | 30111904 | 13 | rs7320768   | 44529726 | 17 | rs850856   | 42157739 |
| 16 | rs7698      | 30125800 | 13 | rs9567324   | 44529987 | 17 | rs228757   | 42164885 |
| 16 | rs11865086  | 30130493 | 13 | rs7322264   | 44530336 | 17 | rs400460   | 42182770 |
| 16 | rs11641947  | 58669908 | 13 | rs7326990   | 44530686 | 17 | rs228765   | 42186422 |
| 16 | rs12446487  | 58671815 | 13 | rs59479159  | 44530999 | 17 | rs8065686  | 42193897 |
| 16 | rs12447862  | 58672763 | 13 | rs7334373   | 44532048 | 17 | rs227579   | 42223134 |
| 16 | rs67742851  | 58678335 | 13 | rs7334745   | 44532154 | 17 | rs2071167  | 42287519 |
| 16 | rs12325245  | 58681393 | 13 | rs7334991   | 44532291 | 17 | rs45519733 | 42327850 |
| 16 | rs154440    | 58682616 | 13 | rs9533720   | 44532759 | 17 | rs1476512  | 42330122 |
| 16 | rs9922575   | 58682738 | 13 | rs61469179  | 44532926 | 17 | rs2074108  | 42336149 |
| 16 | rs56071820  | 67712018 | 13 | rs9525887   | 44533189 | 17 | rs5035     | 42338998 |
| 16 | rs7202185   | 67714560 | 13 | rs7318548   | 44533368 | 17 | rs4793092  | 42400480 |
| 16 | rs191901013 | 67725421 | 13 | rs9567328   | 44533647 | 17 | rs3785817  | 42423665 |
| 16 | rs12927959  | 67727069 | 13 | rs9525889   | 44533844 | 17 | rs5848     | 42430244 |
| 16 | rs78563448  | 67731204 | 13 | rs9533722   | 44534486 | 18 | rs17069845 | 60011615 |
| 16 | rs146965632 | 67737337 | 13 | rs77156547  | 44534657 | 18 | rs6567272  | 60027171 |
| 16 | rs56047901  | 67742326 | 13 | rs1373905   | 44534727 | 18 | rs1805034  | 60027241 |
| 16 | rs74900413  | 67743424 | 13 | rs7331538   | 44535434 | 18 | rs8092336  | 60036083 |
| 16 | rs62059344  | 67747306 | 13 | rs9533723   | 44535509 | 18 | rs4426449  | 60042817 |
| 16 | rs4474673   | 67758778 | 13 | rs9533724   | 44535571 | 18 | rs17069906 | 60048394 |
| 16 | rs73591936  | 67761825 | 13 | rs9533725   | 44535669 | 18 | rs2957128  | 60060735 |

|    |             |          |    |             |          |    |             |          |
|----|-------------|----------|----|-------------|----------|----|-------------|----------|
| 16 | rs112526325 | 67761917 | 13 | rs9567330   | 44536248 | 18 | rs3017368   | 60067128 |
| 16 | rs76851342  | 67762803 | 13 | rs9525892   | 44536619 | 18 | rs7227275   | 60067241 |
| 16 | rs8051632   | 67767901 | 13 | rs9525893   | 44536935 | 18 | rs2957145   | 60076799 |
| 16 | rs72790357  | 67769802 | 13 | rs80266230  | 44537676 | 18 | rs8094440   | 60092936 |
| 16 | rs56845922  | 67770828 | 13 | rs9525894   | 44537772 | 18 | rs17070008  | 60115718 |
| 16 | rs9925393   | 67780829 | 13 | rs151319278 | 44537888 | 18 | rs17070018  | 60121794 |
| 16 | rs73591955  | 67782568 | 13 | rs9525895   | 44538352 | 18 | rs12954590  | 60155750 |
| 16 | rs76118107  | 67786611 | 13 | rs9567331   | 44538413 | 18 | rs599323    | 60165701 |
| 16 | rs10775302  | 67792439 | 13 | rs9567332   | 44538710 | 18 | rs2032396   | 60217134 |
| 16 | rs187399063 | 67792741 | 13 | rs61960023  | 44538830 | 18 | rs1052315   | 60253761 |
| 16 | rs117024179 | 67795150 | 13 | rs9533726   | 44538922 | 18 | rs8095794   | 60267933 |
| 16 | rs6499141   | 67797134 | 13 | rs9525896   | 44539105 | 18 | rs188624    | 60322949 |
| 16 | rs186039084 | 67797575 | 13 | rs1445555   | 44539361 | 19 | rs7257072   | 19267990 |
| 16 | rs16957524  | 67798005 | 13 | rs9533727   | 44539848 | 19 | rs72997195  | 19301232 |
| 16 | rs73591968  | 67803063 | 13 | rs9562527   | 44540696 | 19 | rs78454476  | 19301296 |
| 16 | rs28580313  | 67806351 | 13 | rs12431170  | 44542742 | 19 | rs62135502  | 19303185 |
| 16 | rs118016432 | 67806696 | 13 | rs1530489   | 44543013 | 19 | rs79003009  | 19303284 |
| 16 | rs117829552 | 67814653 | 13 | rs1530488   | 44543024 | 19 | rs1050483   | 19303802 |
| 16 | rs8058835   | 67814865 | 13 | rs1530487   | 44543106 | 19 | rs2283626   | 19304965 |
| 16 | rs117588620 | 67815040 | 13 | rs111584242 | 44543173 | 19 | rs72997200  | 19307797 |
| 16 | rs77789640  | 67824465 | 13 | rs3794427   | 44544182 | 19 | rs10424365  | 19310527 |
| 16 | rs8057184   | 67827247 | 13 | rs117487964 | 44544275 | 19 | rs12610057  | 19315180 |
| 16 | rs75276053  | 67827734 | 13 | rs113081917 | 44544300 | 19 | rs12982158  | 19316107 |
| 16 | rs9928531   | 67833171 | 13 | rs3794431   | 44544511 | 19 | rs56007657  | 19316338 |
| 16 | rs35652982  | 67834340 | 13 | rs113399414 | 44544665 | 19 | rs79573461  | 19316458 |
| 16 | rs17619927  | 67834585 | 13 | rs3794434   | 44544944 | 19 | rs113571327 | 19316827 |
| 16 | rs12448923  | 67839128 | 13 | rs3794435   | 44544983 | 19 | rs10412238  | 19318158 |
| 16 | rs7199443   | 67841129 | 13 | rs3794436   | 44545134 | 19 | rs28618105  | 19318465 |
| 16 | rs8051653   | 67848515 | 13 | rs3794438   | 44545226 | 19 | rs73537466  | 19318794 |
| 16 | rs35316276  | 67850700 | 13 | rs8000271   | 44550398 | 19 | rs12461092  | 19319484 |
| 16 | rs2008173   | 67856240 | 13 | rs4942260   | 44550570 | 19 | rs80290080  | 19324258 |
| 16 | rs62620177  | 67860637 | 13 | rs4942261   | 44551078 | 19 | rs190534855 | 19324315 |
| 16 | rs2292316   | 67861134 | 13 | rs4942262   | 44551250 | 19 | rs7250569   | 19324443 |
| 16 | rs34693072  | 67861501 | 13 | rs9562529   | 44551293 | 19 | rs62135543  | 19324806 |
| 16 | rs3743733   | 67863451 | 13 | rs9562530   | 44551345 | 19 | rs140514916 | 19325035 |
| 16 | rs8052287   | 67865073 | 13 | rs7325401   | 44551531 | 19 | rs3761077   | 19325963 |
| 16 | rs8052191   | 67865287 | 13 | rs78367309  | 44552853 | 19 | rs2228603   | 19329924 |
| 16 | rs11558533  | 67865937 | 13 | rs79587940  | 44552880 | 19 | rs4808187   | 19330213 |
| 16 | rs73593810  | 67866783 | 13 | rs76481363  | 44553677 | 19 | rs11667950  | 19330553 |
| 16 | rs6499143   | 67874264 | 13 | rs75874478  | 44554086 | 19 | rs77720510  | 19330832 |
| 16 | rs78033862  | 67874701 | 13 | rs79249026  | 44554099 | 19 | rs112254184 | 19331562 |
| 16 | rs3809630   | 67879400 | 13 | rs77316503  | 44555023 | 19 | rs112014012 | 19331858 |
| 16 | rs1113232   | 67879827 | 13 | rs2121036   | 44555182 | 19 | rs2238672   | 19335083 |
| 16 | rs75957286  | 67881989 | 13 | rs117584167 | 44556403 | 19 | rs2238673   | 19335307 |
| 16 | rs57721459  | 67884111 | 13 | rs9567339   | 44556691 | 19 | rs2238674   | 19335751 |
| 16 | rs111402573 | 67884411 | 13 | rs73177327  | 44557667 | 19 | rs2238675   | 19336608 |
| 16 | rs7198357   | 67884619 | 13 | rs78536749  | 44557726 | 19 | rs28409009  | 19340265 |
| 16 | rs12930280  | 67891074 | 13 | rs1822970   | 44559045 | 19 | rs28446016  | 19340407 |

|    |             |          |    |             |          |    |             |          |
|----|-------------|----------|----|-------------|----------|----|-------------|----------|
| 16 | rs72790367  | 67891658 | 13 | rs3764144   | 44559147 | 19 | rs1859055   | 19341160 |
| 16 | rs72790368  | 67892362 | 13 | rs17601039  | 44559850 | 19 | rs11668677  | 19341446 |
| 16 | rs17687442  | 67894626 | 13 | rs4942263   | 44560970 | 19 | rs28510494  | 19341856 |
| 16 | rs1124324   | 67897487 | 13 | rs7996812   | 44561629 | 19 | rs112823387 | 19342455 |
| 16 | rs117878082 | 67898492 | 13 | rs77984903  | 44561815 | 19 | rs10403859  | 19342911 |
| 16 | rs1123072   | 67898797 | 13 | rs77287072  | 44561875 | 19 | rs75072017  | 19344059 |
| 16 | rs13334918  | 67901343 | 13 | rs12867740  | 44562537 | 19 | rs34673002  | 19344525 |
| 16 | rs2271293   | 67902070 | 13 | rs117397946 | 44563029 | 19 | rs11672216  | 19344579 |
| 16 | rs2271294   | 67902326 | 13 | rs17572338  | 44563948 | 19 | rs10424369  | 19345356 |
| 16 | rs117600022 | 67903296 | 13 | rs7326184   | 44564400 | 19 | rs2228600   | 19345802 |
| 16 | rs76649027  | 67905994 | 13 | rs17653933  | 44565349 | 19 | rs77927505  | 19347367 |
| 16 | rs56374641  | 67908713 | 13 | rs17462548  | 44568727 | 19 | rs17215684  | 19349980 |
| 16 | rs34132524  | 67909150 | 13 | rs9533737   | 44568888 | 19 | rs72999016  | 19350103 |
| 16 | rs8060686   | 67911517 | 13 | rs17462562  | 44570770 | 19 | rs13345554  | 19351353 |
| 16 | rs34607252  | 67917958 | 13 | rs117735162 | 44571012 | 19 | rs2229851   | 19351431 |
| 16 | rs73594554  | 67920049 | 13 | rs80207445  | 44571944 | 19 | rs73922843  | 19351761 |
| 16 | rs10468274  | 67922342 | 13 | rs4942264   | 44574282 | 19 | rs75235904  | 19353979 |
| 16 | rs76521039  | 67922697 | 13 | rs79429131  | 44574747 | 19 | rs10402294  | 19354937 |
| 16 | rs73594556  | 67925435 | 13 | rs117839563 | 44575060 | 19 | rs10408021  | 19355908 |
| 16 | rs7196789   | 67927124 | 13 | rs7490086   | 44577770 | 19 | rs4808931   | 19358672 |
| 16 | rs34298659  | 67927697 | 13 | rs7334868   | 53395092 | 19 | rs10423874  | 19359500 |
| 16 | rs16942887  | 67928042 | 13 | rs10162284  | 53397648 | 19 | rs1064395   | 19361735 |
| 16 | rs6499145   | 67929601 | 13 | rs649523    | 53440459 | 19 | rs10401714  | 19363630 |
| 16 | rs78572164  | 67931112 | 13 | rs4886021   | 53466127 | 19 | rs4808933   | 19363812 |
| 16 | rs118106500 | 67931383 | 13 | rs17052423  | 53478139 | 19 | rs72999030  | 19364240 |
| 16 | rs72790373  | 67934780 | 13 | rs7333164   | 53483062 | 19 | rs72999033  | 19366632 |
| 16 | rs117312671 | 67936863 | 13 | rs7987314   | 53485153 | 19 | rs17216041  | 19366643 |
| 16 | rs12599580  | 67950613 | 13 | rs732949    | 53517884 | 19 | rs56044734  | 19366927 |
| 16 | rs76944074  | 67951827 | 13 | rs7337967   | 53519045 | 19 | rs56278919  | 19367190 |
| 16 | rs73594581  | 67955554 | 13 | rs9536326   | 53550095 | 19 | rs55796368  | 19367313 |
| 16 | rs79327462  | 67958058 | 13 | rs1555559   | 53566722 | 19 | rs55762233  | 19367319 |
| 16 | rs117767794 | 67963655 | 13 | rs2298229   | 53602970 | 19 | rs55765017  | 19368264 |
| 16 | rs1134760   | 67964203 | 13 | rs34067666  | 53617309 | 19 | rs56144632  | 19368310 |
| 16 | rs7187289   | 67967878 | 13 | rs2806975   | 53662082 | 19 | rs75590738  | 19368482 |
| 16 | rs14178     | 67969531 | 13 | rs12867491  | 53696774 | 19 | rs118043674 | 19370021 |
| 16 | rs20549     | 67969930 | 14 | rs2021937   | 42113905 | 19 | rs4808934   | 19370917 |
| 16 | rs11574514  | 67971380 | 14 | rs4304945   | 42220920 | 19 | rs56135441  | 19371370 |
| 16 | rs5923      | 67973953 | 14 | rs862541    | 42281445 | 19 | rs7257875   | 19372150 |
| 16 | rs4986970   | 67976320 | 14 | rs4900098   | 42309260 | 19 | rs10422893  | 19372185 |
| 16 | rs1109166   | 67977382 | 14 | rs1951874   | 42317467 | 19 | rs141026619 | 19372723 |
| 16 | rs17851876  | 67979423 | 14 | rs12882576  | 42319515 | 19 | rs74695215  | 19373944 |
| 16 | rs76074266  | 67979541 | 14 | rs1957861   | 42326572 | 19 | rs8105094   | 19374061 |
| 16 | rs11860125  | 67980969 | 14 | rs17092293  | 42337898 | 19 | rs8105984   | 19374068 |
| 16 | rs117213038 | 67981697 | 14 | rs17093516  | 64480358 | 19 | rs35854118  | 19375372 |
| 16 | rs11542821  | 67984589 | 14 | rs4566057   | 64506541 | 19 | rs78538967  | 19375822 |
| 16 | rs116856853 | 67984804 | 14 | rs11158526  | 64557407 | 19 | rs2074298   | 19377716 |
| 16 | rs2292318   | 67985706 | 14 | rs10137972  | 64557734 | 19 | rs117877390 | 19378416 |
| 16 | rs118000276 | 67988447 | 14 | rs2781377   | 64560092 | 19 | rs998732    | 19378671 |

|    |             |          |    |            |           |    |             |          |
|----|-------------|----------|----|------------|-----------|----|-------------|----------|
| 16 | rs9928014   | 67991427 | 14 | rs8007972  | 64564527  | 19 | rs58542926  | 19379549 |
| 16 | rs78818722  | 67991972 | 14 | rs36021513 | 64588825  | 19 | rs72999063  | 19380596 |
| 16 | rs3785098   | 67993643 | 14 | rs34944385 | 64588837  | 19 | rs2074299   | 19380646 |
| 16 | rs3785100   | 67997920 | 14 | rs1268656  | 64647646  | 19 | rs72999068  | 19380685 |
| 16 | rs78335263  | 67998187 | 14 | rs12434245 | 64691853  | 19 | rs12974359  | 19381439 |
| 16 | rs28655136  | 68001447 | 14 | rs17751556 | 64884106  | 19 | rs2074301   | 19381715 |
| 16 | rs147329698 | 68001555 | 14 | rs3818239  | 64914537  | 19 | rs2074303   | 19381755 |
| 16 | rs73596542  | 68004558 | 14 | rs8017803  | 75108422  | 19 | rs116904583 | 19382215 |
| 16 | rs28668419  | 68010195 | 14 | rs10047892 | 75111346  | 19 | rs55822665  | 19383298 |
| 16 | rs28490940  | 68010262 | 14 | rs12323392 | 75115673  | 19 | rs10419245  | 19383755 |
| 16 | rs72790380  | 68012694 | 14 | rs17101733 | 75123026  | 19 | rs78640921  | 19384914 |
| 16 | rs255048    | 68012849 | 14 | rs7153812  | 75173490  | 19 | rs11669578  | 19385080 |
| 16 | rs11643888  | 68013346 | 14 | rs2287400  | 75182937  | 19 | rs735273    | 19385411 |
| 16 | rs255049    | 68013471 | 14 | rs11844957 | 75224651  | 19 | rs8103496   | 19386015 |
| 16 | rs255054    | 68017356 | 14 | rs2111705  | 75261641  | 19 | rs74182631  | 19386738 |
| 16 | rs1107767   | 68020063 | 14 | rs11159103 | 75271354  | 19 | rs757346    | 19387185 |
| 16 | rs78539049  | 68021125 | 14 | rs12588415 | 75278211  | 19 | rs2010506   | 19387356 |
| 16 | rs1133090   | 68021468 | 14 | rs10483861 | 75279039  | 19 | rs2074550   | 19387743 |
| 16 | rs117782866 | 68023169 | 14 | rs10138360 | 75293386  | 19 | rs2074551   | 19388057 |
| 16 | rs146418648 | 68023776 | 14 | rs2058919  | 75310812  | 19 | rs17750998  | 19388446 |
| 16 | rs255052    | 68024995 | 14 | rs2359239  | 75326771  | 19 | rs17683766  | 19388888 |
| 16 | rs73596365  | 68026126 | 14 | rs722599   | 75327443  | 19 | rs11555053  | 19390185 |
| 16 | rs10527563  | 68030270 | 14 | rs28447028 | 75340133  | 19 | rs2301784   | 19390749 |
| 16 | rs7204974   | 68033539 | 14 | rs7146160  | 75346451  | 19 | rs6511026   | 19391402 |
| 16 | rs8059305   | 68036666 | 14 | rs2268613  | 75408500  | 19 | rs11671506  | 19391838 |
| 16 | rs79577483  | 68036939 | 14 | rs11850328 | 75426250  | 19 | rs6511027   | 19391851 |
| 16 | rs11075664  | 68038763 | 14 | rs175502   | 75533679  | 19 | rs2269873   | 19392401 |
| 16 | rs7204192   | 68039309 | 14 | rs175495   | 75542182  | 19 | rs2023882   | 19405405 |
| 16 | rs16957696  | 68039850 | 14 | rs96358    | 75572265  | 19 | rs2023883   | 19405480 |
| 16 | rs76646352  | 68044797 | 14 | rs7145159  | 75583268  | 19 | rs74182633  | 19406707 |
| 16 | rs9674047   | 68045046 | 14 | rs12883497 | 75587014  | 19 | rs12979148  | 19406869 |
| 16 | rs56377913  | 68047851 | 14 | rs1570712  | 103783847 | 19 | rs10401969  | 19407718 |
| 16 | rs78962063  | 68052481 | 14 | rs17677788 | 103792698 | 19 | rs2301785   | 19408164 |
| 16 | rs2074575   | 68055378 | 14 | rs8009817  | 103815090 | 19 | rs4808939   | 19410480 |
| 16 | rs13816     | 68055495 | 14 | rs7155749  | 103825318 | 19 | rs2315022   | 19413381 |
| 16 | rs237831    | 68057096 | 14 | rs3759579  | 103851272 | 19 | rs2315023   | 19413393 |
| 16 | rs149214641 | 68058643 | 14 | rs8014182  | 103859962 | 19 | rs114573949 | 19414379 |
| 16 | rs74652527  | 68060474 | 14 | rs2010281  | 103862322 | 19 | rs3752201   | 19415628 |
| 16 | rs76836953  | 68061763 | 14 | rs12879663 | 103874215 | 19 | rs1010207   | 19416045 |
| 16 | rs12448227  | 68068627 | 14 | rs12896612 | 103877868 | 19 | rs117109209 | 19417145 |
| 16 | rs11075665  | 68070774 | 14 | rs12882130 | 103878774 | 19 | rs76944848  | 19417512 |
| 16 | rs7193935   | 68071147 | 14 | rs2065017  | 103879579 | 19 | rs4808943   | 19420840 |
| 16 | rs7190079   | 68073834 | 14 | rs12885762 | 103882200 | 19 | rs1859287   | 19422187 |
| 16 | rs80346622  | 68074419 | 14 | rs12892062 | 103883512 | 19 | rs113189294 | 19423086 |
| 16 | rs73598006  | 68074454 | 14 | rs7158822  | 103887868 | 19 | rs11668104  | 19426181 |
| 16 | rs1985437   | 68074857 | 14 | rs12885234 | 103889181 | 19 | rs80146298  | 19426317 |
| 16 | rs58388686  | 68075439 | 14 | rs17679127 | 103890091 | 19 | rs2315025   | 19426609 |
| 16 | rs12445533  | 68082527 | 14 | rs12897976 | 103893010 | 19 | rs8108647   | 19427623 |

|    |             |          |    |            |           |    |             |          |
|----|-------------|----------|----|------------|-----------|----|-------------|----------|
| 16 | rs12598256  | 68084021 | 14 | rs8015712  | 103895840 | 19 | rs3934667   | 19431423 |
| 16 | rs76418810  | 68084479 | 14 | rs1951389  | 103898525 | 19 | rs4539728   | 19431480 |
| 16 | rs79323429  | 68084594 | 14 | rs12894275 | 103901424 | 19 | rs12460764  | 19431963 |
| 16 | rs11555011  | 68088485 | 14 | rs2065015  | 103904061 | 19 | rs117924058 | 19432416 |
| 16 | rs75909028  | 68089578 | 14 | rs7155822  | 103922390 | 19 | rs4808194   | 19435680 |
| 16 | rs75899576  | 68090521 | 14 | rs10459573 | 103925457 | 19 | rs4239639   | 19435876 |
| 16 | rs2418739   | 68092850 | 14 | rs4906327  | 103929039 | 19 | rs7247309   | 19439631 |
| 16 | rs111227007 | 68093138 | 14 | rs8012127  | 103942762 | 19 | rs3764567   | 19440066 |
| 16 | rs118156865 | 68095291 | 14 | rs3783397  | 103947289 | 19 | rs1009136   | 19440428 |
| 16 | rs35432211  | 68095449 | 14 | rs3783398  | 103949378 | 19 | rs12985655  | 19442434 |
| 16 | rs113993355 | 68099122 | 14 | rs12896919 | 103956713 | 19 | rs17751109  | 19443334 |
| 16 | rs79375669  | 68099262 | 14 | rs17617994 | 103959289 | 19 | rs10640109  | 19443406 |
| 16 | rs7201742   | 68099821 | 14 | rs13987    | 103969909 | 19 | rs8103197   | 19443466 |
| 16 | rs2285912   | 68100461 | 14 | rs4906331  | 103971374 | 19 | rs74980519  | 19443968 |
| 16 | rs113896227 | 68101480 | 14 | rs12885786 | 103972503 | 19 | rs117923614 | 19443986 |
| 16 | rs75733050  | 68101941 | 14 | rs4906332  | 103980134 | 19 | rs11085259  | 19445856 |
| 16 | rs75150864  | 68101998 | 14 | rs2246490  | 103984294 | 19 | rs12463074  | 19445869 |
| 16 | rs2285910   | 68104422 | 14 | rs2296487  | 103996205 | 19 | rs769267    | 19446936 |
| 16 | rs2301814   | 68105171 | 14 | rs2236281  | 104000518 | 19 | rs1989867   | 19447470 |
| 16 | rs6499157   | 68105474 | 14 | rs7161305  | 104002234 | 19 | rs756999    | 19448200 |
| 16 | rs116670584 | 68106547 | 14 | rs9324063  | 104006693 | 19 | rs757000    | 19448301 |
| 16 | rs75421006  | 68106712 | 14 | rs7140558  | 104018651 | 19 | rs2965190   | 19451591 |
| 16 | rs3785108   | 68106846 | 14 | rs4906335  | 104021141 | 19 | rs2301668   | 19452249 |
| 16 | rs79422074  | 68106900 | 14 | rs7148456  | 104028270 | 19 | rs7250368   | 19452763 |
| 16 | rs74680231  | 68108898 | 14 | rs2296482  | 104029819 | 19 | rs2965191   | 19453521 |
| 16 | rs7188085   | 68113873 | 14 | rs12889403 | 104034746 | 19 | rs2301669   | 19453560 |
| 16 | rs74882119  | 68113972 | 14 | rs7140568  | 104041374 | 19 | rs2965193   | 19454828 |
| 16 | rs76501820  | 68114582 | 14 | rs8017993  | 104047734 | 19 | rs17751203  | 19455864 |
| 16 | rs1124993   | 68114626 | 14 | rs2403197  | 104053764 | 19 | rs35824797  | 19456264 |
| 16 | rs2107369   | 68116018 | 14 | rs8021368  | 104074810 | 19 | rs58489806  | 19456917 |
| 16 | rs3785109   | 68118311 | 14 | rs729438   | 104092789 | 19 | rs34858588  | 19457235 |
| 16 | rs3743735   | 68119555 | 14 | rs709400   | 104149475 | 19 | rs2905421   | 19457908 |
| 16 | rs78537727  | 68120606 | 14 | rs12432907 | 104168378 | 19 | rs968525    | 19459215 |
| 16 | rs75739761  | 68122914 | 14 | rs8548     | 104199580 | 19 | rs12982276  | 19459800 |
| 16 | rs74519164  | 68123086 | 14 | rs12886637 | 104222892 | 19 | rs73001065  | 19460541 |
| 16 | rs59708959  | 68123916 | 14 | rs722637   | 104261723 | 19 | rs2965194   | 19460702 |
| 16 | rs237834    | 68125316 | 14 | rs12883337 | 104264137 | 19 | rs2905422   | 19460703 |
| 16 | rs12446198  | 68125972 | 14 | rs4900597  | 104266664 | 19 | rs117949526 | 19462567 |
| 16 | rs75735284  | 68126635 | 15 | rs12901536 | 37425937  | 19 | rs11085261  | 19462606 |
| 16 | rs1074143   | 68127278 | 15 | rs2203929  | 37455975  | 19 | rs2965195   | 19463032 |
| 16 | rs12599178  | 68128104 | 15 | rs16954389 | 37494817  | 19 | rs9304960   | 19465529 |
| 16 | rs114329216 | 68129101 | 15 | rs1356779  | 37560789  | 19 | rs2301671   | 19466269 |
| 16 | rs74604428  | 68129638 | 15 | rs16964908 | 37638018  | 19 | rs62135557  | 19466293 |
| 16 | rs76595854  | 68130233 | 15 | rs4586385  | 37845804  | 19 | rs756997    | 19467085 |
| 16 | rs78961715  | 68131407 | 16 | rs955905   | 6065358   | 19 | rs2285626   | 19467545 |
| 16 | rs9932251   | 68131732 | 16 | rs8048168  | 6087895   | 19 | rs2285627   | 19467937 |
| 16 | rs7192187   | 68132109 | 16 | rs11641907 | 6102413   | 19 | rs2285628   | 19467996 |
| 16 | rs8058690   | 68136622 | 16 | rs6500744  | 6113661   | 19 | rs118029212 | 19468260 |

|    |             |          |    |            |         |    |             |          |
|----|-------------|----------|----|------------|---------|----|-------------|----------|
| 16 | rs72790386  | 68136932 | 16 | rs4360938  | 6116418 | 19 | rs2965196   | 19468525 |
| 16 | rs78479045  | 68137486 | 16 | rs929887   | 6121557 | 19 | rs13964     | 19468710 |
| 16 | rs117784871 | 68138091 | 16 | rs34151263 | 6123096 | 19 | rs15622     | 19468734 |
| 16 | rs151193115 | 68140780 | 16 | rs9927211  | 6124714 | 19 | rs10403731  | 19469296 |
| 16 | rs12447640  | 68150527 | 16 | rs12931744 | 6125544 | 19 | rs1985109   | 19469907 |
| 16 | rs12599880  | 68152035 | 16 | rs4124065  | 6128400 | 19 | rs2965198   | 19473030 |
| 16 | rs7205935   | 68152157 | 16 | rs2343519  | 6128520 | 19 | rs56255430  | 19477877 |
| 16 | rs73612690  | 68153200 | 16 | rs929889   | 6131347 | 19 | rs2905426   | 19478022 |
| 16 | rs74024145  | 68153382 | 16 | rs8052082  | 6131788 | 19 | rs2905427   | 19478023 |
| 16 | rs74333408  | 68153492 | 16 | rs4786811  | 6132787 | 19 | rs2965201   | 19478051 |
| 16 | rs76419201  | 68153553 | 16 | rs6500751  | 6132810 | 19 | rs59148799  | 19484008 |
| 16 | rs2418736   | 68154862 | 16 | rs17139340 | 6133414 | 19 | rs34277109  | 19487302 |
| 16 | rs12445396  | 68155121 | 16 | rs889701   | 6134669 | 19 | rs12973258  | 19488718 |
| 16 | rs118005841 | 68157562 | 16 | rs4786815  | 6135185 | 19 | rs2965180   | 19491973 |
| 16 | rs3815173   | 68160289 | 16 | rs9934817  | 6136219 | 19 | rs10406278  | 19494725 |
| 16 | rs73612697  | 68162016 | 16 | rs12928388 | 6136356 | 19 | rs62136975  | 19495652 |
| 16 | rs117922739 | 68163168 | 16 | rs889702   | 6139140 | 19 | rs2905435   | 19495954 |
| 16 | rs12597573  | 68167521 | 16 | rs9936351  | 6141379 | 19 | rs2965186   | 19497195 |
| 16 | rs74851284  | 68172568 | 16 | rs12927079 | 6142023 | 19 | rs1858999   | 19497669 |
| 16 | rs12597380  | 68172587 | 16 | rs7199064  | 6145849 | 19 | rs200738892 | 19498867 |
| 16 | rs116867512 | 68180834 | 16 | rs7197966  | 6146331 | 19 | rs117131852 | 19499589 |
| 16 | rs9922165   | 68181177 | 16 | rs8062784  | 6146634 | 19 | rs60321073  | 19499598 |
| 16 | rs9938553   | 68183064 | 16 | rs1424121  | 6146730 | 19 | rs17288409  | 19504167 |
| 16 | rs7193701   | 68185160 | 16 | rs8047363  | 6147082 | 19 | rs10415849  | 19505087 |
| 16 | rs114739995 | 68188464 | 16 | rs9806914  | 6147645 | 19 | rs10424702  | 19508013 |
| 16 | rs12446007  | 68189054 | 16 | rs7189501  | 6175429 | 19 | rs12462698  | 19510363 |
| 16 | rs8044995   | 68189340 | 16 | rs6500760  | 6180375 | 19 | rs2965181   | 19512317 |
| 16 | rs55725810  | 68189636 | 16 | rs17139480 | 6211906 | 19 | rs10408596  | 19512657 |
| 16 | rs117806247 | 68189730 | 16 | rs17139486 | 6214224 | 19 | rs2965179   | 19512755 |
| 16 | rs77884900  | 68190239 | 16 | rs12103273 | 6252217 | 19 | rs35156688  | 19514029 |
| 16 | rs8060893   | 68191608 | 16 | rs12924056 | 6267057 | 19 | rs118013132 | 19515562 |
| 16 | rs181018248 | 68192672 | 16 | rs17817199 | 6283228 | 19 | rs1000237   | 19518316 |
| 16 | rs117620519 | 68194889 | 16 | rs12444771 | 6300009 | 19 | rs2965189   | 19519518 |
| 16 | rs4359427   | 68202747 | 16 | rs4786847  | 6310233 | 19 | rs2916069   | 19520358 |
| 16 | rs185107840 | 68204790 | 16 | rs7206839  | 6318193 | 19 | rs182252596 | 19520536 |
| 16 | rs8046355   | 68205214 | 16 | rs2160166  | 6328022 | 19 | rs193098400 | 19522481 |
| 16 | rs118030546 | 68206660 | 16 | rs1420029  | 6377499 | 19 | rs2060276   | 19522491 |
| 16 | rs75796305  | 68208791 | 16 | rs10521041 | 6408915 | 19 | rs2965188   | 19522557 |
| 16 | rs12448677  | 68209741 | 16 | rs12447711 | 6411728 | 19 | rs2916070   | 19524105 |
| 16 | rs8044014   | 68209872 | 16 | rs11643342 | 6449389 | 19 | rs2916072   | 19525712 |
| 16 | rs8048034   | 68210604 | 16 | rs2109457  | 6450463 | 19 | rs2965185   | 19525792 |
| 16 | rs62057372  | 68211249 | 16 | rs8056982  | 6452536 | 19 | rs11436420  | 19526776 |
| 16 | rs28548264  | 68211321 | 16 | rs1860563  | 6478898 | 19 | rs2916073   | 19528324 |
| 16 | rs117240558 | 68212641 | 16 | rs9939300  | 6487958 | 19 | rs1469713   | 19528806 |
| 16 | rs75297764  | 68212820 | 16 | rs9939653  | 6488303 | 19 | rs1469712   | 19528821 |
| 16 | rs116883401 | 68213125 | 16 | rs4786869  | 6496333 | 19 | rs78150994  | 19530210 |
| 16 | rs74775711  | 68213680 | 16 | rs2024208  | 6497757 | 19 | rs2916074   | 19530270 |
| 16 | rs73612222  | 68216072 | 16 | rs17140313 | 6519332 | 19 | rs2916075   | 19530590 |



|    |             |          |    |            |          |    |             |          |
|----|-------------|----------|----|------------|----------|----|-------------|----------|
| 16 | rs7190307   | 68218336 | 16 | rs8060506  | 6523142  | 19 | rs11668386  | 19531910 |
| 16 | rs12445915  | 68218748 | 16 | rs878012   | 6531429  | 19 | rs2060275   | 19536208 |
| 16 | rs9932414   | 68219969 | 16 | rs809702   | 6548389  | 19 | rs8182472   | 19539891 |
| 16 | rs181812905 | 68220688 | 16 | rs17442167 | 6549889  | 19 | rs36113815  | 19540183 |
| 16 | rs7199588   | 68224582 | 16 | rs7404493  | 6552165  | 19 | rs113702251 | 19541147 |
| 16 | rs12598     | 68225515 | 16 | rs12449216 | 6553772  | 19 | rs11313442  | 19541787 |
| 16 | rs1125332   | 68227780 | 16 | rs12449258 | 7433021  | 19 | rs34498230  | 19544403 |
| 16 | rs74692270  | 68227973 | 16 | rs11640126 | 7473895  | 19 | rs4808199   | 19545099 |
| 16 | rs1125331   | 68228119 | 16 | rs4787016  | 7476725  | 19 | rs2965184   | 19545428 |
| 16 | rs55757502  | 68228427 | 16 | rs1034983  | 7492515  | 19 | rs113564583 | 19545642 |
| 16 | rs114645460 | 68238511 | 16 | rs2109437  | 7493024  | 19 | rs2965183   | 19545696 |
| 16 | rs113502835 | 68238965 | 16 | rs11077189 | 7535158  | 19 | rs2916076   | 19545990 |
| 16 | rs6499162   | 68239460 | 16 | rs12929155 | 7535379  | 19 | rs4808951   | 19550306 |
| 16 | rs6499163   | 68243486 | 16 | rs8059548  | 7538252  | 19 | rs76801207  | 19550696 |
| 16 | rs1073632   | 68248607 | 16 | rs3785267  | 7574054  | 19 | rs80200208  | 19554725 |
| 16 | rs9938020   | 68251784 | 16 | rs17676059 | 7574482  | 19 | rs4808200   | 19554803 |
| 16 | rs117992789 | 68253882 | 16 | rs1507023  | 7588435  | 19 | rs76761722  | 19557965 |
| 16 | rs117410267 | 68256622 | 16 | rs17677211 | 7594064  | 19 | rs8105642   | 19558468 |
| 16 | rs9931987   | 68256639 | 16 | rs4786182  | 7595701  | 19 | rs8110250   | 19559989 |
| 16 | rs12598630  | 68258852 | 16 | rs17144090 | 7597891  | 19 | rs8110171   | 19560063 |
| 16 | rs8056649   | 68260083 | 16 | rs6500986  | 7613177  | 19 | rs12971734  | 19562253 |
| 16 | rs11043     | 68262958 | 16 | rs12444690 | 7666200  | 19 | rs10414830  | 19562332 |
| 16 | rs8057119   | 68268836 | 16 | rs3785233  | 7667510  | 19 | rs12972397  | 19562349 |
| 16 | rs141865143 | 68269479 | 16 | rs10492763 | 7669594  | 19 | rs1560687   | 19562902 |
| 16 | rs7184821   | 68270229 | 16 | rs758491   | 7681778  | 19 | rs4808957   | 19567248 |
| 16 | rs117571960 | 68271261 | 16 | rs17144422 | 7690419  | 19 | rs12977524  | 19568244 |
| 16 | rs7187202   | 68273895 | 16 | rs17144509 | 7709203  | 19 | rs4808203   | 19568659 |
| 16 | rs3826164   | 68280317 | 16 | rs740676   | 7712416  | 19 | rs75582668  | 19569023 |
| 16 | rs1971546   | 68280893 | 16 | rs17135054 | 7713728  | 19 | rs74322277  | 19570428 |
| 16 | rs10500543  | 68281311 | 16 | rs763650   | 7729221  | 19 | rs58074958  | 19570555 |
| 16 | rs12444188  | 68282077 | 16 | rs917543   | 7743747  | 19 | rs7250658   | 19571100 |
| 16 | rs117958985 | 68283976 | 16 | rs1014125  | 7781985  | 19 | rs4808958   | 19571752 |
| 16 | rs1975802   | 68285847 | 16 | rs1024647  | 7792248  | 19 | rs4808959   | 19572108 |
| 16 | rs17688065  | 68286002 | 16 | rs1024646  | 7792414  | 19 | rs28720066  | 19572220 |
| 16 | rs116886316 | 68286291 | 16 | rs2967569  | 7812952  | 19 | rs4808960   | 19574277 |
| 16 | rs2290700   | 68288983 | 16 | rs2907359  | 7817528  | 19 | rs200232664 | 19575945 |
| 16 | rs200107219 | 68289059 | 16 | rs2967557  | 7818955  | 19 | rs2163804   | 19575965 |
| 16 | rs8062085   | 68289313 | 16 | rs3111558  | 7831214  | 19 | rs4808961   | 19577215 |
| 16 | rs12446418  | 68290200 | 16 | rs3112738  | 7834885  | 19 | rs2099334   | 19578450 |
| 16 | rs117793858 | 68291767 | 16 | rs4238884  | 7840181  | 19 | rs754256    | 19578591 |
| 16 | rs7672      | 68294800 | 16 | rs4456518  | 7860392  | 19 | rs73002956  | 19578743 |
| 16 | rs2863981   | 68295598 | 16 | rs12931037 | 7861208  | 19 | rs754255    | 19578890 |
| 16 | rs9888986   | 68297228 | 16 | rs4620976  | 7873825  | 19 | rs10405625  | 19579046 |
| 16 | rs9888796   | 68297589 | 16 | rs11077231 | 7874445  | 19 | rs4808962   | 19579557 |
| 16 | rs12447119  | 68297928 | 16 | rs13337565 | 7876317  | 19 | rs6511036   | 19582651 |
| 16 | rs12102971  | 68298024 | 16 | rs4290490  | 7885694  | 19 | rs73002960  | 19582992 |
| 16 | rs12162068  | 68298193 | 16 | rs4608356  | 7915055  | 19 | rs17684098  | 19584969 |
| 16 | rs116580887 | 68299502 | 16 | rs11075148 | 12829006 | 19 | rs747050    | 19584987 |

|    |             |          |    |             |          |    |             |          |
|----|-------------|----------|----|-------------|----------|----|-------------|----------|
| 16 | rs117417273 | 68299697 | 16 | rs11075151  | 12834880 | 19 | rs56280531  | 19585788 |
| 16 | rs12596500  | 68299771 | 16 | rs7190046   | 12839092 | 19 | rs1465695   | 19588546 |
| 16 | rs77517043  | 68301410 | 16 | rs12446662  | 12859891 | 19 | rs148037950 | 19590022 |
| 16 | rs72790400  | 68301727 | 16 | rs4780476   | 12862007 | 19 | rs75260583  | 19590232 |
| 16 | rs9933029   | 68303410 | 16 | rs8045393   | 12864070 | 19 | rs118182642 | 19597026 |
| 16 | rs185291585 | 68304116 | 16 | rs4536458   | 12871639 | 19 | rs10419912  | 19597055 |
| 16 | rs8056893   | 68304392 | 16 | rs4513082   | 12878592 | 19 | rs2315610   | 19597240 |
| 16 | rs78131538  | 68305712 | 16 | rs2060360   | 12888567 | 19 | rs77157813  | 19598611 |
| 16 | rs9935025   | 68307447 | 16 | rs4238618   | 12946129 | 19 | rs77653002  | 19599389 |
| 16 | rs9937244   | 68307559 | 16 | rs11644362  | 12994097 | 19 | rs79879961  | 19599742 |
| 16 | rs4783552   | 68310312 | 16 | rs11075174  | 13020416 | 19 | rs118013768 | 19602760 |
| 16 | rs112086775 | 68310917 | 16 | rs7499101   | 13032136 | 19 | rs751858    | 19602821 |
| 17 | rs2281727   | 2117945  | 16 | rs961946    | 13033361 | 19 | rs751857    | 19602873 |
| 17 | rs143499    | 2132324  | 16 | rs6498368   | 13050541 | 19 | rs751856    | 19602945 |
| 17 | rs7217226   | 2136065  | 16 | rs7192086   | 13061611 | 19 | rs4808964   | 19603692 |
| 17 | rs10852932  | 2143460  | 16 | rs251921    | 13202828 | 19 | rs11671253  | 19604206 |
| 17 | rs34166400  | 2146392  | 16 | rs11075184  | 13279908 | 19 | rs2288852   | 19605348 |
| 17 | rs170040    | 2165714  | 16 | rs12922227  | 13302210 | 19 | rs1047361   | 19606634 |
| 17 | rs170041    | 2170216  | 16 | rs149228    | 13304474 | 19 | rs73002973  | 19606848 |
| 17 | rs216196    | 2202943  | 16 | rs1549292   | 71983664 | 19 | rs6511038   | 19607564 |
| 17 | rs391300    | 2216258  | 16 | rs7204708   | 71986946 | 20 | rs2425656   | 43506247 |
| 17 | rs12951376  | 17752809 | 16 | rs16973520  | 71996291 | 20 | rs6017444   | 43528521 |
| 17 | rs7503334   | 17779458 | 16 | rs8053891   | 71997789 | 20 | rs12031     | 43561660 |
| 17 | rs4299203   | 17878159 | 16 | rs28714527  | 71997862 | 20 | rs17322289  | 43599951 |
| 17 | rs7219320   | 17880877 | 16 | rs148461313 | 71998016 | 20 | rs11477080  | 43670340 |
| 17 | rs2955377   | 17932818 | 16 | rs4788587   | 72001136 | 20 | rs6031972   | 43704943 |
| 17 | rs2955383   | 17941364 | 16 | rs9930930   | 72001971 | 20 | rs734784    | 43723627 |
| 17 | rs16960835  | 17960011 | 16 | rs35800852  | 72002105 | 20 | rs962550    | 43725727 |
| 17 | rs854764    | 18011750 | 16 | rs11644740  | 72002308 | 20 | rs6032006   | 43755053 |
| 18 | rs4131791   | 52747871 | 16 | rs35259348  | 72003952 | 20 | rs17423416  | 43758144 |
| 18 | rs4309482   | 52750469 | 16 | rs8055242   | 72006882 | 20 | rs17332620  | 43777506 |
| 18 | rs11874716  | 52750688 | 16 | rs7197967   | 72007232 | 20 | rs13037651  | 43782230 |
| 18 | rs12966547  | 52752017 | 16 | rs9925415   | 72007399 | 20 | rs6032029   | 43786064 |
| 18 | rs8092679   | 53034140 | 16 | rs34972708  | 72008225 | 20 | rs979641    | 43786336 |
| 18 | rs1660241   | 53035650 | 16 | rs10597344  | 72008826 | 20 | rs2868237   | 43794189 |
| 18 | rs1788030   | 53045198 | 16 | rs12931964  | 72009676 | 20 | rs17424696  | 43810734 |
| 18 | rs1788025   | 53048678 | 16 | rs11405422  | 72009857 | 20 | rs6032044   | 43819416 |
| 18 | rs9646596   | 53049212 | 16 | rs1559401   | 72011181 | 20 | rs7344269   | 43828668 |
| 18 | rs17594526  | 53058238 | 16 | rs1559399   | 72011261 | 20 | rs6017511   | 43833132 |
| 18 | rs17594665  | 53063719 | 16 | rs77282701  | 72011439 | 20 | rs13037087  | 43834313 |
| 18 | rs17089778  | 53065342 | 16 | rs78529492  | 72011610 | 20 | rs6017519   | 43854677 |
| 18 | rs17594721  | 53065892 | 16 | rs7185272   | 72013797 | 20 | rs2868240   | 43874039 |
| 18 | rs11152369  | 53066328 | 16 | rs72803749  | 72014322 | 20 | rs4522674   | 43893276 |
| 18 | rs17509991  | 53067184 | 16 | rs7191900   | 72014866 | 20 | rs13039345  | 43895932 |
| 18 | rs2958175   | 53074958 | 16 | rs8063499   | 72016906 | 20 | rs991048    | 43898227 |
| 18 | rs10503001  | 53075696 | 16 | rs117115894 | 72017084 | 20 | rs6017530   | 43899731 |
| 18 | rs2919450   | 53084545 | 16 | rs72803753  | 72017437 | 20 | rs6032087   | 43902305 |
| 18 | rs4500831   | 53097544 | 16 | rs7187692   | 72017495 | 20 | rs17335251  | 43902946 |

|    |             |          |    |             |          |    |           |          |
|----|-------------|----------|----|-------------|----------|----|-----------|----------|
| 18 | rs12963463  | 53099093 | 16 | rs12935551  | 72017562 | 20 | rs6017532 | 43904095 |
| 18 | rs4468713   | 53104019 | 16 | rs10492825  | 72018417 | 20 | rs6104092 | 43906730 |
| 18 | rs10503002  | 53109202 | 16 | rs10492824  | 72018771 | 20 | rs6104093 | 43908297 |
| 18 | rs12606995  | 53121576 | 16 | rs10492823  | 72018860 | 20 | rs7272524 | 43908694 |
| 18 | rs732779    | 53123172 | 16 | rs4788589   | 72019948 | 20 | rs6032095 | 43913255 |
| 18 | rs2924321   | 53125435 | 16 | rs12708923  | 72020134 | 20 | rs761367  | 43913317 |
| 18 | rs1377243   | 53134652 | 16 | rs4788590   | 72020294 | 20 | rs2743330 | 43919704 |
| 18 | rs8090422   | 53146896 | 16 | rs4788591   | 72020323 | 20 | rs2743334 | 43919745 |
| 18 | rs9960767   | 53155002 | 16 | rs9927968   | 72021767 | 20 | rs2743246 | 43928698 |
| 18 | rs2060889   | 53159541 | 16 | rs12051425  | 72021962 | 20 | rs2743283 | 43931096 |
| 18 | rs17596974  | 53166557 | 16 | rs150143219 | 72021980 |    |           |          |
| 18 | rs2958158   | 53172105 | 16 | rs9938025   | 72022041 |    |           |          |
| 18 | rs13313612  | 53458908 | 16 | rs889545    | 72022065 |    |           |          |
| 18 | rs6650723   | 53524269 | 16 | rs12600121  | 72022454 |    |           |          |
| 18 | rs17201415  | 53780234 | 16 | rs12600132  | 72022534 |    |           |          |
| 19 | rs8105094   | 19374061 | 16 | rs12051517  | 72022866 |    |           |          |
| 19 | rs8105984   | 19374068 | 16 | rs4788592   | 72022941 |    |           |          |
| 19 | rs35854118  | 19375372 | 16 | rs9925967   | 72024846 |    |           |          |
| 19 | rs78538967  | 19375822 | 16 | rs12927205  | 72025077 |    |           |          |
| 19 | rs2074298   | 19377716 | 16 | rs7204798   | 72025429 |    |           |          |
| 19 | rs117877390 | 19378416 | 16 | rs4788595   | 72025759 |    |           |          |
| 19 | rs998732    | 19378671 | 16 | rs10852510  | 72026041 |    |           |          |
| 19 | rs58542926  | 19379549 | 16 | rs11075912  | 72026554 |    |           |          |
| 19 | rs72999063  | 19380596 | 16 | rs7191148   | 72027191 |    |           |          |
| 19 | rs2074299   | 19380646 | 16 | rs192541717 | 72027321 |    |           |          |
| 19 | rs72999068  | 19380685 | 16 | rs7195072   | 72027579 |    |           |          |
| 19 | rs12974359  | 19381439 | 16 | rs17664900  | 72027611 |    |           |          |
| 19 | rs2074301   | 19381715 | 16 | rs34156336  | 72028062 |    |           |          |
| 19 | rs2074303   | 19381755 | 16 | rs79217285  | 72028079 |    |           |          |
| 19 | rs116904583 | 19382215 | 16 | rs34150651  | 72028112 |    |           |          |
| 19 | rs55822665  | 19383298 | 16 | rs72787018  | 72028200 |    |           |          |
| 19 | rs10419245  | 19383755 | 16 | rs35697801  | 72028220 |    |           |          |
| 19 | rs78640921  | 19384914 | 16 | rs12919469  | 72028612 |    |           |          |
| 19 | rs11669578  | 19385080 | 16 | rs7191717   | 72029303 |    |           |          |
| 19 | rs735273    | 19385411 | 16 | rs12920844  | 72029304 |    |           |          |
| 19 | rs8103496   | 19386015 | 16 | rs62055599  | 72029797 |    |           |          |
| 19 | rs74182631  | 19386738 | 16 | rs7197883   | 72030072 |    |           |          |
| 19 | rs2017964   | 19387149 | 16 | rs72787021  | 72030688 |    |           |          |
| 19 | rs757346    | 19387185 | 16 | rs72787023  | 72031105 |    |           |          |
| 19 | rs2010506   | 19387356 | 16 | rs78534681  | 72031172 |    |           |          |
| 19 | rs2074550   | 19387743 | 16 | rs1035559   | 72031860 |    |           |          |
| 19 | rs2074551   | 19388057 | 16 | rs72787025  | 72031865 |    |           |          |
| 19 | rs17750998  | 19388446 | 16 | rs16973585  | 72032231 |    |           |          |
| 19 | rs17683766  | 19388888 | 16 | rs1035560   | 72032730 |    |           |          |
| 19 | rs11555053  | 19390185 | 16 | rs17588429  | 72032751 |    |           |          |
| 19 | rs2301784   | 19390749 | 16 | rs60493669  | 72033580 |    |           |          |
| 19 | rs6511026   | 19391402 | 16 | rs72787027  | 72033801 |    |           |          |
| 19 | rs11671506  | 19391838 | 16 | rs7185601   | 72035082 |    |           |          |

|    |             |          |    |             |          |
|----|-------------|----------|----|-------------|----------|
| 19 | rs6511027   | 19391851 | 16 | rs7186207   | 72035359 |
| 19 | rs2269873   | 19392401 | 16 | rs74343175  | 72035477 |
| 19 | rs2023882   | 19405405 | 16 | rs8051239   | 72036257 |
| 19 | rs2023883   | 19405480 | 16 | rs7195958   | 72036577 |
| 19 | rs74182633  | 19406707 | 16 | rs4788454   | 72037206 |
| 19 | rs12979148  | 19406869 | 16 | rs929866    | 72038363 |
| 19 | rs10401969  | 19407718 | 16 | rs2012817   | 72038659 |
| 19 | rs2301785   | 19408164 | 16 | rs56051977  | 72039207 |
| 19 | rs4808939   | 19410480 | 16 | rs1820249   | 72039446 |
| 19 | rs2315022   | 19413381 | 16 | rs1820248   | 72039605 |
| 19 | rs2315023   | 19413393 | 16 | rs9929256   | 72040032 |
| 19 | rs114573949 | 19414379 | 16 | rs34596355  | 72040791 |
| 19 | rs3752201   | 19415628 | 16 | rs3213419   | 72042428 |
| 19 | rs1010207   | 19416045 | 16 | rs34270657  | 72042635 |
| 19 | rs117109209 | 19417145 | 16 | rs3213422   | 72042682 |
| 19 | rs76944848  | 19417512 | 16 | rs4788597   | 72043039 |
| 19 | rs4808943   | 19420840 | 16 | rs4788598   | 72044238 |
| 19 | rs1859287   | 19422187 | 16 | rs2878404   | 72045186 |
| 19 | rs113189294 | 19423086 | 16 | rs8057016   | 72046211 |
| 19 | rs11668104  | 19426181 | 16 | rs1465457   | 72046268 |
| 19 | rs80146298  | 19426317 | 16 | rs8058214   | 72046305 |
| 19 | rs2315025   | 19426609 | 16 | rs8061140   | 72046461 |
| 19 | rs8108647   | 19427623 | 16 | rs752434    | 72047170 |
| 19 | rs3934667   | 19431423 | 16 | rs4788456   | 72047286 |
| 19 | rs4539728   | 19431480 | 16 | rs4788600   | 72048080 |
| 19 | rs12460764  | 19431963 | 16 | rs3764310   | 72048332 |
| 19 | rs117924058 | 19432416 | 16 | rs8062895   | 72048632 |
| 19 | rs4808194   | 19435680 | 16 | rs7184117   | 72049212 |
| 19 | rs4239639   | 19435876 | 16 | rs3812988   | 72049621 |
| 19 | rs7247309   | 19439631 | 16 | rs11864453  | 72050480 |
| 19 | rs3764567   | 19440066 | 16 | rs75329497  | 72052299 |
| 19 | rs1009136   | 19440428 | 16 | rs11648003  | 72052348 |
| 19 | rs12985655  | 19442434 | 16 | rs10048111  | 72053141 |
| 19 | rs17751109  | 19443334 | 16 | rs1862752   | 72054984 |
| 19 | rs10640109  | 19443406 | 16 | rs2081223   | 72055532 |
| 19 | rs8103197   | 19443466 | 16 | rs12446480  | 72056757 |
| 19 | rs74980519  | 19443968 | 16 | rs2288002   | 72057282 |
| 19 | rs117923614 | 19443986 | 16 | rs61733129  | 72057421 |
| 19 | rs11085259  | 19445856 | 16 | rs2288000   | 72058881 |
| 19 | rs12463074  | 19445869 | 16 | rs113383183 | 72059556 |
| 19 | rs769267    | 19446936 | 16 | rs55684229  | 72062019 |
| 19 | rs1989867   | 19447470 | 16 | rs190425537 | 72062357 |
| 19 | rs756999    | 19448200 | 16 | rs2550868   | 72066072 |
| 19 | rs757000    | 19448301 | 16 | rs72787038  | 72066102 |
| 19 | rs2965190   | 19451591 | 16 | rs74386648  | 72066442 |
| 19 | rs2301668   | 19452249 | 16 | rs12925078  | 72067263 |
| 19 | rs7250368   | 19452763 | 16 | rs2550043   | 72067491 |
| 19 | rs2965191   | 19453521 | 16 | rs117365732 | 72069740 |

|    |             |          |    |             |          |
|----|-------------|----------|----|-------------|----------|
| 19 | rs2301669   | 19453560 | 16 | rs79635500  | 72069966 |
| 19 | rs2965193   | 19454828 | 16 | rs2550870   | 72070129 |
| 19 | rs17751203  | 19455864 | 16 | rs182238023 | 72070574 |
| 19 | rs35824797  | 19456264 | 16 | rs188036452 | 72070575 |
| 19 | rs58489806  | 19456917 | 16 | rs251033    | 72073122 |
| 19 | rs34858588  | 19457235 | 16 | rs9932951   | 72075341 |
| 19 | rs2905421   | 19457908 | 16 | rs76809174  | 72076668 |
| 19 | rs968525    | 19459215 | 16 | rs12930702  | 72077000 |
| 19 | rs12982276  | 19459800 | 16 | rs763665    | 72078043 |
| 19 | rs73001065  | 19460541 | 16 | rs76057084  | 72078485 |
| 19 | rs2965194   | 19460702 | 16 | rs1424241   | 72078907 |
| 19 | rs2905422   | 19460703 | 16 | rs35283911  | 72078990 |
| 19 | rs117949526 | 19462567 | 16 | rs7197453   | 72079127 |
| 19 | rs11085261  | 19462606 | 16 | rs72787046  | 72079342 |
| 19 | rs2965195   | 19463032 | 16 | rs8182213   | 72080005 |
| 19 | rs9304960   | 19465529 | 16 | rs113530185 | 72080802 |
| 19 | rs2301671   | 19466269 | 16 | rs9924964   | 72085561 |
| 19 | rs62135557  | 19466293 | 16 | rs5467      | 72088280 |
| 19 | rs756997    | 19467085 | 16 | rs5468      | 72088331 |
| 19 | rs2285626   | 19467545 | 16 | rs8062041   | 72088964 |
| 19 | rs2285627   | 19467937 | 16 | rs12917999  | 72089451 |
| 19 | rs2285628   | 19467996 | 16 | rs2070937   | 72089740 |
| 19 | rs118029212 | 19468260 | 16 | rs5475      | 72094348 |
| 19 | rs2965196   | 19468525 | 16 | rs34682685  | 72096227 |
| 19 | rs13964     | 19468710 | 16 | rs7189115   | 72098952 |
| 19 | rs15622     | 19468734 | 16 | rs7188962   | 72098962 |
| 19 | rs10403731  | 19469296 | 16 | rs7190994   | 72099241 |
| 19 | rs1985109   | 19469907 | 16 | rs34042070  | 72101525 |
| 19 | rs2965198   | 19473030 | 16 | rs79469260  | 72103769 |
| 19 | rs56255430  | 19477877 | 16 | rs79679679  | 72104835 |
| 19 | rs2905426   | 19478022 | 16 | rs72787058  | 72105084 |
| 19 | rs2905427   | 19478023 | 16 | rs152838    | 72105702 |
| 19 | rs2965201   | 19478051 | 16 | rs11642506  | 72107865 |
| 19 | rs59148799  | 19484008 | 16 | rs2000999   | 72108093 |
| 19 | rs34277109  | 19487302 | 16 | rs11646364  | 72108687 |
| 19 | rs12973258  | 19488718 | 16 | rs55741258  | 72112480 |
| 19 | rs2965180   | 19491973 | 16 | rs74029810  | 72113345 |
| 19 | rs10406278  | 19494725 | 16 | rs2550035   | 72113416 |
| 19 | rs62136975  | 19495652 | 16 | rs117596524 | 72113914 |
| 19 | rs2905435   | 19495954 | 16 | rs217181    | 72114002 |
| 19 | rs2965186   | 19497195 | 16 | rs74029814  | 72114715 |
| 19 | rs1858999   | 19497669 | 16 | rs2854956   | 72115238 |
| 19 | rs200738892 | 19498867 | 16 | rs8059437   | 72116467 |
| 19 | rs74604097  | 19499549 | 16 | rs56901884  | 72117823 |
| 19 | rs117131852 | 19499589 | 16 | rs117783250 | 72119422 |
| 19 | rs60321073  | 19499598 | 16 | rs61282680  | 72119628 |
| 19 | rs17288409  | 19504167 | 16 | rs78310258  | 72120958 |
| 19 | rs10415849  | 19505087 | 16 | rs62055637  | 72121265 |

|    |             |          |    |             |          |
|----|-------------|----------|----|-------------|----------|
| 19 | rs10424702  | 19508013 | 16 | rs78873516  | 72121487 |
| 19 | rs12462698  | 19510363 | 16 | rs10492813  | 72122463 |
| 19 | rs2965181   | 19512317 | 16 | rs12708925  | 72122706 |
| 19 | rs10408596  | 19512657 | 16 | rs74644576  | 72122761 |
| 19 | rs2965179   | 19512755 | 16 | rs116949987 | 72123423 |
| 19 | rs35156688  | 19514029 | 16 | rs152828    | 72123886 |
| 19 | rs118013132 | 19515562 | 16 | rs7191127   | 72123992 |
| 19 | rs1000237   | 19518316 | 16 | rs7190995   | 72124157 |
| 19 | rs2965189   | 19519518 | 16 | rs7192730   | 72124219 |
| 19 | rs2916069   | 19520358 | 16 | rs2303285   | 72124495 |
| 19 | rs182252596 | 19520536 | 16 | rs146137507 | 72124787 |
| 19 | rs193098400 | 19522481 | 16 | rs3764311   | 72125617 |
| 19 | rs2060276   | 19522491 | 16 | rs3764312   | 72125733 |
| 19 | rs2965188   | 19522557 | 16 | rs10492814  | 72126514 |
| 19 | rs2916070   | 19524105 | 16 | rs3764314   | 72127078 |
| 19 | rs2916072   | 19525712 | 16 | rs7194397   | 72128299 |
| 19 | rs2965185   | 19525792 | 16 | rs12924413  | 72129745 |
| 19 | rs11436420  | 19526776 | 16 | rs35794819  | 72130103 |
| 19 | rs2916073   | 19528324 | 16 | rs11554764  | 72130125 |
| 19 | rs1469713   | 19528806 | 16 | rs1050361   | 72130203 |
| 19 | rs1469712   | 19528821 | 16 | rs9926927   | 72130556 |
| 19 | rs78150994  | 19530210 | 16 | rs1050362   | 72130815 |
| 19 | rs2916074   | 19530270 | 16 | rs17590101  | 72132048 |
| 19 | rs2916075   | 19530590 | 16 | rs6499559   | 72132064 |
| 19 | rs11668386  | 19531910 | 16 | rs11862813  | 72132356 |
| 19 | rs2060275   | 19536208 | 16 | rs2072142   | 72132713 |
| 19 | rs8182472   | 19539891 | 16 | rs17287146  | 72133789 |
| 19 | rs36113815  | 19540183 | 16 | rs2269918   | 72134831 |
| 19 | rs113702251 | 19541147 | 16 | rs1050363   | 72135014 |
| 19 | rs11313442  | 19541787 | 16 | rs8043606   | 72135319 |
| 19 | rs34498230  | 19544403 | 16 | rs9932062   | 72136055 |
| 19 | rs4808199   | 19545099 | 16 | rs61060922  | 72136154 |
| 19 | rs2965184   | 19545428 | 16 | rs2074627   | 72136769 |
| 19 | rs113564583 | 19545642 | 16 | rs12708928  | 72137227 |
| 19 | rs2965183   | 19545696 | 16 | rs2240243   | 72137561 |
| 19 | rs2916076   | 19545990 | 16 | rs12325142  | 72138112 |
| 19 | rs4808951   | 19550306 | 16 | rs2074626   | 72139184 |
| 19 | rs76801207  | 19550696 | 16 | rs150617    | 72139396 |
| 19 | rs80200208  | 19554725 | 16 | rs55772151  | 72139667 |
| 19 | rs4808200   | 19554803 | 16 | rs118168140 | 72139689 |
| 19 | rs76761722  | 19557965 | 16 | rs58152051  | 72140338 |
| 19 | rs8105642   | 19558468 | 16 | rs36033103  | 72142038 |
| 19 | rs8110250   | 19559989 | 16 | rs8051882   | 72142072 |
| 19 | rs8110171   | 19560063 | 16 | rs9925763   | 72142595 |
| 19 | rs12971734  | 19562253 | 16 | rs9302635   | 72144174 |
| 19 | rs10414830  | 19562332 | 16 | rs2241412   | 72144284 |
| 19 | rs12972397  | 19562349 | 16 | rs7940      | 72146441 |
| 19 | rs1560687   | 19562902 | 16 | rs187003456 | 72147186 |

|    |             |          |    |            |          |
|----|-------------|----------|----|------------|----------|
| 19 | rs4808957   | 19567248 | 16 | rs12448315 | 72147242 |
| 19 | rs12977524  | 19568244 | 16 | rs17667053 | 72147431 |
| 19 | rs4808203   | 19568659 | 16 | rs7184169  | 72152933 |
| 19 | rs75582668  | 19569023 | 16 | rs4788460  | 72154509 |
| 19 | rs74322277  | 19570428 | 16 | rs17604185 | 72194763 |
| 19 | rs58074958  | 19570555 | 16 | rs12927014 | 72207843 |
| 19 | rs7250658   | 19571100 | 16 | rs17604676 | 72221984 |
| 19 | rs4808958   | 19571752 | 16 | rs16970670 | 72225187 |
| 19 | rs4808959   | 19572108 | 16 | rs7203307  | 72235076 |
| 19 | rs28720066  | 19572220 | 16 | rs12447857 | 72237535 |
| 19 | rs4808960   | 19574277 | 16 | rs8060878  | 72243624 |
| 19 | rs200232664 | 19575945 | 16 | rs7187517  | 72250217 |
| 19 | rs2163804   | 19575965 | 16 | rs811054   | 72251132 |
| 19 | rs4808961   | 19577215 | 16 | rs9938506  | 72252752 |
| 19 | rs2099334   | 19578450 | 16 | rs12934528 | 72256903 |
| 19 | rs754256    | 19578591 | 16 | rs811049   | 72260046 |
| 19 | rs73002956  | 19578743 | 16 | rs4238965  | 72283147 |
| 19 | rs754255    | 19578890 | 16 | rs11646048 | 72291732 |
| 19 | rs10405625  | 19579046 | 16 | rs16970751 | 72297706 |
| 19 | rs4808962   | 19579557 | 16 | rs7191673  | 72308631 |
| 19 | rs6511036   | 19582651 | 16 | rs12921986 | 72312727 |
| 19 | rs73002960  | 19582992 | 16 | rs9930344  | 72381557 |
| 19 | rs17684098  | 19584969 | 16 | rs7193859  | 72400879 |
| 19 | rs747050    | 19584987 | 16 | rs2336438  | 72409698 |
| 19 | rs56280531  | 19585788 | 16 | rs806742   | 72432949 |
| 19 | rs1465695   | 19588546 | 16 | rs806739   | 72437741 |
| 19 | rs148037950 | 19590022 | 17 | rs7220474  | 27341434 |
| 19 | rs75260583  | 19590232 | 17 | rs1844754  | 27341776 |
| 19 | rs118182642 | 19597026 | 17 | rs997996   | 27351320 |
| 19 | rs10419912  | 19597055 | 17 | rs7212295  | 27431425 |
| 19 | rs2315610   | 19597240 | 17 | rs2279959  | 27437208 |
| 19 | rs77157813  | 19598611 | 17 | rs8076604  | 27438469 |
| 19 | rs77653002  | 19599389 | 17 | rs882729   | 27449976 |
| 19 | rs79879961  | 19599742 | 17 | rs6505114  | 27499140 |
| 19 | rs118013768 | 19602760 | 17 | rs11080090 | 27502029 |
| 19 | rs751858    | 19602821 | 17 | rs9906043  | 27504921 |
| 19 | rs751857    | 19602873 | 17 | rs9906526  | 27555828 |
| 19 | rs751856    | 19602945 | 17 | rs9303624  | 27562990 |
| 19 | rs4808964   | 19603692 | 17 | rs7224755  | 27567793 |
| 19 | rs11671253  | 19604206 | 17 | rs2041156  | 27568780 |
| 19 | rs2288852   | 19605348 | 17 | rs16964949 | 27582578 |
| 19 | rs1047361   | 19606634 | 17 | rs8614     | 27588806 |
| 19 | rs73002973  | 19606848 | 17 | rs2429244  | 27597286 |
| 19 | rs6511038   | 19607564 | 17 | rs16964963 | 27603316 |
| 19 | rs10402451  | 19608537 | 17 | rs797973   | 27647630 |
| 19 | rs3794990   | 19610030 | 17 | rs11867749 | 27658233 |
| 19 | rs3794991   | 19610596 | 17 | rs11653144 | 27675226 |
| 19 | rs3794993   | 19611550 | 17 | rs7222766  | 27679725 |

|    |             |          |    |            |          |
|----|-------------|----------|----|------------|----------|
| 19 | rs7259773   | 19611774 | 17 | rs1400790  | 27696371 |
| 19 | rs892021    | 19613480 | 17 | rs2138852  | 27703349 |
| 19 | rs57009615  | 19613622 | 17 | rs12938678 | 27710427 |
| 19 | rs79370636  | 19614289 | 17 | rs8076739  | 27714587 |
| 19 | rs78010159  | 19615905 | 17 | rs9900684  | 27732942 |
| 19 | rs3752151   | 19616026 | 17 | rs1568373  | 27760143 |
| 19 | rs1063966   | 19616742 | 17 | rs9900280  | 27769598 |
| 19 | rs1054284   | 19616953 | 17 | rs17225878 | 27779438 |
| 19 | rs34667451  | 19617017 | 17 | rs771428   | 27793559 |
| 19 | rs2033481   | 19617134 | 17 | rs12601608 | 27800863 |
| 19 | rs41313155  | 19617655 | 17 | rs508369   | 27801070 |
| 19 | rs1054308   | 19617656 | 17 | rs6505138  | 27809104 |
| 19 | rs10282     | 19619317 | 18 | rs2861863  | 36633908 |
| 19 | rs6909      | 19619542 | 18 | rs4239424  | 36763264 |
| 19 | rs17655544  | 19620300 | 18 | rs12456709 | 36779973 |
| 19 | rs180818546 | 19620460 | 18 | rs9966656  | 36876506 |
| 19 | rs34183201  | 19621389 | 18 | rs2163544  | 36885075 |
| 19 | rs11085264  | 19621780 | 18 | rs10502722 | 36886378 |
| 19 | rs7250893   | 19625547 | 18 | rs16971807 | 36898689 |
| 19 | rs80007081  | 19626734 | 18 | rs9304205  | 36899968 |
| 19 | rs17684164  | 19626769 | 18 | rs12964741 | 36905627 |
| 19 | rs77254326  | 19626781 | 18 | rs1431702  | 36910969 |
| 19 | rs16996127  | 19627310 | 18 | rs1367836  | 36934371 |
| 19 | rs7252888   | 19628037 | 18 | rs2849762  | 36966260 |
| 19 | rs78883953  | 19630002 | 18 | rs1030593  | 50374155 |
| 19 | rs7250233   | 19630948 | 18 | rs7506794  | 50375592 |
| 19 | rs4808965   | 19631655 | 18 | rs4384683  | 50379032 |
| 19 | rs11669010  | 19632378 | 18 | rs7234775  | 50426610 |
| 19 | rs113611839 | 19634000 | 18 | rs1943121  | 50445517 |
| 19 | rs78176666  | 19636702 | 18 | rs16956268 | 50695211 |
| 19 | rs111406321 | 19637437 | 18 | rs10502962 | 50711414 |
| 19 | rs75453386  | 19637781 | 18 | rs8084351  | 50726559 |
| 19 | rs73002997  | 19637793 | 18 | rs8098405  | 50752373 |
| 19 | rs75525243  | 19638218 | 18 | rs1451949  | 52290083 |
| 19 | rs45631651  | 19638743 | 18 | rs1037391  | 52367823 |
| 19 | rs74950305  | 19639448 | 18 | rs2198229  | 52369403 |
| 19 | rs4808967   | 19640524 | 18 | rs2864762  | 52373227 |
| 19 | rs55927782  | 19642032 | 18 | rs7238608  | 52375542 |
| 19 | rs10422819  | 19643028 | 18 | rs1833302  | 52421470 |
| 19 | rs113527843 | 19643343 | 18 | rs8092503  | 52479487 |
| 19 | rs8100927   | 19643636 | 18 | rs8090635  | 52665858 |
| 19 | rs8101219   | 19643715 | 18 | rs12954483 | 52734527 |
| 19 | rs34539063  | 19643907 | 18 | rs4131791  | 52747871 |
| 19 | rs4808206   | 19645645 | 18 | rs4309482  | 52750469 |
| 19 | rs2304098   | 19646272 | 18 | rs11874716 | 52750688 |
| 19 | rs1054930   | 19648346 | 18 | rs12966547 | 52752017 |
| 19 | rs11669730  | 19648713 | 18 | rs9965955  | 52764278 |
| 19 | rs11670775  | 19649636 | 18 | rs11665032 | 52886611 |



|    |             |          |    |            |          |
|----|-------------|----------|----|------------|----------|
| 19 | rs11670882  | 19649748 | 18 | rs7237259  | 52902885 |
| 19 | rs4808208   | 19650096 | 18 | rs1261115  | 52940528 |
| 19 | rs182557669 | 19650389 | 18 | rs1261117  | 52949657 |
| 19 | rs76790018  | 19652157 | 18 | rs8092679  | 53034140 |
| 19 | rs8102502   | 19652746 | 18 | rs1660241  | 53035650 |
| 19 | rs77616520  | 19652776 | 18 | rs1788030  | 53045198 |
| 19 | rs77427798  | 19652982 | 18 | rs1788025  | 53048678 |
| 19 | rs188263117 | 19653525 | 18 | rs9646596  | 53049212 |
| 19 | rs7252453   | 19654117 | 18 | rs17594526 | 53058238 |
| 19 | rs45556231  | 19654189 | 18 | rs17594665 | 53063719 |
| 19 | rs61744761  | 19656615 | 18 | rs17089778 | 53065342 |
| 19 | rs79765293  | 19657041 | 18 | rs17594721 | 53065892 |
| 19 | rs1036215   | 19657198 | 18 | rs11152369 | 53066328 |
| 19 | rs10402308  | 19657500 | 18 | rs17509991 | 53067184 |
| 19 | rs73924805  | 19657590 | 18 | rs2958175  | 53074958 |
| 19 | rs7245983   | 19657632 | 18 | rs10503001 | 53075696 |
| 19 | rs16964240  | 30982538 | 18 | rs2919450  | 53084545 |
| 19 | rs12980596  | 31015438 | 18 | rs4500831  | 53097544 |
| 20 | rs2254603   | 37381627 | 18 | rs12963463 | 53099093 |
| 20 | rs6128907   | 37387862 | 18 | rs4468713  | 53104019 |
| 20 | rs1006945   | 37458009 | 18 | rs10503002 | 53109202 |
| 22 | rs5750854   | 39990775 | 18 | rs12606995 | 53121576 |
| 22 | rs738168    | 40011697 | 18 | rs732779   | 53123172 |
| 22 | rs4821981   | 41415644 | 18 | rs2924321  | 53125435 |
| 22 | rs926914    | 41418154 | 18 | rs1377243  | 53134652 |
| 22 | rs8139287   | 41444686 | 18 | rs8090422  | 53146896 |
| 22 | rs5758209   | 41461865 | 18 | rs9960767  | 53155002 |
| 22 | rs139484    | 41627543 | 18 | rs2060889  | 53159541 |
| 22 | rs5751069   | 41627775 | 18 | rs17596974 | 53166557 |
| 22 | rs1953      | 41641984 | 18 | rs2958158  | 53172105 |
| 22 | rs8139515   | 41673592 | 18 | rs627685   | 53186092 |
| 22 | rs10483213  | 42339525 | 18 | rs10401120 | 53192498 |
| 22 | rs8140869   | 42344297 | 18 | rs17512836 | 53194961 |
| 22 | rs710194    | 42392560 | 18 | rs17597926 | 53205938 |
| 22 | rs133309    | 42398606 | 22 | rs7287939  | 41396353 |
| 22 | rs133315    | 42402005 | 22 | rs4821981  | 41415644 |
| 22 | rs133341    | 42418185 | 22 | rs926914   | 41418154 |
| 22 | rs16947     | 42523943 | 22 | rs8139287  | 41444686 |
| 22 | rs5751232   | 42564304 | 22 | rs5758209  | 41461865 |
| 22 | rs134871    | 42652716 | 22 | rs139484   | 41627543 |
| 22 | rs17478318  | 42658821 | 22 | rs5751069  | 41627775 |
| 22 | rs17002948  | 42688724 | 22 | rs1953     | 41641984 |
| 23 | rs1882411   | 5972382  | 22 | rs8139515  | 41673592 |
| 23 | rs11798753  | 6024351  | 22 | rs7290005  | 41742312 |
|    |             |          | 22 | rs2073167  | 41791536 |
|    |             |          | 22 | rs727563   | 41867377 |

---

Where: all SNPs have a MAF  $\geq$ 1% in an European, high CVD-risk cohort

STable 2: Demographic characteristics of the UKB2 MH and no MH participants, by cluster

|          | UKB2 no MH      |             |             |             | P           | UKB2 MH          |             |             |             |             |                  |
|----------|-----------------|-------------|-------------|-------------|-------------|------------------|-------------|-------------|-------------|-------------|------------------|
|          | 1               | 2           | 3           | .           |             | 1                | 2           | 3           | .           |             |                  |
| N (%)    | 2970 (17.5)     | 7761 (45.8) | 4966 (29.3) | 1254 (7.4)  |             | 1198 (37.1)      | 1491 (46.2) | 499 (15.4)  | 42 (1.3)    |             |                  |
| Male (%) | 1507 (50.7)     | 3932 (50.7) | 2468 (49.7) | 665 (47.0)  | 0.515       | 460 (38.4)       | 544 (36.5)  | 168 (33.7)  | 28 (66.7)   | 0.175       |                  |
| baseline | age             | 55.5 (7.5)  | 55.4 (7.5)  | 55.3 (.74)  | 55.4 (7.5)  | 0.241            | 54.1 (7.4)  | 54.5 (7.4)  | 53.5 (7.2)  | 52.5 (6.9)  | <b>0.037</b>     |
|          | weight          | 76.9 (14.4) | 77.1 (14.6) | 76.7 (14.8) | 77.8 (14.8) | 0.189            | 77.0 (15.8) | 76.7 (15.8) | 76.4 (14.8) | 77.5 (16.4) | 0.783            |
|          | waist           | 88 (12)     | 88 (12)     | 88 (13)     | 89 (13)     | 0.209            | 88 (14)     | 88 (14)     | 88 (13)     | 89 (16)     | 0.820            |
|          | hip             | 102 (8)     | 102 (8)     | 102 (8)     | 102 (8)     | 0.491            | 103 (9)     | 103 (9)     | 103 (9)     | 103 (10)    | 0.926            |
|          | whr             | 0.86 (0.09) | 0.86 (0.09) | 0.86 (0.09) | 0.87 (0.09) | 0.178            | 0.85 (0.09) | 0.85 (0.09) | 0.85 (0.09) | 0.86 (0.11) | 0.493            |
|          | bmi             | 26.5 (4.0)  | 26.5 (4.1)  | 26.5 (4.2)  | 26.7 (4.1)  | 0.277            | 27.0 (4.6)  | 27.1 (4.7)  | 27.1 (4.6)  | 27.4 (4.8)  | 0.947            |
|          | sbp             | 136 (17)    | 137 (18)    | 135 (18)    | 137 (18)    | <b>&lt;0.001</b> | 133 (18)    | 134 (17)    | 131 (17)    | 134 (14)    | <b>0.002</b>     |
|          | dbp             | 82 (10)     | 82 (10)     | 81 (10)     | 82 (10)     | <b>0.012</b>     | 81 (10)     | 81 (10)     | 80 (9)      | 82 (9)      | <b>0.023</b>     |
|          | sbp_adj         | 138 (19)    | 139 (20)    | 137 (19)    | 139 (20)    | <b>0.001</b>     | 135 (19)    | 136 (19)    | 133 (19)    | 137 (15)    | <b>&lt;0.001</b> |
|          | dbp_adj         | 83 (11)     | 83 (11)     | 83 (11)     | 84 (11)     | <b>0.035</b>     | 83 (11)     | 83 (11)     | 81 (10)     | 83 (10)     | <b>0.005</b>     |
|          | t2d             | 53 (1.8)    | 164 (2.1)   | 124 (2.5)   | 28 (2.2)    | 0.096            | 31 (2.6)    | 35 (2.4)    | 10 (2.0)    | 0 (0)       | 0.613            |
|          | htn             | 1296 (45.2) | 3539 (47.6) | 2079 (43.9) | 576 (45.9)  | <b>&lt;0.001</b> | 471 (40.5)  | 617 (42.6)  | 168 (34.5)  | 19 (45.2)   | <b>0.007</b>     |
|          | htn_meds        | 430 (14.5)  | 1065 (13.8) | 663 (13.4)  | 193 (15.4)  | 0.376            | 164 (13.7)  | 239 (16.2)  | 59 (11.9)   | 7 (16.7)    | <b>0.037</b>     |
|          | lipid-lowering  | 241 (17.6)  | 642 (17.9)  | 445 (19.7)  | 124 (9.9)   | 0.141            | 91 (21.4)   | 101 (21.2)  | 29 (19.5)   | 3 (7.1)     | 0.875            |
|          | ish             | 42 (1.4)    | 105 (1.4)   | 68 (1.4)    | 13 (1.0)    | 0.970            | 9 (0.8)     | 17 (1.1)    | 5 (1.0)     | 0 (0)       | 0.590            |
|          | current smoking | 153 (5.2)   | 471 (6.1)   | 291 (5.9)   | 73 (5.8)    | 0.132            | 87 (7.3)    | 121 (8.1)   | 35 (7.0)    | 3 (7.1)     | 0.677            |
|          | Ever smoker     | 1091 (36.7) | 3004 (38.7) | 1892 (38.1) | 519 (41.4)  | 0.176            | 518 (43.2)  | 635 (42.6)  | 209 (41.9)  | 22 (52.4)   | 0.846            |
| followup | age             | 63.6 (7.5)  | 63.4 (7.5)  | 63.4 (7.4)  | 63.4 (7.5)  | 0.340            | 62.1 (7.4)  | 61.5 (7.3)  | 61.5 (7.3)  | 60.8 (6.6)  | <b>0.039</b>     |
|          | weight          | 76.1 (14.6) | 76.3 (14.8) | 75.9 (14.8) | 77.0 (15.0) | 0.162            | 76.9 (16.0) | 76.4 (16.0) | 77.7 (15.6) | 79.5 (16.6) | 0.596            |
|          | waist           | 88 (12)     | 88 (12)     | 88 (12)     | 89 (12)     | 0.280            | 89 (13)     | 89 (13)     | 89 (13)     | 92 (14)     | 0.641            |
|          | hip             | 101 (8)     | 101 (8)     | 101 (9)     | 101 (9)     | 0.581            | 102 (10)    | 103 (10)    | 103 (10)    | 105 (9)     | 0.861            |
|          | whr             | 0.87 (0.09) | 0.87 (0.09) | 0.87 (0.08) | 0.88 (0.08) | 0.540            | 0.87 (0.09) | 0.86 (0.09) | 0.86 (0.09) | 0.87 (0.11) | 0.382            |
|          | bmi             | 26.4 (4.1)  | 26.4 (4.3)  | 26.4 (4.3)  | 26.7 (4.3)  | 0.390            | 27.1 (4.7)  | 27.2 (4.9)  | 27.3 (5.0)  | 28.3 (4.9)  | 0.811            |
|          | sbp             | 138 (18)    | 138 (18)    | 138 (18)    | 138 (17)    | 0.488            | 135 (18)    | 136 (18)    | 133 (17)    | 137 (21)    | 0.052            |
| dbp      | 78 (10)         | 79 (10)     | 78 (10)     | 79 (10)     | 0.124       | 78 (11)          | 81 (11)     | 79 (11)     | 80 (10)     | 0.281       |                  |

|                 |               |               |                |               |       |               |               |               |               |              |
|-----------------|---------------|---------------|----------------|---------------|-------|---------------|---------------|---------------|---------------|--------------|
| sbp_adj         | 141 (20)      | 141 (20)      | 141 (20)       | 142 (20)      | 0.488 | 138 (20)      | 139 (20)      | 136 (20)      | 141 (22)      | <b>0.023</b> |
| dbp_adj         | 81 (11)       | 81 (11)       | 81 (11)        | 81 (11)       | 0.211 | 81 (12)       | 81 (11)       | 79 (11)       | 82 (11)       | 0.072        |
| t2d             | 119 (4.0)     | 317 (4.1)     | 209 (4.21)     | 60 (4.8)      | 0.898 | 68 (5.7)      | 65 (4.4)      | 28 (5.6)      | 1 (2.4)       | 0.248        |
| htn             | 1819 (61.8)   | 4848 (63.0)   | 3063 (62.3)    | 802 (64.0)    | 0.439 | 705 (59.1)    | 883 (59.7)    | 266 (53.9)    | 28 (66.7)     | 0.066        |
| htn_meds        | 672 (22.7)    | 1775 (23.0)   | 1086 (22.0)    | 296 (23.6)    | 0.425 | 261 (21.9)    | 371 (25.0)    | 97 (19.5)     | 10 (23.8)     | <b>0.023</b> |
| lipid-lowering  | 644 (25.4)    | 1746 (26.1)   | 1119 (26.1)    | 303 (24.2)    | 0.762 | 273 (26.8)    | 347 (28.3)    | 116 (26.9)    | 8 (19.1)      | 0.702        |
| ish             | 48 (1.6)      | 134 (1.7)     | 93 (1.9)       | 16 (1.3)      | 0.681 | 11 (0.9)      | 25 (1.7)      | 6 (1.2)       | 0 (0)         | 0.223        |
| mm_mean_imt     | 0.689 (0.129) | 0.685 (0.126) | 0.682 (0.124)  | 0.688 (0.128) | 0.183 | 0.670 (0.124) | 0.671 (0.116) | 0.664 (0.122) | 0.670 (0.120) | 0.167        |
| mm_max_imt      | 0.923 (0.215) | 0.917 (0.208) | 0.913 (0.2009) | 0.921 (0.208) | 0.419 | 0.897 (0.202) | 0.903 (0.120) | 0.889 (0.209) | 0.920 (0.225) | 0.105        |
| current smoking | 89 (3.0)      | 254 (3.3)     | 163 (3.3)      | 42 (3.4)      | 0.653 | 56 (4.7)      | 77 (5.2)      | 25 (5.0)      | 2 (4.8)       | 0.887        |
| Ever smoker     | 1041 (35.1)   | 2853 (36.8)   | 1804 (36.3)    | 491 (39.2)    | 0.285 | 499 (41.7)    | 609 (40.9)    | 189 (37.9)    | 22 (52.4)     | 0.442        |

Where: \*, adjusted to provide estimates of treatment-naïve levels; na, not available

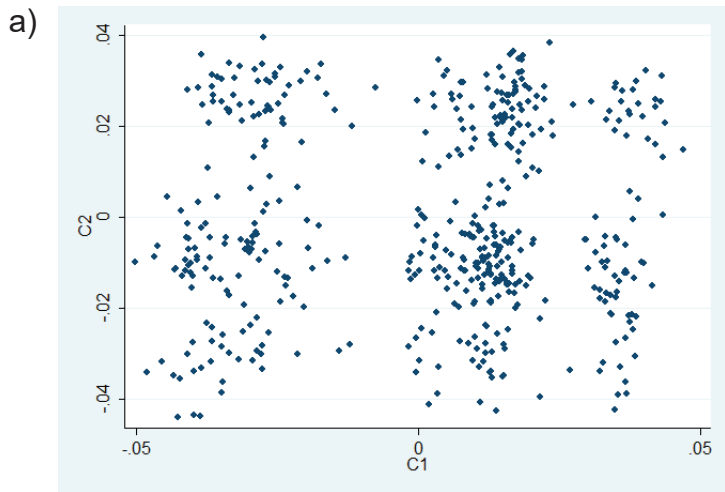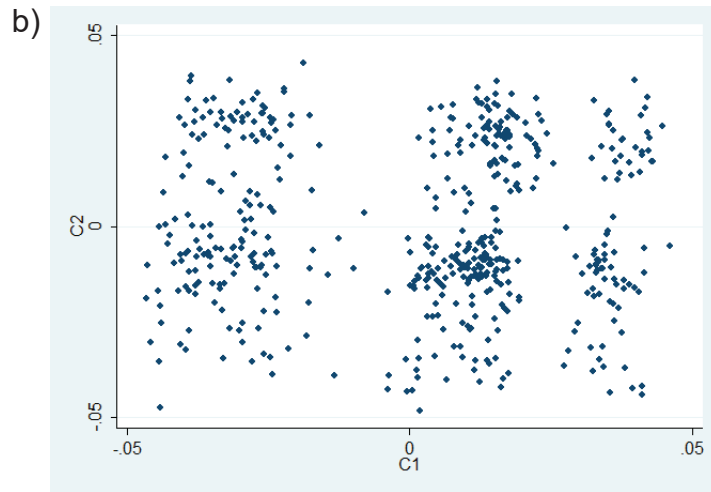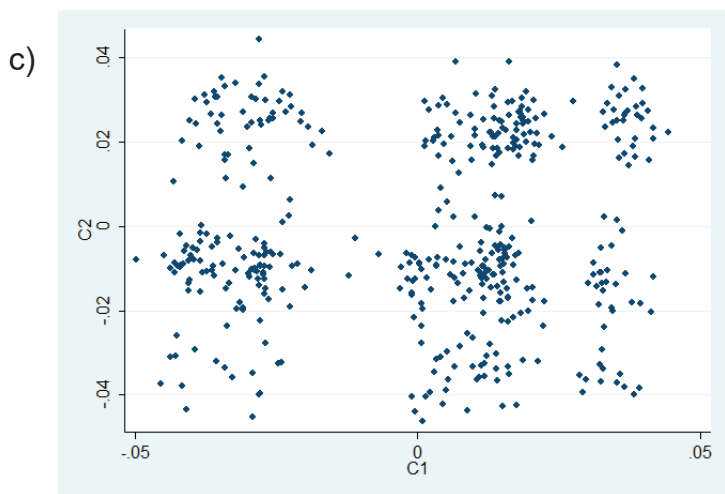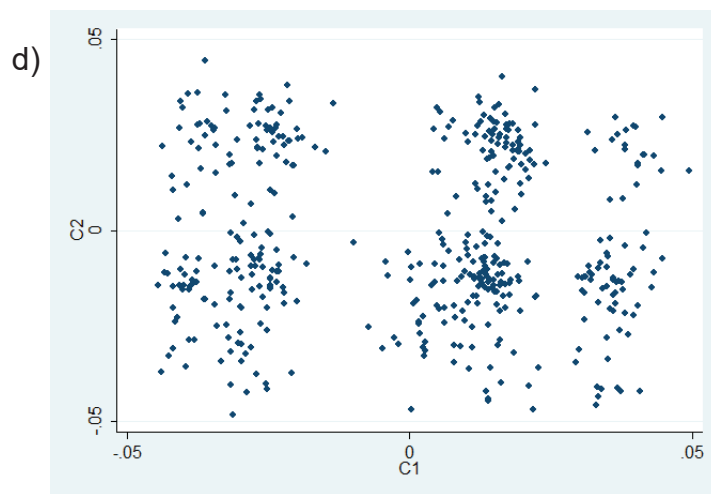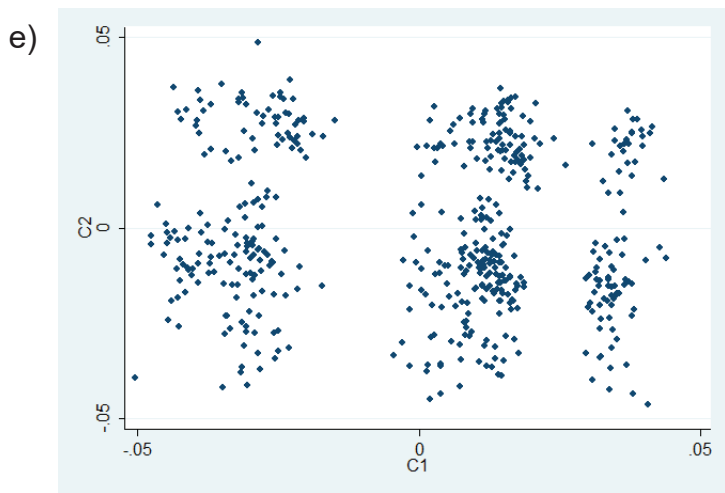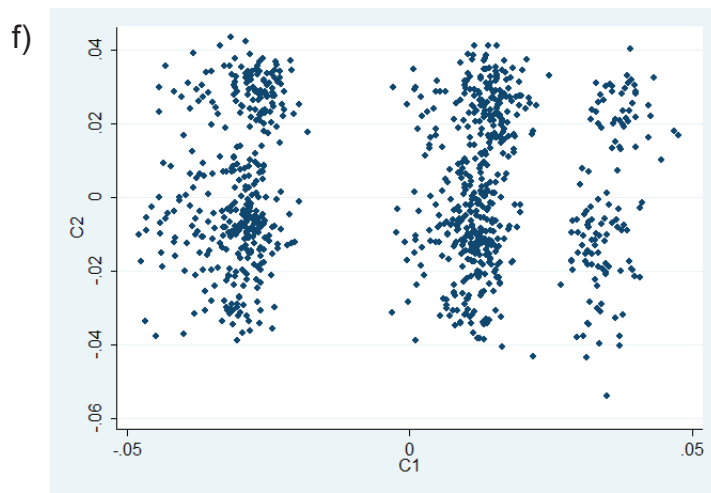

# SFIGA: UKB2 all SCZ SNPs

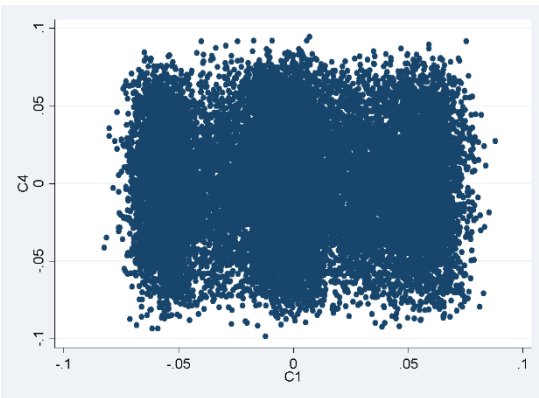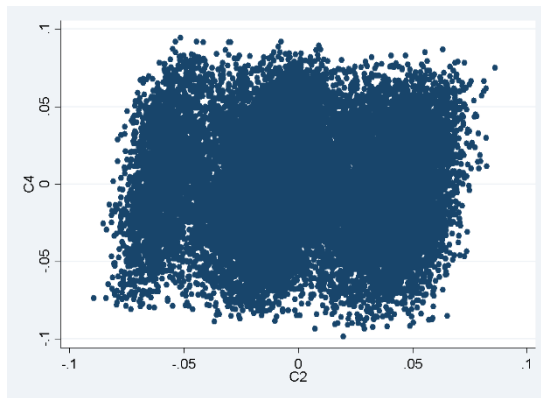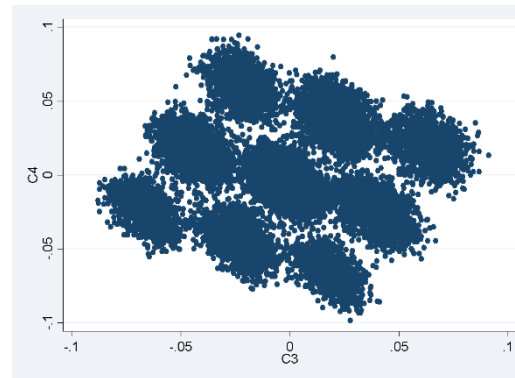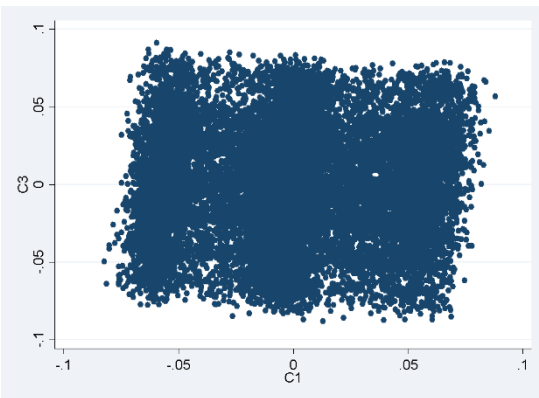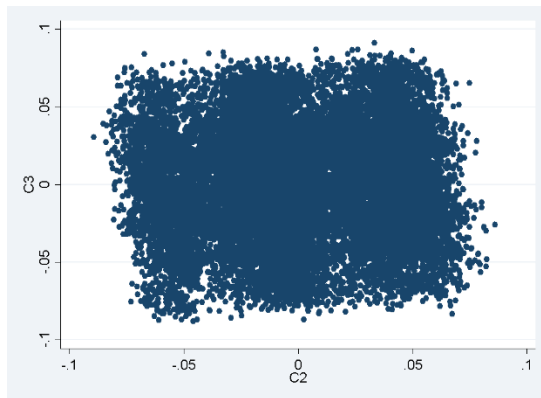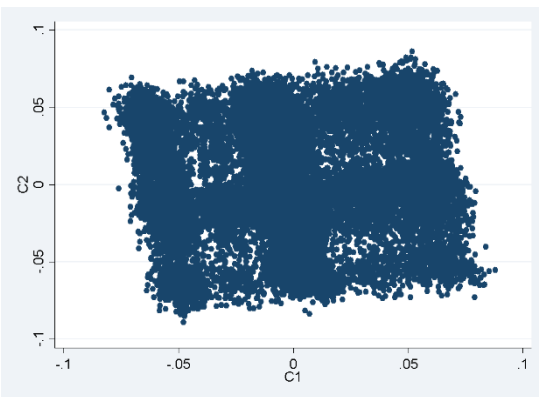

Supplement: Supplementary file [file 2020.06.23.20138271-1.pdf]
